# Supplementary material
Source: Royal Society of Chemistry journal article supplement (doi:10.1039/d6cc01180b)
Supplement: d6cc01180b1.pdf [file d6cc01180b1.pdf]

# Catalyst-controlled regio- and chemodivergent C–H functionalization of imidazopyridines with TIPS-protected terminal alkynes

Tiantian Zhu,<sup>‡</sup> Qiang Zhang,<sup>‡</sup> Xianling Li, Taoyuan Liang, Shuangliang  
Zhao\* and Zhuan Zhang\*

School of Chemistry and Chemical Engineering, Guangxi University,  
Nanning, Guangxi 530004, P. R. China

Email: [szhao@gxu.edu.cn](mailto:szhao@gxu.edu.cn); [zhuan.zhang@gxu.edu.cn](mailto:zhuan.zhang@gxu.edu.cn)

## Table of Contents

|           |                                                                                      |           |
|-----------|--------------------------------------------------------------------------------------|-----------|
| <b>1.</b> | <b><u>General information</u></b> .....                                              | <b>2</b>  |
| <b>2.</b> | <b><u>Optimization of the reaction conditions</u></b> .....                          | <b>3</b>  |
| <b>3.</b> | <b><u>Experimental procedure</u></b> .....                                           | <b>5</b>  |
| 3.1       | Procedure for the synthesis of starting materials .....                              | 5         |
| 3.2       | Pd(II)-catalyzed oxidative C3-alkynylation of imidazo[1,2- <i>a</i> ]pyridines ..... | 5         |
| 3.3       | Rh(I)-catalyzed <i>ortho</i> -alkenylation of imidazo[1,2- <i>a</i> ]pyridines ..... | 5         |
| 3.4       | Pd(II) -catalyzed oxidative C3-alkylation: reaction on 3 mmol scale .....            | 19        |
| 3.5       | Rh(I)-catalyzed <i>ortho</i> -alkenylation: reaction on 3 mmol scale .....           | 19        |
| 3.6       | Preparation and characterization of products 5, 6, 7, 8, 9, 10, 11 .....             | 20        |
| 3.7       | H/D exchange experiment.....                                                         | 24        |
| 3.8       | KIE determination.....                                                               | 28        |
| <b>4.</b> | <b><u>Crystallographic description</u></b> .....                                     | <b>31</b> |
| <b>5.</b> | <b><u>NMR charts</u></b> .....                                                       | <b>44</b> |
| <b>6.</b> | <b><u>References</u></b> .....                                                       | <b>92</b> |

## 1. General information

All the reagents were purchased from Bide Pharmatech Ltd. and Energy Chemical. All solvents were purchased from Greagent (Shanghai Titansci incorporated company) and used without further purification. Unless otherwise stated, all reactions were carried out in oven-dried glassware under air atmosphere. All heating reactions were heated by metal sand bath (WATTCAS, LAB-600).  $^1\text{H}$ -NMR spectra were obtained on Bruker-600. NMR spectra for all the samples were recorded in deuteriochloroform ( $\text{CDCl}_3$ ) and deuterated methanol ( $\text{CD}_3\text{OD}$ ). Chemical shifts ( $\delta$ ) were reported in parts per million relative to residual chloroform (7.28 ppm for  $^1\text{H}$ ; 77.23 ppm for  $^{13}\text{C}$ ) and deuterated methanol (4.87 ppm for  $^1\text{H}$ ; 49.00 ppm for  $^{13}\text{C}$ ), constants were reported in Hertz.  $^1\text{H}$  NMR assignment abbreviations were the following: singlet (s), doublet (d), triplet (t), quartet (q), doublets of doublet (dd), doublets of triplet (dt), triplets of doublet (td), triplets of triplet (tt) and multiplet (m), integration and coupling constant(s)  $J$  in hertz (Hz).  $^{13}\text{C}$  NMR spectra were recorded at 151 MHz on the same spectrometer and reported in ppm. All spectra were processed using the MestReNova program.

High-resolution mass spectra (HRMS) were recorded on a mass spectrometer (Thermo fisher Q Exactive HRMS) using electrospray ionization-time of flight (ESI-TOF) reflection experiments.

## 2. Optimization of the reaction conditions

We first optimized the C3-alkynylation under Pd catalysis. With Pd(OAc)<sub>2</sub> as the catalyst and PivOK as the base in acetonitrile, the desired product **3aa** was obtained in 80% yield (see Table S1). Control experiments revealed that omission of either the Pd catalyst or the base completely suppressed the reaction (entries 2–3). Screening of alternative bases, including Na<sub>2</sub>CO<sub>3</sub>, KOAc, NaHCO<sub>3</sub>, and Cs<sub>2</sub>CO<sub>3</sub>, resulted in lower yields, indicating the superiority of PivOK (entries 4–7). Solvent evaluation showed that toluene, DCE, and 1,4-dioxane were less effective than CH<sub>3</sub>CN (entries 8–10). Notably, the addition of CH<sub>3</sub>COOH as a co-solvent (CH<sub>3</sub>CN/CH<sub>3</sub>COOH, 10/1) did not significantly affect the reaction yield (entry 11). In addition, lowering the reaction temperature or shortening the reaction time led to diminished yields of **3aa** (entries 12–13). We next investigated the *ortho*-alkenylation using a Rh-catalyzed system. Gratifyingly, employing [Rh(COD)Cl]<sub>2</sub> as the catalyst afforded the desired product **4aa** in 90% yield with excellent regioselectivity (entry 14). Control experiments confirmed that both KOAc and the Rh catalyst were essential for the transformation (entries 15–16). Further optimization demonstrated the critical roles of additives and solvents in achieving optimal efficiency (entries 17–23). Similarly, the addition of CH<sub>3</sub>COOH as a co-solvent (*m*-xylene/CH<sub>3</sub>COOH, 10/1) showed no significant influence on the reaction outcome (entry 24). As observed in the Rh system, decreasing the reaction temperature or reducing the reaction time resulted in inferior yields (entries 25–26). Moreover, the reaction failed to proceed under aerobic conditions, underscoring the necessity of an inert atmosphere (entry 27).

**Table S1.** Optimization of the reaction conditions <sup>a</sup>

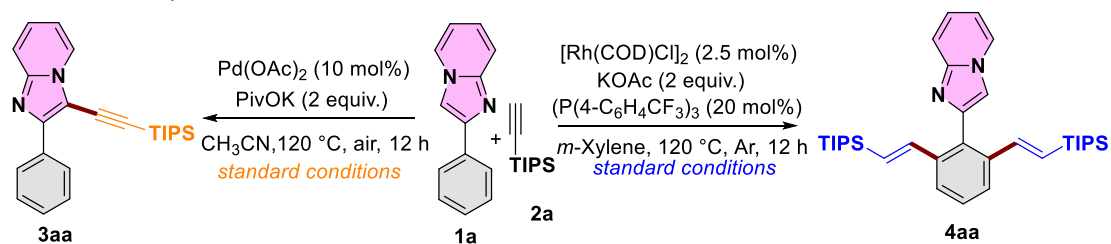

| entry | variation from "standard conditions"                                        | yield[%] <sup>b</sup><br>3aa/4aa |
|-------|-----------------------------------------------------------------------------|----------------------------------|
| 1     | none                                                                        | 80/-                             |
| 2     | without $\text{Pd}(\text{OAc})_2$                                           | 0/-                              |
| 3     | without PivOK                                                               | trace/-                          |
| 4     | $\text{Na}_2\text{CO}_3$ (2 equiv.) instead of PivOK                        | 56/-                             |
| 5     | KOAc (2 equiv.) instead of PivOK                                            | 20/-                             |
| 6     | $\text{NaHCO}_3$ (2 equiv.) instead of PivOK                                | 38/-                             |
| 7     | $\text{Cs}_2\text{CO}_3$ (2 equiv.) instead of PivOK                        | 0/-                              |
| 8     | toluene instead of $\text{CH}_3\text{CN}$                                   | 61                               |
| 9     | DCE instead of $\text{CH}_3\text{CN}$                                       | 58                               |
| 10    | 1,4-dioxane instead of $\text{CH}_3\text{CN}$                               | 63                               |
| 11    | $\text{CH}_3\text{CN}/\text{CH}_3\text{COOH}$ (10/1)                        | 76/-                             |
| 12    | carried out at 100 °C                                                       | 47/-                             |
| 13    | carried out for 8 h                                                         | 64/-                             |
| 14    | none                                                                        | -/90                             |
| 15    | without $[\text{Rh}(\text{COD})\text{Cl}]_2$                                | -/0                              |
| 16    | without KOAc                                                                | -/trace                          |
| 17    | $\text{PPh}_3$ instead of $(\text{P}(4\text{-C}_6\text{H}_4\text{CF}_3)_3)$ | -/28                             |
| 18    | $\text{PCy}_3$ instead of $(\text{P}(4\text{-C}_6\text{H}_4\text{CF}_3)_3)$ | -/trace                          |
| 19    | $\text{K}_2\text{CO}_3$ (2 equiv.) instead of KOAc                          | -/12                             |
| 20    | $\text{NaHCO}_3$ (2 equiv.) instead of KOAc                                 | -/trace                          |
| 21    | PivOH (2 equiv.) instead of KOAc                                            | -/48                             |
| 22    | DCE instead of <i>m</i> -Xylene                                             | -/36                             |
| 23    | 1.4-dioxane instead of <i>m</i> -Xylene                                     | -/41                             |
| 24    | <i>m</i> -Xylene/ $\text{CH}_3\text{COOH}$ (10/1)                           | -/87                             |
| 25    | carried out at 100 °C                                                       | -/62                             |
| 26    | carried out for 8 h                                                         | -/67                             |
| 27    | air instead of Ar                                                           | -/0                              |

<sup>a</sup>Reaction conditions for **3aa**: **1a** (0.2 mmol), **2a** (entries 1–13, 0.3 mmol),  $\text{Pd}(\text{OAc})_2$  (10 mol%), PivOK (0.4 mmol) and  $\text{CH}_3\text{CN}$  (1.5 mL). Reaction conditions for **4aa**: **1a** (0.2 mmol), **2a** (entries 14–26, 0.5 mmol),  $[\text{Rh}(\text{COD})\text{Cl}]_2$  (2.5 mol%),  $(\text{P}(4\text{-C}_6\text{H}_4\text{CF}_3)_3)$  (0.04 mmol), KOAc (0.4 mmol) and *m*-Xylene (1.5 mL). <sup>b</sup>Isolated yield.

### 3. Experimental procedure

#### 3.1 Procedure for the synthesis of starting materials

All known 2-aryl imidazopyridines (**1a–1t**) were synthesized following the reported procedure.<sup>1</sup> Notably, substrates **1u** and **1v** were prepared according to a different literature method.<sup>2,3</sup> All alkynes (**2a–2b**) were purchased from Bide Pharmatech Ltd.

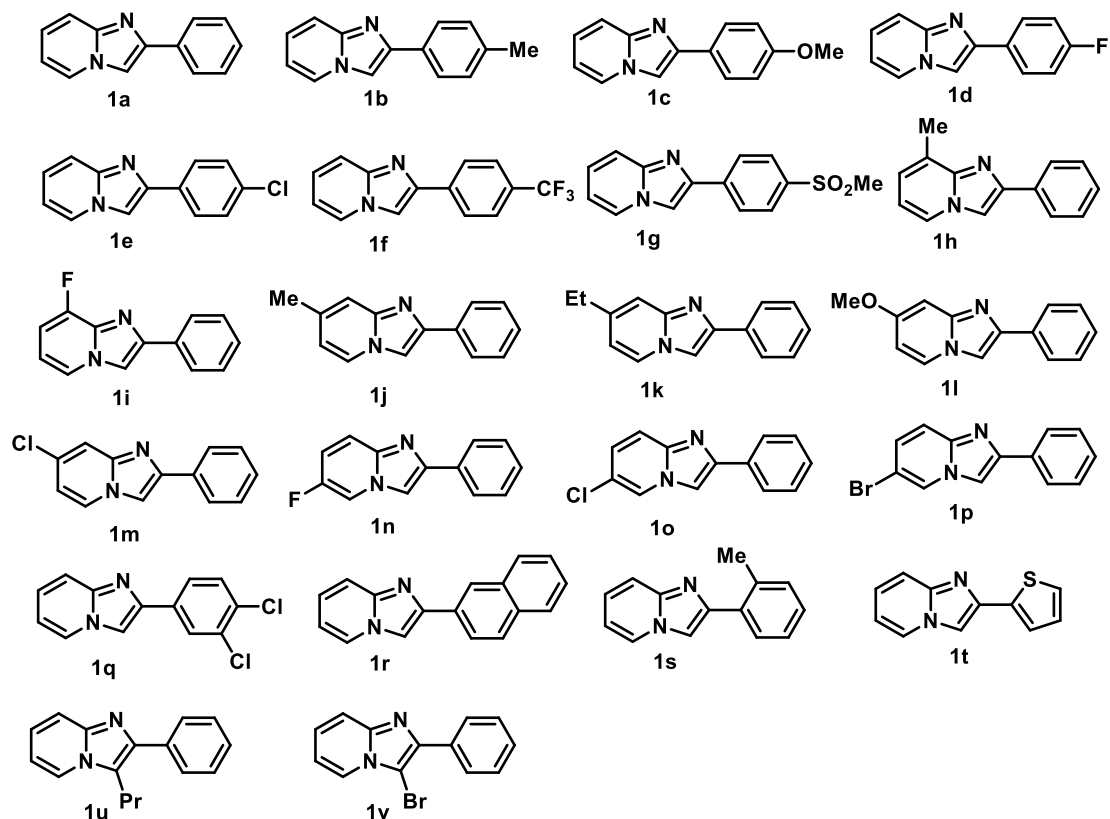

#### 3.2 Pd(II)-catalyzed oxidative C3-alkynylation of imidazo[1,2-a]pyridines

**General Procedure A:** To a 15 mL oven dried Schlenk tube, PivOK (0.4 mmol, 2 equiv.), imidazo[1,2-a]pyridines (0.2 mmol, 1 equiv.), Pd(OAc)<sub>2</sub> (4.5 mg, 0.02 mmol, 10 mol%), terminal alkyne (0.3 mmol, 1.5 equiv.) and CH<sub>3</sub>CN (1.5 mL) were successively added. The reaction mixture was stirred at 120 °C (metal sand bath temperature) for 12 hours under air. After cooling the reaction at room temperature and concentration, the crude mixture was purified by silica column chromatography to afford the desired alkynylated products **3**.

#### 3.3 Rh(I)-catalyzed *ortho*-alkenylation of imidazo[1,2-a]pyridines

**General Procedure B:** To a 15 mL oven dried Schlenk tube, (P(4-C<sub>6</sub>H<sub>4</sub>CF<sub>3</sub>)<sub>3</sub>)<sub>3</sub> (18.7 mg, 0.04 mmol, 20 mol%), imidazo[1,2-a]pyridines (0.2 mmol, 1 equiv.), [Rh(cod)Cl]<sub>2</sub> (2.5 mg, 0.005 mmol, 2.5 mol%), KOAc (0.4 mmol, 2 equiv.), terminal alkyne (0.5 mmol, 2.5 equiv.), and *m*-xylene (1.5 mL) were successively added. The reaction mixture was stirred at 120 °C (metal sand bath temperature) for 12 hours under Ar. After cooling the reaction at room temperature and concentration, the crude mixture was purified by silica column chromatography to afford the

desired alkenylated products **4**.

**General Procedure C:** To a 15 mL oven dried Schlenk tube,  $(P(4-C_6H_4CF_3)_3)_3$  (18.7 mg, 0.04 mmol, 20 mol%), imidazo[1,2-*a*]pyridines (0.2 mmol, 1 equiv.),  $[Rh(cod)Cl]_2$  (2.5 mg, 0.005 mmol, 2.5 mol%), KOAc (0.4 mmol, 2 equiv.), terminal alkyne (0.5 mmol, 2.5 equiv.), and *m*-xylene (1.5 mL) were successively added. The reaction mixture was stirred at 120 °C (metal sand bath temperature) for 4 hours under Ar. After cooling the reaction at room temperature and concentration, the crude mixture was purified by silica column chromatography to afford the desired alkenylated products **4**.

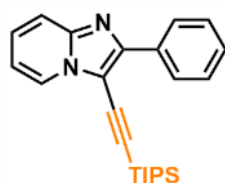

**2-Phenyl-3-((triisopropylsilyl)ethynyl)imidazo[1,2-*a*]pyridine (3aa).**

Following the general procedure **A** using 2-phenylimidazopyridine (38.8 mg, 0.2 mmol) and TIPS-protected terminal alkyne (54.7 mg, 0.3 mmol), the residue was purified by flash chromatography on silica gel (petroleum ether/ethyl acetate = 30:1) to afford **3aa** (59.9 mg, 80%) as a white solid.

Mp: 106-108 °C.

**<sup>1</sup>H NMR (600 MHz, CDCl<sub>3</sub>)** δ 8.42 (d, *J* = 7.2 Hz, 2H), 8.27 (d, *J* = 6.7 Hz, 1H), 7.66 (d, *J* = 9.0 Hz, 1H), 7.45 (t, *J* = 7.6 Hz, 2H), 7.37 (t, *J* = 7.3 Hz, 1H), 7.29 – 7.24 (m, 1H), 6.92 (t, *J* = 6.8 Hz, 1H), 1.26 – 1.19 (m, 21H).

**<sup>13</sup>C NMR (151 MHz, CDCl<sub>3</sub>)** δ 148.3, 145.0, 133.4, 128.6, 128.4, 127.3, 126.2, 125.2, 117.5, 113.1, 105.3, 104.8, 95.3, 18.8, 11.4.

**HRMS (ESI)** *m/z*: [M+H]<sup>+</sup> Calcd for C<sub>24</sub>H<sub>31</sub>N<sub>2</sub>Si 375.2251; Found 375.2243.

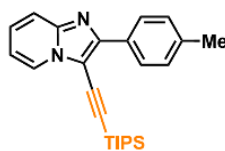

**2-(*p*-Tolyl)-3-((triisopropylsilyl)ethynyl)imidazo[1,2-*a*]pyridine (3ba).**

Following the general procedure **A** using 2-(*p*-tolyl)imidazo[1,2-*a*]pyridine (41.6 mg, 0.2 mmol) and TIPS-protected terminal alkyne (54.7 mg, 0.3 mmol), the residue was purified by flash chromatography on silica gel (petroleum ether/ethyl acetate = 30:1) to afford **3ba** (58.2 mg, 75%) as a white solid.

Mp: 118-120 °C.

**<sup>1</sup>H NMR (600 MHz, CDCl<sub>3</sub>)** δ 8.34 – 8.32 (m, 2H), 8.25 (d, *J* = 6.7 Hz, 1H), 7.63 (d, *J* = 9.0 Hz, 1H), 7.24 (d, *J* = 3.3 Hz, 2H), 7.23 – 7.21 (m, 1H), 6.89 (td, *J* = 6.8, 1.0 Hz, 1H), 2.40 (s, 3H), 1.26 – 1.15 (m, 21H).

**<sup>13</sup>C NMR (151 MHz, CDCl<sub>3</sub>)** δ 148.4, 144.9, 138.4, 130.6, 129.13, 127.2, 126.1, 125.1, 117.4, 112.9, 104.9, 104.7, 95.5, 21.4, 18.8, 11.4.

**HRMS (ESI)** *m/z*: [M+H]<sup>+</sup> Calcd for C<sub>25</sub>H<sub>33</sub>N<sub>2</sub>Si 389.2407; Found 389.2401.

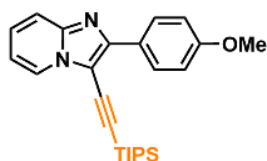

**2-(4-Methoxyphenyl)-3-((triisopropylsilyl)ethynyl)imidazo[1,2-*a*]pyridine (3ca).**

Following the general procedure **A** using 2-(4-methoxyphenyl)imidazo[1,2-*a*]pyridine (44.8 mg, 0.2 mmol) and TIPS-protected terminal alkyne (54.7 mg, 0.2 mmol), the residue was purified by flash chromatography on silica gel (petroleum ether/ethyl acetate = 30:1) to afford **3ca** (63.1 mg, 78%) as a white solid. Mp: 124-126 °C.

**<sup>1</sup>H NMR (600 MHz, CDCl<sub>3</sub>)** δ 8.36 (d, *J* = 8.8 Hz, 2H), 8.25 (d, *J* = 6.8 Hz, 1H), 7.62 (d, *J* = 9.0 Hz, 1H), 7.24 (d, *J* = 7.5 Hz, 1H), 6.97 (d, *J* = 8.8 Hz, 2H), 6.90 (t, *J* = 6.5 Hz, 1H), 3.86 (s, 3H), 1.31 – 1.16 (m, 21H).

**<sup>13</sup>C NMR (151 MHz, CDCl<sub>3</sub>)** δ 160.0, 148.3, 144.9, 128.7, 126.1, 126.1, 125.1, 117.2, 113.8, 112.9, 104.6, 104.4, 95.6, 55.3, 18.8, 11.4.

**HRMS (ESI)** *m/z*: [M+H]<sup>+</sup> Calcd for C<sub>25</sub>H<sub>33</sub>N<sub>2</sub>OSi 405.2356; Found 405.2351.

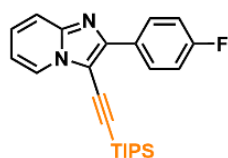

**2-(4-Fluorophenyl)-3-((triisopropylsilyl)ethynyl)imidazo[1,2-*a*]pyridine (3da).** Following the general procedure **A** using 2-(4-fluorophenyl)imidazo[1,2-*a*]pyridine (42.4 mg, 0.2 mmol) and TIPS-

protected terminal alkyne (54.7 mg, 0.3 mmol), the residue was purified

by flash chromatography on silica gel (petroleum ether/ethyl acetate = 30:1) to afford **3da** (54.1 mg, 69%) as a brown solid. Mp: 119-121 °C.

**<sup>1</sup>H NMR (600 MHz, CDCl<sub>3</sub>)** δ 8.39 (dd, *J* = 8.6, 5.5 Hz, 2H), 8.26 (d, *J* = 6.7 Hz, 1H), 7.64 (d, *J* = 9.0 Hz, 1H), 7.30 – 7.26 (m, 1H), 7.12 (t, *J* = 8.7 Hz, 2H), 6.94 (t, *J* = 6.7 Hz, 1H), 1.23 – 1.17 (m, 21H).

**<sup>13</sup>C NMR (151 MHz, CDCl<sub>3</sub>)** δ 163.8 (d, *J* = 249.3 Hz), 162.2, 147.4, 144.9, 129.1 (d, *J* = 8.3 Hz), 126.4, 125.2 (d, *J* = 3.2 Hz), 117.4, 115.4 (d, *J* = 21.6 Hz), 113.2, 95.1, 18.7, 11.3.

**<sup>19</sup>F NMR (565 MHz, CDCl<sub>3</sub>)** δ -112.81 (s).

**HRMS (ESI)** *m/z*: [M+H]<sup>+</sup> Calcd for C<sub>24</sub>H<sub>29</sub>FN<sub>2</sub>Si 393.2156; Found 393.2158.

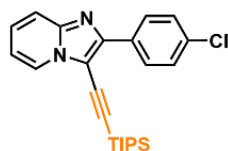

**2-(4-Chlorophenyl)-3-((triisopropylsilyl)ethynyl)imidazo[1,2-*a*]pyridine (3ea).** Following the general procedure **A** using 2-(4-chlorophenyl)imidazo[1,2-*a*]pyridine (45.6 mg, 0.2 mmol) and TIPS-

protected terminal alkyne (54.7 mg, 0.3 mmol), the residue was purified

by flash chromatography on silica gel (petroleum ether/ethyl acetate = 30:1) to afford **3ea** (53.1 mg, 65%) as a white solid. Mp: 130-132 °C.

**<sup>1</sup>H NMR (600 MHz, CDCl<sub>3</sub>)** δ 8.36 (d, *J* = 8.6 Hz, 2H), 8.24 (d, *J* = 6.8 Hz, 1H), 7.62 (d, *J* = 9.0 Hz, 1H), 7.40 (d, *J* = 8.6 Hz, 2H), 7.27 – 7.23 (m, 1H), 6.91 (td, *J* = 6.7, 1.1 Hz, 1H), 1.25 – 1.17 (m, 21H).

**<sup>13</sup>C NMR (151 MHz, CDCl<sub>3</sub>)** δ 147.0, 145.0, 134.3, 132.0, 128.6, 128.5, 126.4, 125.1, 117.5, 113.2, 105.4, 105.3, 95.0, 18.8, 11.3.

**HRMS (ESI)** *m/z*: [M+H]<sup>+</sup> Calcd for C<sub>24</sub>H<sub>30</sub>N<sub>2</sub>ClSi 409.1861; Found 409.1853.

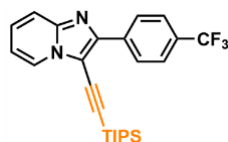

**2-(4-(Trifluoromethyl)phenyl)-3-((triisopropylsilyl)ethynyl)imidazo[1,2-*a*]pyridine (3fa).** Following the general procedure **A** using 2-(4-(trifluoromethyl)phenyl)imidazo[1,2-*a*]pyridine (52.4 mg, 0.2 mmol) and

TIPS-protected terminal alkyne (54.7 mg, 0.3 mmol), the residue was

purified by flash chromatography on silica gel (petroleum ether/ethyl acetate = 30:1) to afford **3fa** (51.3 mg, 58%) as a white solid. Mp: 136-138 °C.

**<sup>1</sup>H NMR (600 MHz, CDCl<sub>3</sub>)** δ 8.54 (d, *J* = 8.2 Hz, 2H), 8.28 (d, *J* = 6.8 Hz, 1H), 7.69 (d, *J* = 8.2 Hz, 2H), 7.65 (d, *J* = 9.0 Hz, 1H), 7.32 – 7.27 (m, 1H), 6.95 (t, *J* = 6.7 Hz, 1H), 1.27 – 1.18 (m, 21H).

$^{13}\text{C}$  NMR (151 MHz,  $\text{CDCl}_3$ )  $\delta$  146.4, 145.1, 136.9, 127.3, 126.7, 125.3 (q,  $J = 3.6$  Hz), 117.7, 113.4, 106.0 (q,  $J = 33.5$  Hz), 94.7, 18.7, 11.3.

$^{19}\text{F}$  NMR (565 MHz,  $\text{CDCl}_3$ )  $\delta$  -62.50 (s).

HRMS (ESI)  $m/z$ :  $[\text{M}+\text{H}]^+$  Calcd for  $\text{C}_{25}\text{H}_{30}\text{F}_3\text{N}_2\text{Si}$  443.2124; Found 443.2117.

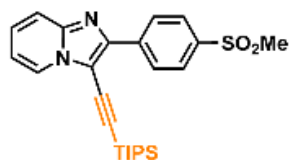

**2-(4-Sulfonylphenyl)-3-((triisopropylsilyl)ethynyl)imidazo[1,2-*a*]pyridine (3ga).** Following the general procedure A using 2-(4-sulfonylphenyl)imidazo[1,2-*a*]pyridine (54.2 mg, 0.2 mmol) and

TIPS-protected terminal alkyne (54.7 mg, 0.3 mmol), the residue

was purified by flash chromatography on silica gel (petroleum ether/ethyl acetate = 30:1) to afford **3ga** (38.0 mg, 42%) as a brown solid. Mp: 166-168 °C.

$^1\text{H}$  NMR (600 MHz,  $\text{CDCl}_3$ )  $\delta$  8.63 (d,  $J = 8.1$  Hz, 2H), 8.30 (d,  $J = 6.7$  Hz, 1H), 8.00 (d,  $J = 8.2$  Hz, 2H), 7.71 (d,  $J = 8.5$  Hz, 1H), 7.40 – 7.32 (m, 1H), 7.01 (t,  $J = 6.7$  Hz, 1H), 3.10 (s, 3H), 1.25 – 1.19 (m, 21H).

$^{13}\text{C}$  NMR (151 MHz,  $\text{CDCl}_3$ )  $\delta$  145.6, 145.1, 139.7, 138.8, 127.7, 127.5, 127.0, 125.3, 117.8, 113.7, 106.6, 106.4, 44.6, 29.7, 18.8, 11.3.

HRMS (ESI)  $m/z$ :  $[\text{M}+\text{H}]^+$  Calcd for  $\text{C}_{25}\text{H}_{32}\text{N}_2\text{O}_2\text{Si}$  453.2023; Found 453.2026.

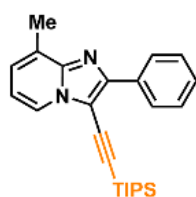

**8-Methyl-2-phenyl-3-((triisopropylsilyl)ethynyl)imidazo[1,2-*a*]pyridine (3ha).** Following the general procedure A using 8-methyl-2-

phenylimidazo[1,2-*a*]pyridine (41.6 mg, 0.2 mmol) and TIPS-protected terminal alkyne (78.3 mg, 0.3 mmol), the residue was purified by flash chromatography on silica gel (petroleum ether/ethyl acetate = 30:1) to

afford **3ha** (52.0 mg, 67%) as a yellow solid. Mp: 118-120 °C.

$^1\text{H}$  NMR (600 MHz,  $\text{CDCl}_3$ )  $\delta$  8.48 (d,  $J = 7.2$  Hz, 2H), 8.16 (d,  $J = 6.7$  Hz, 1H), 7.48 (d,  $J = 7.5$  Hz, 2H), 7.39 (t,  $J = 7.4$  Hz, 1H), 7.01 (dt,  $J = 6.9, 1.4$  Hz, 1H), 6.81 (t,  $J = 6.8$  Hz, 1H), 2.68 (s, 3H), 1.24 (dq,  $J = 11.9, 7.3, 5.4$  Hz, 21H).

$^{13}\text{C}$  NMR (151 MHz,  $\text{CDCl}_3$ )  $\delta$  147.9, 145.4, 133.8, 128.37, 128.35, 127.6, 127.4, 125.0, 122.9, 113.0, 105.6, 104.3, 95.8, 18.8, 16.9, 11.4.

HRMS (ESI)  $m/z$ :  $[\text{M}+\text{H}]^+$  Calcd for  $\text{C}_{25}\text{H}_{33}\text{N}_2\text{Si}$  389.2407; Found 389.2400.

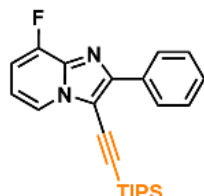

**8-Fluoro-2-phenyl-3-((triisopropylsilyl)ethynyl)imidazo[1,2-*a*]pyridine (3ia).** Following the general procedure A using 8-fluoro-2-

phenylimidazo[1,2-*a*]pyridine (42.4 mg, 0.2 mmol) and TIPS-protected terminal alkyne (54.7 mg, 0.3 mmol), the residue was purified by flash chromatography on silica gel (petroleum ether/ethyl acetate = 30:1) to

afford **3ia** (46.3 mg, 59%) as a yellow solid. Mp: 128-130 °C.

$^1\text{H}$  NMR (600 MHz,  $\text{CDCl}_3$ )  $\delta$  8.45 (d,  $J = 7.1$  Hz, 2H), 8.10 (dd,  $J = 6.7, 0.8$  Hz, 1H), 7.47 – 7.43 (m, 2H), 7.40 – 7.37 (m, 1H), 6.97 (ddd,  $J = 10.1, 7.7, 1.0$  Hz, 1H), 6.85 (ddd,  $J = 7.6, 6.7, 4.4$  Hz, 1H), 1.25 – 1.19 (m, 21H).

$^{13}\text{C}$  NMR (151 MHz,  $\text{CDCl}_3$ )  $\delta$  152.3, 150.6, 148.4, 137.3 (d,  $J = 27.2$  Hz), 132.9, 128.8, 128.4, 127.4, 121.4 (d,  $J = 4.5$  Hz), 112.1 (d,  $J = 6.0$  Hz), 108.9 (d,  $J = 16.6$  Hz), 106.7, 105.5, 94.8, 18.7, 11.3.

<sup>19</sup>F NMR (565 MHz, CDCl<sub>3</sub>) δ -129.91 (s).

HRMS (ESI) m/z: [M+H]<sup>+</sup> Calcd for C<sub>24</sub>H<sub>30</sub>FN<sub>2</sub>Si 393.2156; Found 393.2148.

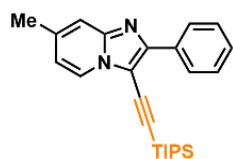

**7-Methyl-2-phenyl-3-((triisopropylsilyl)ethynyl)imidazo[1,2-*a*]pyridine (3ja).** 7-methyl-2-phenylimidazo[1,2-*a*]pyridine (41.6 mg, 0.2 mmol) and TIPS-protected terminal alkyne (54.7 mg, 0.3 mmol), the residue was purified by flash chromatography on silica gel (petroleum ether/ethyl acetate = 30:1) to afford **3ja** (54.4 mg, 70%) as a brown oil.

<sup>1</sup>H NMR (600 MHz, CDCl<sub>3</sub>) δ 8.40 (d, *J* = 7.6 Hz, 2H), 8.13 (d, *J* = 6.9 Hz, 1H), 7.46 – 7.38 (m, 3H), 7.35 (t, *J* = 7.3 Hz, 1H), 6.74 (d, *J* = 6.8 Hz, 1H), 2.40 (s, 3H), 1.25 – 1.17 (m, 21H).

<sup>13</sup>C NMR (151 MHz, CDCl<sub>3</sub>) δ 148.2, 145.4, 137.4, 133.5, 128.39, 128.36, 127.2, 124.3, 116.0, 115.7, 104.7, 104.4, 95.6, 21.5, 18.8, 11.4.

HRMS (ESI) m/z: [M+H]<sup>+</sup> Calcd for C<sub>25</sub>H<sub>33</sub>N<sub>2</sub>Si 389.2407; Found 389.2400.

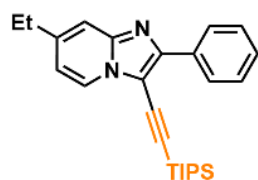

**7-Ethyl-2-phenyl-3-((triisopropylsilyl)ethynyl)imidazo[1,2-*a*]pyridine (3ka).** Following the general procedure **A** using 7-ethyl-2-phenylimidazo[1,2-*a*]pyridine (44.2 mg, 0.2 mmol) and TIPS-protected terminal alkyne (54.7 mg, 0.3 mmol), the residue was purified by flash chromatography on silica gel (petroleum ether/ethyl acetate = 30:1) to afford **3ka** (53.1 mg, 66%) as a brown oil.

<sup>1</sup>H NMR (600 MHz, CDCl<sub>3</sub>) δ 8.39 (d, *J* = 7.4 Hz, 2H), 8.17 (d, *J* = 6.9 Hz, 1H), 7.46 – 7.41 (m, 3H), 7.36 (d, *J* = 7.1 Hz, 1H), 6.80 (d, *J* = 8.1 Hz, 1H), 2.73 (q, *J* = 7.6 Hz, 2H), 1.30 (t, *J* = 7.6 Hz, 3H), 1.25 – 1.18 (m, 21H).

<sup>13</sup>C NMR (151 MHz, CDCl<sub>3</sub>) δ 148.2, 145.5, 143.6, 133.5, 128.38, 128.36, 127.2, 124.5, 114.7, 114.6, 104.7, 104.4, 95.6, 28.5, 18.8, 14.4, 11.4.

HRMS (ESI) m/z: [M+H]<sup>+</sup> Calcd for C<sub>26</sub>H<sub>34</sub>N<sub>2</sub>Si 403.2564; Found 403.2565.

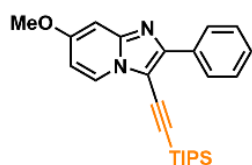

**7-Methoxy-2-phenyl-3-((triisopropylsilyl)ethynyl)imidazo[1,2-*a*]pyridine (3la).** Following the general procedure **A** using 7-methoxy-2-phenylimidazo[1,2-*a*]pyridine (44.8 mg, 0.2 mmol) and TIPS-protected terminal alkyne (54.7 mg, 0.3 mmol), the residue was purified by flash chromatography on silica gel (petroleum ether/ethyl acetate = 30:1) to afford **3la** (59.8 mg, 74%) as a yellow solid. Mp: 132-134 °C.

<sup>1</sup>H NMR (600 MHz, CDCl<sub>3</sub>) δ 8.38 (d, *J* = 7.2 Hz, 2H), 8.06 (d, *J* = 7.4 Hz, 1H), 7.43 (t, *J* = 7.7 Hz, 2H), 7.35 (t, *J* = 7.3 Hz, 1H), 6.94 (d, *J* = 2.3 Hz, 1H), 6.63 (dd, *J* = 7.4, 2.5 Hz, 1H), 3.86 (s, 3H), 1.22 – 1.18 (m, 21H).

<sup>13</sup>C NMR (151 MHz, CDCl<sub>3</sub>) δ 159.2, 148.2, 146.5, 133.5, 128.4, 128.3, 127.0, 125.4, 107.9, 104.22, 104.17, 95.6, 95.1, 55.6, 18.8, 11.4.

HRMS (ESI) m/z: [M+H]<sup>+</sup> Calcd for C<sub>25</sub>H<sub>33</sub>N<sub>2</sub>OSi 405.2356; Found 405.2349.

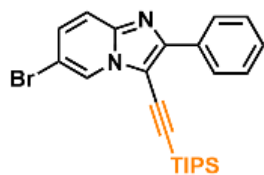

**6-Bromo-2-phenyl-3-((triisopropylsilyl)ethynyl)imidazo[1,2-*a*]pyridine (3pa).** Following the general procedure **A** using 6-bromo-2-phenylimidazo[1,2-*a*]pyridine (54.4 mg, 0.2 mmol) and TIPS-protected terminal alkyne (54.7 mg, 0.3 mmol), the residue was purified by flash chromatography on silica gel (petroleum ether/ethyl acetate = 30:1) to afford **3pa** (54.3 mg, 60%) as a yellow solid. Mp: 95-

97 °C.

**<sup>1</sup>H NMR (600 MHz, CDCl<sub>3</sub>)** δ 8.37 (d, *J* = 8.4 Hz, 3H), 7.55 (d, *J* = 9.4 Hz, 1H), 7.45 (t, *J* = 7.5 Hz, 2H), 7.39 (d, *J* = 7.3 Hz, 1H), 7.34 (dd, *J* = 9.4, 1.8 Hz, 1H), 1.26 – 1.20 (m, 21H).

**<sup>13</sup>C NMR (151 MHz, CDCl<sub>3</sub>)** δ 148.7, 143.3, 132.9, 129.6, 128.8, 128.5, 127.3, 125.4, 118.0, 107.8, 105.9, 18.7, 17.7, 12.3, 11.3.

**HRMS (ESI)** *m/z*: [M+H]<sup>+</sup> Calcd for C<sub>24</sub>H<sub>29</sub>BrN<sub>2</sub>Si 453.1356; Found 453.1357.

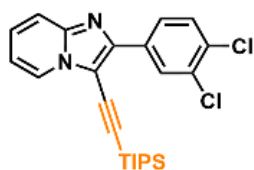

**2-(3,4-Dichlorophenyl)-3-((triisopropylsilyl)ethynyl)imidazo[1,2-*a*]pyridine (3qa).** Following the general procedure **A** using 2-(3,4-dichlorophenyl)imidazo[1,2-*a*]pyridine (52.4 mg, 0.2 mmol) and TIPS-protected terminal alkyne (54.7 mg, 0.3 mmol), the residue was purified by flash chromatography on silica gel (petroleum ether/ethyl acetate = 30:1) to afford **3qa** (59.2 mg, 67%) as a brown solid. Mp: 156-158 °C.

**<sup>1</sup>H NMR (600 MHz, CDCl<sub>3</sub>)** δ 8.52 (d, *J* = 2.0 Hz, 1H), 8.25 – 8.22 (m, 2H), 7.62 (d, *J* = 9.0 Hz, 1H), 7.48 (d, *J* = 8.4 Hz, 1H), 7.30 – 7.25 (m, 1H), 6.93 (td, *J* = 6.8, 1.1 Hz, 1H), 1.23 – 1.18 (m, 21H).

**<sup>13</sup>C NMR (151 MHz, CDCl<sub>3</sub>)** δ 145.6, 145.0, 133.5, 132.7, 132.3, 130.3, 128.7, 126.7, 126.3, 125.2, 117.6, 113.4, 106.1, 105.7, 94.5, 18.8, 11.3.

**HRMS (ESI)** *m/z*: [M+H]<sup>+</sup> Calcd for C<sub>24</sub>H<sub>29</sub>N<sub>2</sub>Cl<sub>2</sub>Si 443.1471; Found 443.1463.

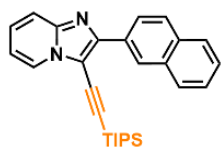

**2-(Naphthalen-2-yl)-3-((triisopropylsilyl)ethynyl)imidazo[1,2-*a*]pyridine (3ra).** Following the general procedure **A** using 2-(naphthalen-2-yl)imidazo[1,2-*a*]pyridine (48.8 mg, 0.2 mmol) and TIPS-protected terminal alkyne (54.7 mg, 0.3 mmol), the residue was purified by flash

chromatography on silica gel (petroleum ether/ethyl acetate = 30:1) to afford **3ra** (63.6 mg, 75%) as a white solid. Mp: 151-153 °C.

**<sup>1</sup>H NMR (600 MHz, CDCl<sub>3</sub>)** δ 8.93 (s, 1H), 8.60 (dd, *J* = 8.6, 1.6 Hz, 1H), 8.31 (d, *J* = 6.7 Hz, 1H), 7.96 – 7.92 (m, 2H), 7.88 – 7.85 (m, 1H), 7.71 (d, *J* = 9.0 Hz, 1H), 7.52 – 7.47 (m, 2H), 7.30 – 7.25 (m, 1H), 6.93 (t, *J* = 6.7 Hz, 1H), 1.30 – 1.24 (m, 21H).

**<sup>13</sup>C NMR (151 MHz, CDCl<sub>3</sub>)** δ 148.1, 145.1, 133.5, 133.5, 130.9, 128.5, 128.0, 127.7, 126.5, 126.4, 126.3, 126.2, 125.1, 125.1, 117.5, 113.2, 105.6, 105.0, 95.4, 18.9, 11.4.

**HRMS (ESI)** *m/z*: [M+H]<sup>+</sup> Calcd for C<sub>28</sub>H<sub>33</sub>N<sub>2</sub>Si 425.2407; Found 425.2401.

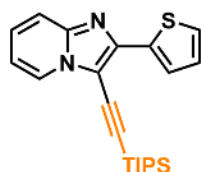

**2-(Thiophen-2-yl)-3-((triisopropylsilyl)ethynyl)imidazo[1,2-*a*]pyridine (3ta).** Following the general procedure **A** using 2-(thiophen-2-yl)imidazo[1,2-*a*]pyridine (40.0 mg, 0.2 mmol) and TIPS-protected terminal alkyne (54.7 mg, 0.3 mmol), the residue was purified by flash chromatography on silica gel (petroleum ether/ethyl acetate = 30:1) to

afford **3ta** (57.8 mg, 76%) as a orange solid. Mp: 105--107 °C.

$^1\text{H NMR}$  (600 MHz,  $\text{CDCl}_3$ )  $\delta$  8.22 (d,  $J$  = 6.7 Hz, 1H), 8.00 (d,  $J$  = 2.8 Hz, 1H), 7.63 (d,  $J$  = 9.0 Hz, 1H), 7.38 (d,  $J$  = 5.0 Hz, 1H), 7.28 (d,  $J$  = 6.8 Hz, 1H), 7.14 – 7.11 (m, 1H), 6.93 (t,  $J$  = 6.8 Hz, 1H), 1.25 – 1.20 (m, 21H).

$^{13}\text{C NMR}$  (151 MHz,  $\text{CDCl}_3$ )  $\delta$  144.9, 144.0, 136.9, 127.6, 126.4, 126.2, 125.8, 125.1, 117.3, 113.2, 106.3, 104.2, 94.4, 18.8, 11.4.

**HRMS (ESI)**  $m/z$ :  $[\text{M}+\text{H}]^+$  Calcd for  $\text{C}_{22}\text{H}_{28}\text{N}_2\text{Si}$  381.1815; Found 381.1816.

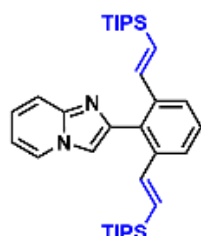

**2-(4-Methoxy-2-((triisopropylsilyl)ethynyl)phenyl)imidazo[1,2-*a*]pyridine (4aa)**. Following the general procedure **B** using 2-phenylimidazopyridine (38.8 mg, 0.2 mmol) and TIPS-protected terminal alkyne (91.2 mg, 0.5 mmol), the residue was purified by flash chromatography on silica gel (petroleum ether/ethyl acetate = 30:1) to afford **4aa** (100.5 mg, 90%) as a white solid. Mp: 159-161 °C.

$^1\text{H NMR}$  (600 MHz,  $\text{CDCl}_3$ )  $\delta$  8.08 (d,  $J$  = 6.7 Hz, 1H), 7.60 – 7.56 (m, 3H), 7.49 (s, 1H), 7.38 (t,  $J$  = 7.7 Hz, 1H), 7.20 – 7.15 (m, 1H), 6.90 (d,  $J$  = 19.4 Hz, 2H), 6.79 (t,  $J$  = 6.7 Hz, 1H), 6.22 (d,  $J$  = 19.4 Hz, 2H), 1.00 – 0.93 (m, 42H).

$^{13}\text{C NMR}$  (151 MHz,  $\text{CDCl}_3$ )  $\delta$  145.5, 144.8, 139.8, 131.0, 128.3, 125.4, 125.1, 124.9, 124.2, 117.7, 113.1, 112.2, 18.5, 11.0.

**HRMS (ESI)**  $m/z$ :  $[\text{M}+\text{H}]^+$  Calcd for  $\text{C}_{35}\text{H}_{54}\text{N}_2\text{Si}_2$  559.3898; Found 559.3901.

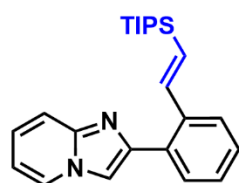

**(E)-2-(2-(2-(triisopropylsilyl)vinyl)phenyl)imidazo[1,2-*a*]pyridine (4aa<sub>1</sub>)**. Following the general procedure **C** using 2-phenylimidazopyridine (38.8 mg, 0.2 mmol) and TIPS-protected terminal alkyne (91.2 mg, 0.5 mmol), the residue was purified by flash chromatography on silica gel (petroleum ether/ethyl acetate = 30:1) to afford **4aa<sub>1</sub>** (28.6 mg, 38%) as a yellow liquid.

$^1\text{H NMR}$  (600 MHz,  $\text{CDCl}_3$ )  $\delta$  8.07 (d,  $J$  = 6.7 Hz, 1H), 7.89 – 7.86 (m, 1H), 7.68 (s, 1H), 7.66 – 7.61 (m, 2H), 7.42 – 7.34 (m, 3H), 7.20 – 7.16 (m, 1H), 6.79 (t,  $J$  = 6.7 Hz, 1H), 6.38 (d,  $J$  = 19.3 Hz, 1H), 1.20 – 1.10 (m, 21H).

$^{13}\text{C NMR}$  (151 MHz,  $\text{CDCl}_3$ )  $\delta$  145.8, 145.0, 144.5, 138.3, 132.1, 129.7, 128.0, 127.8, 126.9, 126.2, 125.4, 124.6, 117.7, 112.4, 112.0, 18.8, 11.1.

**HRMS (ESI)**  $m/z$ :  $[\text{M}+\text{H}]^+$  Calcd for  $\text{C}_{24}\text{H}_{32}\text{N}_2\text{Si}$  377.2407; Found 377.2404.

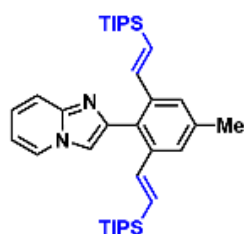

**2-(4-Methyl-2,6-bis((triisopropylsilyl)vinyl)phenyl)imidazo[1,2-*a*]pyridine (4ba)**. Following the general procedure **B** using 2-(*p*-tolyl)imidazo[1,2-*a*]pyridine (41.6 mg, 0.2 mmol) and TIPS-protected terminal alkyne (91.2 mg, 0.5 mmol), the residue was purified by flash chromatography on silica gel (petroleum ether/ethyl acetate = 30:1) to afford **4ba** (105.3 mg, 92%) as a white solid. Mp: 149-151 °C.

$^1\text{H NMR}$  (600 MHz,  $\text{CDCl}_3$ )  $\delta$  8.07 (t,  $J$  = 6.3 Hz, 1H), 7.60 – 7.56 (m, 1H), 7.47 (d,  $J$  = 3.4 Hz, 1H), 7.40 (s, 2H), 7.17 – 7.13 (m, 1H), 6.91 (dd,  $J$  = 18.7, 11.2 Hz, 2H), 6.76 (t,  $J$  = 6.3 Hz, 1H), 6.22 (dd,  $J$  = 19.4, 4.2 Hz, 2H), 2.45 (s, 3H), 1.04 – 0.90 (m, 42H).

$^{13}\text{C NMR}$  (151 MHz,  $\text{CDCl}_3$ )  $\delta$  159.5, 145.4, 144.7, 142.9, 141.2, 125.5, 125.1, 124.3, 124.1,

117.6, 113.2, 112.2, 110.3, 55.4, 18.5, 10.9.

**HRMS (ESI)**  $m/z$ :  $[M+H]^+$  Calcd for  $C_{36}H_{56}F_3N_2Si_2$  573.4003; Found 573.4002.

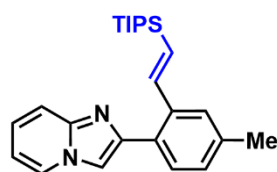

**(E)-2-(4-methyl-2-(2-(triisopropylsilyl)vinyl)phenyl)imidazo[1,2-*a*]pyridine (4ba<sub>1</sub>)**. Following the general procedure **C** using 2-(*p*-tolyl)imidazo[1,2-*a*]pyridine (41.6 mg, 0.2 mmol) and TIPS-protected terminal alkyne (91.2 mg, 0.5 mmol), the residue was purified by flash chromatography on silica gel (petroleum ether/ethyl acetate = 30:1) to afford **4ba<sub>1</sub>** (31.2 mg, 40%) as a yellow liquid.

**<sup>1</sup>H NMR (600 MHz, CDCl<sub>3</sub>)**  $\delta$  8.05 (d,  $J$  = 6.7 Hz, 1H), 7.78 (d,  $J$  = 7.8 Hz, 1H), 7.64 (d,  $J$  = 9.3 Hz, 2H), 7.43 – 7.37 (m, 2H), 7.22 – 7.14 (m, 2H), 6.77 (t,  $J$  = 6.5 Hz, 1H), 6.36 (d,  $J$  = 19.3 Hz, 1H), 2.43 (s, 3H), 1.22 – 1.10 (m, 21H).

**<sup>13</sup>C NMR (151 MHz, CDCl<sub>3</sub>)**  $\delta$  145.9, 145.0, 144.6, 138.1, 137.7, 129.7, 129.4, 128.8, 127.4, 125.8, 125.3, 124.5, 117.6, 112.3, 111.8, 21.4, 18.8, 11.1.

**HRMS (ESI)**  $m/z$ :  $[M+H]^+$  Calcd for  $C_{25}H_{34}N_2Si$  391.2564; Found 391.2560.

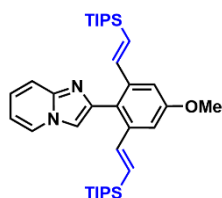

**2-(4-Methoxy-2,6-bis((E)-2-(triisopropylsilyl)vinyl)phenyl)imidazo[1,2-*a*]pyridine (4ca)**. Following the general procedure **B** using 2-(4-methoxyphenyl)imidazo[1,2-*a*]pyridine (44.8 mg, 0.2 mmol) and TIPS-protected terminal alkyne (91.2 mg, 0.5 mmol), the residue was purified by flash chromatography on silica gel (petroleum ether/ethyl acetate = 30:1) to afford **4ca** (105.7 mg, 95%) as a white solid. Mp: 142-144 °C.

**<sup>1</sup>H NMR (600 MHz, CDCl<sub>3</sub>)**  $\delta$  8.06 (d,  $J$  = 5.7 Hz, 1H), 7.56 (d,  $J$  = 9.0 Hz, 1H), 7.45 (s, 1H), 7.18 – 7.14 (m, 1H), 7.11 (s, 2H), 6.89 (d,  $J$  = 19.4 Hz, 2H), 6.76 (t,  $J$  = 6.7 Hz, 1H), 6.21 (d,  $J$  = 19.4 Hz, 2H), 3.92 (s, 3H), 1.03 – 0.90 (m, 42H).

**<sup>13</sup>C NMR (151 MHz, CDCl<sub>3</sub>)**  $\delta$  159.5, 145.5, 144.7, 143.0, 141.2, 125.4, 125.1, 124.4, 124.1, 117.6, 113.2, 112.1, 110.3, 55.4, 18.5, 11.0.

**HRMS (ESI)**  $m/z$ :  $[M+H]^+$  Calcd for  $C_{35}H_{52}N_2Si_2$  557.3741; Found 557.3738.

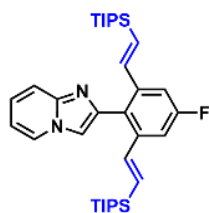

**2-(4-Fluoro-2,6-bis((E)-2-(triisopropylsilyl)vinyl)phenyl)imidazo[1,2-*a*]pyridine (4da)**. Following the general procedure **B** using 2-(4-fluorophenyl)imidazo[1,2-*a*]pyridine (42.4 mg, 0.2 mmol) and TIPS-protected terminal alkyne (91.2 mg, 0.5 mmol), the residue was purified by flash chromatography on silica gel (petroleum ether/ethyl acetate = 30:1) to afford **4da** (102.6mg, 89%) as a brown solid. Mp: 135-137 °C.

**<sup>1</sup>H NMR (600 MHz, CDCl<sub>3</sub>)**  $\delta$  8.08 (d,  $J$  = 6.7 Hz, 1H), 7.57 (d,  $J$  = 9.0 Hz, 1H), 7.47 (s, 1H), 7.25 (d,  $J$  = 9.7 Hz, 2H), 7.20 – 7.16 (m, 1H), 6.85 (d,  $J$  = 19.4 Hz, 2H), 6.79 (t,  $J$  = 7.2 Hz, 1H), 6.24 (d,  $J$  = 19.3 Hz, 2H), 1.04 – 0.91 (m, 42H).

**<sup>13</sup>C NMR (151 MHz, CDCl<sub>3</sub>)**  $\delta$  144.6 (d,  $J$  = 22.3 Hz), 142.1 (d,  $J$  = 6.5 Hz), 126.8, 125.2, 124.4, 117.7, 113.2, 111.6 (d,  $J$  = 8.1 Hz), 18.5, 10.9.

**<sup>19</sup>F NMR (565 MHz, CDCl<sub>3</sub>)**  $\delta$  -114.20 (s).

**HRMS (ESI)** m/z: [M+H]<sup>+</sup> Calcd for C<sub>35</sub>H<sub>53</sub>FN<sub>2</sub>Si<sub>2</sub> 577.3804; Found 577.3807.

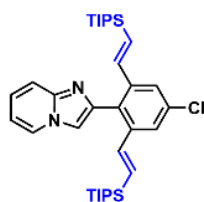

**2-(4-Chloro-2,6-bis((triisopropylsilyl)vinyl)phenyl)imidazo[1,2-*a*]pyridine (4ea).** Following the general procedure **B** using 2-(4-chlorophenyl)imidazo[1,2-*a*]pyridine (45.6 mg, 0.2 mmol) and TIPS-protected terminal alkyne (91.2 mg, 0.5 mmol), the residue was purified by flash chromatography on silica gel (petroleum ether/ethyl acetate = 30:1) to afford **4ea** (103.1 mg, 87%) as a white solid. Mp: 156-158 °C.

**<sup>1</sup>H NMR (600 MHz, CDCl<sub>3</sub>)** δ 8.06 (d, *J* = 6.7 Hz, 1H), 7.56 (d, *J* = 9.0 Hz, 1H), 7.49 (d, *J* = 22.5 Hz, 3H), 7.19 – 7.14 (m, 1H), 6.84 (d, *J* = 19.4 Hz, 2H), 6.77 (t, *J* = 7.1 Hz, 1H), 6.24 (d, *J* = 19.4 Hz, 2H), 1.02 – 0.90 (m, 42H).

**<sup>13</sup>C NMR (151 MHz, CDCl<sub>3</sub>)** δ 144.9, 144.2, 142.1, 141.5, 134.4, 129.5, 127.1, 125.2, 124.6, 124.4, 117.7, 113.2, 112.4, 18.5, 10.9.

**HRMS (ESI)** m/z: [M+H]<sup>+</sup> Calcd for C<sub>35</sub>H<sub>53</sub>ClN<sub>2</sub>Si<sub>2</sub> 593.3508; Found 593.3511.

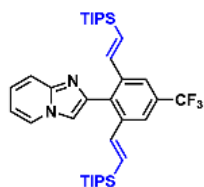

**2-(4-(Trifluoromethyl)-2,6-bis((triisopropylsilyl)vinyl)phenyl)imidazo[1,2-*a*]pyridine (4fa).** Following the general procedure **B** using 2-(4-(trifluoromethyl)phenyl)imidazo[1,2-*a*]pyridine (52.4 mg, 0.2 mmol) and TIPS-protected terminal alkyne (91.2 mg, 0.5 mmol), the residue was purified by flash chromatography on silica gel (petroleum ether/ethyl acetate = 30:1) to afford **4fa** (105.2 mg, 84%) as a white solid. Mp: 133-135 °C.

C.

**<sup>1</sup>H NMR (600 MHz, CDCl<sub>3</sub>)** δ 8.09 (d, *J* = 6.7 Hz, 1H), 7.76 (s, 2H), 7.58 (d, *J* = 9.0 Hz, 1H), 7.51 (d, *J* = 3.3 Hz, 1H), 7.21 – 7.17 (m, 1H), 6.91 (d, *J* = 19.4 Hz, 2H), 6.80 (t, *J* = 6.7 Hz, 1H), 6.30 (d, *J* = 19.4 Hz, 2H), 1.06 – 0.89 (m, 42H).

**<sup>13</sup>C NMR (151 MHz, CDCl<sub>3</sub>)** δ 145.0, 144.3, 141.9, 140.6, 134.2, 127.7, 125.2, 124.6, 121.2, 117.7, 112.9 (q, *J* = 89.0 Hz), 18.5, 10.9.

**<sup>19</sup>F NMR (565 MHz, CDCl<sub>3</sub>)** δ -62.54 (s).

**HRMS (ESI)** m/z: [M+H]<sup>+</sup> Calcd for C<sub>36</sub>H<sub>53</sub>F<sub>3</sub>N<sub>2</sub>Si<sub>2</sub> 627.3772; Found 627.3775.

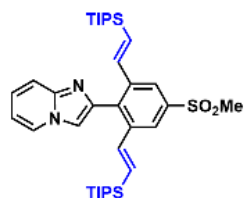

**2-(4-(Methylsulfonyl)-2,6-bis((triisopropylsilyl)vinyl)phenyl)imidazo[1,2-*a*]pyridine (4ga).** Following the general procedure **B** using 2-(4-sulfonylphenyl)imidazo[1,2-*a*]pyridine (54.2 mg, 0.2 mmol) and TIPS-protected terminal alkyne (91.2 mg, 0.5 mmol), the residue was purified by flash chromatography on silica gel (petroleum ether/ethyl acetate = 30:1) to afford **4ga** (99.3 mg, 78%) as a brown solid. Mp: 157-159 °C.

**<sup>1</sup>H NMR (600 MHz, CDCl<sub>3</sub>)** δ 8.10 (d, *J* = 6.8 Hz, 1H), 8.05 (s, 2H), 7.57 (d, *J* = 9.1 Hz, 1H), 7.52 (s, 1H), 7.23 – 7.19 (m, 1H), 6.89 – 6.80 (m, 3H), 6.35 (d, *J* = 19.4 Hz, 2H), 3.12 (s, 3H), 1.03 – 0.88 (m, 42H).

**<sup>13</sup>C NMR (151 MHz, CDCl<sub>3</sub>)** δ 145.1, 143.5, 141.37, 141.35, 140.4, 136.1, 129.1, 125.3, 124.9, 123.0, 117.8, 113.2, 112.8, 44.7, 18.5, 10.9.

**HRMS (ESI)** m/z: [M+H]<sup>+</sup> Calcd for C<sub>36</sub>H<sub>56</sub>N<sub>2</sub>O<sub>2</sub>SSi<sub>2</sub> 637.3673; Found 637.3672.

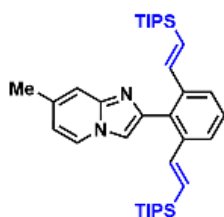

**2-(2,6-Bis((triisopropylsilyl)vinyl)phenyl)-7-methylimidazo[1,2- $\alpha$ ]pyridine (4ja).** Following the general procedure **B** using 7-methyl-2-phenylimidazo[1,2- $\alpha$ ]pyridine (41.6 mg, 0.2 mmol) and TIPS-protected terminal alkyne (91.2 mg, 0.5 mmol), the residue was purified by flash chromatography on silica gel (petroleum ether/ethyl acetate = 30:1) to afford **4ja** (104.2 mg, 91%) as a yellow solid. Mp: 125-127 °C.

$^1\text{H NMR}$  (600 MHz,  $\text{CDCl}_3$ )  $\delta$  7.95 (d,  $J$  = 6.8 Hz, 1H), 7.57 (d,  $J$  = 7.8 Hz, 2H), 7.42 – 7.31 (m, 3H), 6.92 (d,  $J$  = 19.4 Hz, 2H), 6.61 (d,  $J$  = 6.3 Hz, 1H), 6.22 (d,  $J$  = 19.4 Hz, 2H), 2.41 (s, 3H), 1.03 – 0.92 (m, 42H).

$^{13}\text{C NMR}$  (151 MHz,  $\text{CDCl}_3$ )  $\delta$  145.7, 145.3, 142.7, 139.8, 135.0, 131.3, 128.2, 125.1, 124.9, 124.3, 116.0, 114.9, 112.6, 21.4, 18.5, 11.0.

**HRMS (ESI)**  $m/z$ :  $[\text{M}+\text{H}]^+$  Calcd for  $\text{C}_{36}\text{H}_{56}\text{N}_2\text{Si}_2$  573.4003; Found 573.4001.

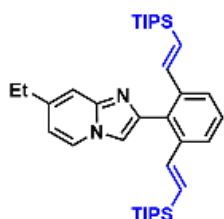

**2-(2,6-Bis((triisopropylsilyl)vinyl)phenyl)-7-ethylimidazo[1,2- $\alpha$ ]pyridine (4ka).** Following the general procedure **B** using 7-ethyl-2-phenylimidazo[1,2- $\alpha$ ]pyridine (44.3 mg, 0.2 mmol) and TIPS-protected terminal alkyne (91.2 mg, 0.5 mmol), the residue was purified by flash chromatography on silica gel (petroleum ether/ethyl acetate = 30:1) to afford **4ka** (104.4 mg, 89%) as a yellow solid. Mp: 129-131 °C.

$^1\text{H NMR}$  (600 MHz,  $\text{CDCl}_3$ )  $\delta$  7.97 (d,  $J$  = 6.8 Hz, 1H), 7.57 (d,  $J$  = 7.8 Hz, 2H), 7.42 (s, 1H), 7.39 – 7.33 (m, 2H), 6.94 (d,  $J$  = 19.4 Hz, 2H), 6.64 (d,  $J$  = 5.7 Hz, 1H), 6.23 (d,  $J$  = 19.4 Hz, 2H), 2.71 (q,  $J$  = 7.5 Hz, 2H), 1.31 (t,  $J$  = 7.6 Hz, 3H), 1.04 – 0.92 (m, 42H).

$^{13}\text{C NMR}$  (151 MHz,  $\text{CDCl}_3$ )  $\delta$  145.7, 145.4, 142.7, 141.2, 139.8, 131.3, 128.1, 125.1, 124.9, 124.5, 114.6, 113.9, 112.5, 28.5, 18.6, 14.6, 11.0.

**HRMS (ESI)**  $m/z$ :  $[\text{M}+\text{H}]^+$  Calcd for  $\text{C}_{37}\text{H}_{58}\text{N}_2\text{Si}_2$  587.4211; Found 587.4214.

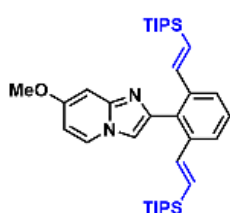

**2-(2,6-Bis((triisopropylsilyl)vinyl)phenyl)-7-methoxyimidazo[1,2- $\alpha$ ]pyridine (4la).** Following the general procedure **B** using 7-methoxy-2-phenylimidazo[1,2- $\alpha$ ]pyridine (44.8 mg, 0.2 mmol) and TIPS-protected terminal alkyne (91.2 mg, 0.5 mmol), the residue was purified by flash chromatography on silica gel (petroleum ether/ethyl acetate = 30:1) to afford **4la** (109.4 mg, 93%) as a white solid. Mp: 154-157 °C.

$^1\text{H NMR}$  (600 MHz,  $\text{CD}_3\text{OD}$ )  $\delta$  7.87 (d,  $J$  = 7.3 Hz, 1H), 7.57 (d,  $J$  = 7.8 Hz, 2H), 7.36 (t,  $J$  = 7.8 Hz, 1H), 7.31 (d,  $J$  = 3.4 Hz, 1H), 6.94 (d,  $J$  = 19.4 Hz, 2H), 6.83 (d,  $J$  = 2.3 Hz, 1H), 6.51 (dd,  $J$  = 7.4, 2.4 Hz, 1H), 6.26 – 6.19 (m, 2H), 3.86 (s, 3H), 1.03 – 0.92 (m, 42H).

$^{13}\text{C NMR}$  (151 MHz,  $\text{CD}_3\text{OD}$ )  $\delta$  157.6, 146.2, 145.7, 142.5, 139.8, 131.2, 128.2, 125.5, 125.1, 124.9, 111.9, 107.3, 94.7, 55.5, 18.6, 11.0.

**HRMS (ESI)**  $m/z$ :  $[\text{M}+\text{H}]^+$  Calcd for  $\text{C}_{36}\text{H}_{56}\text{N}_2\text{OSi}_2$  589.4003; Found 589.4003.

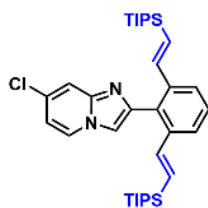

**2-(2,6-Bis((triisopropylsilyl)vinyl)phenyl)-7-chloroimidazo[1,2-*a*]pyridine (4ma).** Following the general procedure **B** using 7-chloro-2-phenylimidazo[1,2-*a*]pyridine (45.6 mg, 0.2 mmol) and TIPS-protected terminal alkyne (91.2 mg, 0.5 mmol), the residue was purified by flash chromatography on silica gel (petroleum ether/ethyl acetate = 30:1) to afford **4ma** (101.9 mg, 86%) as a white solid. Mp: 158-160 °C.

**<sup>1</sup>H NMR (600 MHz, CDCl<sub>3</sub>)** δ 8.01 (d, *J* = 7.1 Hz, 1H), 7.60 – 7.56 (m, 3H), 7.48 (s, 1H), 7.39 (t, *J* = 7.8 Hz, 1H), 6.86 (d, *J* = 19.4 Hz, 2H), 6.80 (dd, *J* = 7.2, 2.0 Hz, 1H), 6.24 (d, *J* = 19.4 Hz, 2H), 1.03 – 0.94 (m, 42H).

**<sup>13</sup>C NMR (151 MHz, CDCl<sub>3</sub>)** δ 145.3, 144.6, 144.2, 139.8, 130.7, 130.4, 128.5, 125.8, 125.4, 125.0, 116.4, 114.0, 113.3, 18.5, 10.9.

**HRMS (ESI)** *m/z*: [M+H]<sup>+</sup> Calcd for C<sub>35</sub>H<sub>35</sub>ClN<sub>2</sub>Si<sub>2</sub> 593.3508; Found 593.3511.

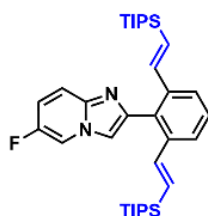

**2-(2,6-Bis((triisopropylsilyl)vinyl)phenyl)-6-fluoroimidazo[1,2-*a*]pyridine (4na).** Following the general procedure **B** using 6-fluoro-2-phenylimidazo[1,2-*a*]pyridine (42.4 mg, 0.2 mmol) and TIPS-protected terminal alkyne (91.2 mg, 0.5 mmol), the residue was purified by flash chromatography on silica gel (petroleum ether/ethyl acetate = 30:1) to afford **4na** (99.1 mg, 86%) as a white solid. Mp: 138-140 °C.

**<sup>1</sup>H NMR (600 MHz, CDCl<sub>3</sub>)** δ 8.05 – 8.02 (m, 1H), 7.57 (t, *J* = 7.4 Hz, 3H), 7.51 (d, *J* = 3.5 Hz, 1H), 7.38 (t, *J* = 7.8 Hz, 1H), 7.12 (ddd, *J* = 10.2, 8.1, 2.3 Hz, 1H), 6.86 (d, *J* = 19.4 Hz, 2H), 6.23 (d, *J* = 19.4 Hz, 2H), 1.04 – 0.93 (m, 42H).

**<sup>13</sup>C NMR (151 MHz, CDCl<sub>3</sub>)** δ 145.3, 142.6, 139.8, 130.6, 128.5, 125.7, 125.0, 118.1 (d, *J* = 9.1 Hz), 116.3 (d, *J* = 24.2 Hz), 114.4 (d, *J* = 3.0 Hz), 111.7 (d, *J* = 40.8 Hz), 18.5, 11.0.

**<sup>19</sup>F NMR (565 MHz, CDCl<sub>3</sub>)** δ -140.96 (s).

**HRMS (ESI)** *m/z*: [M+H]<sup>+</sup> Calcd for C<sub>35</sub>H<sub>53</sub>FN<sub>2</sub>Si<sub>2</sub> 577.3804; Found 577.3807.

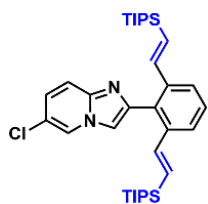

**2-(2,6-Bis((triisopropylsilyl)vinyl)phenyl)-6-chloroimidazo[1,2-*a*]pyridine (4oa).** Following the general procedure **B** using 6-chloro-2-phenylimidazo[1,2-*a*]pyridine (45.6 mg, 0.2 mmol) and TIPS-protected terminal alkyne (91.2 mg, 0.5 mmol), the residue was purified by flash chromatography on silica gel (petroleum ether/ethyl acetate = 30:1) to afford **4oa** (97.1 mg, 82%) as a white solid. Mp: 93-95 °C.

**<sup>1</sup>H NMR (600 MHz, CDCl<sub>3</sub>)** δ 8.14 (dd, *J* = 1.9, 0.7 Hz, 1H), 7.57 (d, *J* = 7.8 Hz, 2H), 7.54 (d, *J* = 9.5 Hz, 1H), 7.48 (s, 1H), 7.39 (t, *J* = 7.8 Hz, 1H), 7.16 (dd, *J* = 9.5, 1.9 Hz, 1H), 6.85 (d, *J* = 19.4 Hz, 2H), 6.24 (d, *J* = 19.4 Hz, 2H), 1.00 – 0.95 (m, 42H).

**<sup>13</sup>C NMR (151 MHz, CDCl<sub>3</sub>)** δ 145.2, 144.2, 143.2, 139.8, 130.4, 128.5, 125.8, 125.7, 125.1, 122.9, 120.5, 118.0, 113.5, 18.5, 10.9.

**HRMS (ESI)** *m/z*: [M+H]<sup>+</sup> Calcd for C<sub>35</sub>H<sub>53</sub>ClN<sub>2</sub>Si<sub>2</sub> 593.3508; Found 593.3510.

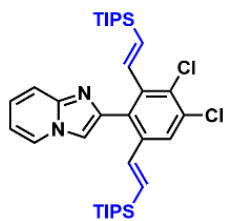

**2-(3,4-Dichloro-2,6-bis((triisopropylsilyl)vinyl)phenyl)imidazo[1,2- $\alpha$ ]pyridine (4qa).** Following the general procedure **B** using 2-(3,4-dichlorophenyl)imidazo[1,2- $\alpha$ ]pyridine (52.4 mg, 0.2 mmol) and TIPS-protected terminal alkyne (91.2 mg, 0.5 mmol), the residue was purified by flash chromatography on silica gel (petroleum ether/ethyl acetate = 30:1) to afford **4qa** (67.6 mg, 54%) as a white solid. Mp: 148-151 °C.

$^1\text{H NMR}$  (600 MHz,  $\text{CDCl}_3$ )  $\delta$  8.02 (d,  $J$  = 6.7 Hz, 1H), 7.61 (s, 1H), 7.53 (d,  $J$  = 9.0 Hz, 1H), 7.37 (s, 1H), 7.16 – 7.12 (m, 1H), 6.83 (d,  $J$  = 19.7 Hz, 1H), 6.75 (t,  $J$  = 6.7 Hz, 1H), 6.67 (d,  $J$  = 19.4 Hz, 1H), 6.21 (d,  $J$  = 19.4 Hz, 1H), 5.71 (d,  $J$  = 19.7 Hz, 1H), 0.95 – 0.78 (m, 42H).

$^{13}\text{C NMR}$  (151 MHz,  $\text{CDCl}_3$ )  $\delta$  144.9, 143.3, 142.3, 142.0, 139.6, 133.8, 133.1, 129.8, 127.4, 125.2, 117.7, 112.4, 112.1, 18.4, 18.2, 10.9, 10.6.

**HRMS (ESI)**  $m/z$ :  $[\text{M}+\text{H}]^+$  Calcd for  $\text{C}_{35}\text{H}_{52}\text{Cl}_2\text{N}_2\text{Si}_2$  627.3118; Found 627.3121.

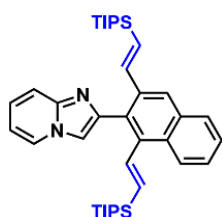

**2-(1,3-Bis(2-(triisopropylsilyl)vinyl)naphthalen-2-yl)imidazo[1,2- $\alpha$ ]pyridine (4ra).** Following the general procedure **B** using 2-(naphthalen-2-yl)imidazo[1,2- $\alpha$ ]pyridine (48.8 mg, 0.2 mmol) and TIPS-protected terminal alkyne (91.2 mg, 0.5 mmol), the residue was purified by flash chromatography on silica gel (petroleum ether/ethyl acetate = 30:1) to afford **4ra** (48.7 mg, 40%) as a white solid. Mp: 144-146 °C.

$^1\text{H NMR}$  (600 MHz,  $\text{CDCl}_3$ )  $\delta$  8.17 (d,  $J$  = 8.0 Hz, 1H), 8.07 – 8.00 (m, 2H), 7.91 (d,  $J$  = 9.1 Hz, 1H), 7.60 (d,  $J$  = 9.0 Hz, 1H), 7.52 – 7.44 (m, 3H), 7.23 (s, 1H), 7.18 – 7.14 (m, 1H), 6.95 (d,  $J$  = 19.3 Hz, 1H), 6.76 (t,  $J$  = 6.7 Hz, 1H), 6.35 (d,  $J$  = 19.3 Hz, 1H), 5.93 (d,  $J$  = 19.8 Hz, 1H), 1.07 – 0.90 (m, 42H).

$^{13}\text{C NMR}$  (151 MHz,  $\text{CDCl}_3$ )  $\delta$  145.9, 144.0, 139.5, 137.9, 133.7, 133.0, 130.8, 128.5, 126.1, 126.0, 125.9, 125.7, 125.1, 123.4, 117.7, 112.5, 112.1, 18.5, 18.4, 11.0, 10.8.

**HRMS (ESI)**  $m/z$ :  $[\text{M}+\text{H}]^+$  Calcd for  $\text{C}_{39}\text{H}_{56}\text{N}_2\text{Si}_2$  609.4054; Found 609.4056.

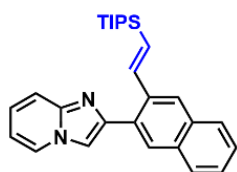

**2-(3-((Triisopropylsilyl)vinyl)naphthalen-2-yl)imidazo[1,2- $\alpha$ ]pyridine (4ra<sub>1</sub>).** Following the general procedure **B** using 2-(naphthalen-2-yl)imidazo[1,2- $\alpha$ ]pyridine (48.8 mg, 0.2 mmol) and TIPS-protected terminal alkyne (91.2 mg, 0.5 mmol), the residue was purified by flash chromatography on silica gel (petroleum ether/ethyl acetate = 30:1) to

afford **4ra<sub>1</sub>** (46.9 mg, 55%) as a white solid. Mp: 117-119 °C.

$^1\text{H NMR}$  (600 MHz,  $\text{CDCl}_3$ )  $\delta$  8.39 (d,  $J$  = 2.9 Hz, 1H), 8.08 (t,  $J$  = 6.2 Hz, 1H), 8.02 (s, 1H), 7.89 (t,  $J$  = 7.8 Hz, 2H), 7.79 – 7.73 (m, 1H), 7.70 (dd,  $J$  = 8.8, 3.4 Hz, 1H), 7.54 – 7.44 (m, 3H), 7.23 – 7.18 (m, 1H), 6.80 (t,  $J$  = 6.6 Hz, 1H), 6.52 (dd,  $J$  = 19.1, 8.9 Hz, 1H), 1.25 – 0.98 (m, 21H).

$^{13}\text{C NMR}$  (151 MHz,  $\text{CDCl}_3$ )  $\delta$  146.3, 146.1, 145.1, 144.5, 137.0, 133.0, 130.5, 128.7, 128.1, 127.8, 126.9, 126.3, 126.1, 125.4, 124.8, 117.6, 112.5, 112.1, 18.8, 11.5, 11.2.

**HRMS (ESI)**  $m/z$ :  $[\text{M}+\text{H}]^+$  Calcd for  $\text{C}_{28}\text{H}_{34}\text{N}_2\text{Si}$  427.2564; Found 427.2567.

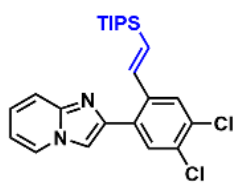

**2-(4,5-Dichloro-2-((triisopropylsilyl)vinyl)phenyl)imidazo[1,2- $\alpha$ ]pyridine (4qa<sub>1</sub>).** Following the general procedure **B** using 2-(3,4-dichlorophenyl)imidazo[1,2- $\alpha$ ]pyridine (52.4 mg, 0.2 mmol) and TIPS-protected terminal alkyne (91.2 mg, 0.5 mmol), the residue was purified by flash chromatography on silica gel (petroleum ether/ethyl acetate = 30:1) to afford **4qa<sub>1</sub>** (36.4 mg, 41%) as a white solid. Mp: 121-123 °C.

<sup>1</sup>H NMR (600 MHz, CDCl<sub>3</sub>)  $\delta$  8.07 (t,  $J$  = 6.0 Hz, 1H), 8.00 (d,  $J$  = 3.9 Hz, 1H), 7.68 – 7.62 (m, 3H), 7.28 (dd,  $J$  = 19.2, 14.1 Hz, 1H), 7.24 – 7.19 (m, 1H), 6.82 (t,  $J$  = 6.7 Hz, 1H), 6.39 (d,  $J$  = 19.3 Hz, 1H), 1.25 – 1.03 (m, 21H).

<sup>13</sup>C NMR (151 MHz, CDCl<sub>3</sub>)  $\delta$  145.1, 143.4, 137.9, 131.9, 131.8, 131.6, 131.18, 131.17, 128.7, 128.6, 125.5, 125.2, 117.7, 112.8, 112.2, 18.7, 11.1.

HRMS (ESI)  $m/z$ : [M+H]<sup>+</sup> Calcd for C<sub>24</sub>H<sub>30</sub>Cl<sub>2</sub>N<sub>2</sub>Si 445.1628; Found 445.1629.

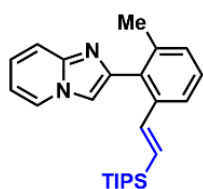

**2-(2-Methyl-6-((triisopropylsilyl)vinyl)phenyl)imidazo[1,2- $\alpha$ ]pyridine (4sa).** Following the general procedure **B** using 2-(*o*-tolyl)imidazo[1,2- $\alpha$ ]pyridine (41.7 mg, 0.2 mmol) and TIPS-protected terminal alkyne (91.2 mg, 0.5 mmol), the residue was purified by flash chromatography on silica gel (petroleum ether/ethyl acetate = 30:1) to afford **4sa** (68.7 mg, 88%) as a yellow solid. Mp: 140-141 °C.

<sup>1</sup>H NMR (600 MHz, CDCl<sub>3</sub>)  $\delta$  8.11 (d,  $J$  = 6.7 Hz, 1H), 7.62 (d,  $J$  = 9.1 Hz, 1H), 7.48 (d,  $J$  = 10.1 Hz, 2H), 7.29 (t,  $J$  = 7.7 Hz, 1H), 7.19 (dd,  $J$  = 14.1, 7.6 Hz, 2H), 6.82 – 6.74 (m, 2H), 6.18 (d,  $J$  = 19.4 Hz, 1H), 2.25 (s, 3H), 0.98 – 0.91 (m, 21H).

<sup>13</sup>C NMR (151 MHz, CDCl<sub>3</sub>)  $\delta$  145.7, 144.9, 143.7, 139.9, 137.9, 132.4, 129.2, 128.2, 125.3, 125.1, 124.3, 123.1, 117.6, 112.3, 112.2, 20.7, 18.5, 10.9.

HRMS (ESI)  $m/z$ : [M+H]<sup>+</sup> Calcd for C<sub>25</sub>H<sub>34</sub>N<sub>2</sub>Si 391.2564; Found 391.2565.

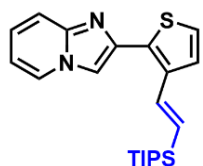

**2-(3-((Triisopropylsilyl)vinyl)thiophen-2-yl)imidazo[1,2- $\alpha$ ]pyridine (4ta).** Following the general procedure **B** using 2-(thiophen-2-yl)imidazo[1,2- $\alpha$ ]pyridine (40.0 mg, 0.2 mmol) and TIPS-protected terminal alkyne (91.2 mg, 0.5 mmol), the residue was purified by flash chromatography on silica gel (petroleum ether/ethyl acetate = 30:1) to afford **4ta** (65.7 mg, 86%) as a white solid. Mp: 125-127 °C.

<sup>1</sup>H NMR (600 MHz, CDCl<sub>3</sub>)  $\delta$  8.09 (d,  $J$  = 6.7 Hz, 1H), 7.65 – 7.61 (m, 2H), 7.38 – 7.32 (m, 2H), 7.27 (s, 1H), 7.20 – 7.16 (m, 1H), 6.79 (t,  $J$  = 6.7 Hz, 1H), 6.29 (d,  $J$  = 19.3 Hz, 1H), 1.19 – 1.10 (m, 21H).

<sup>13</sup>C NMR (151 MHz, CDCl<sub>3</sub>)  $\delta$  145.2, 140.0, 139.0, 138.2, 133.1, 126.6, 125.5, 125.4, 125.1, 125.0, 117.5, 112.6, 109.4, 18.8, 11.1.

HRMS (ESI)  $m/z$ : [M+H]<sup>+</sup> Calcd for C<sub>22</sub>H<sub>30</sub>N<sub>2</sub>Si 383.1971; Found 383.1974

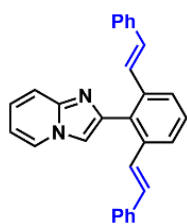

**2-(2,6-Di((styrylphenyl)imidazo[1,2-*a*]pyridine (4ab).** Following the general procedure **B** using 2-phenylimidazopyridine (38.8 mg, 0.2 mmol) and TIPS-protected terminal alkyne (91.2 mg, 0.5 mmol), the residue was purified by flash chromatography on silica gel (petroleum ether/ethyl acetate = 30:1) to afford **4ab** (29.5 mg, 37%) as a yellow solid. Mp: 172-174 °C.

**<sup>1</sup>H NMR (600 MHz, CDCl<sub>3</sub>)** δ 8.29 (s, 1H), 8.23 (d, *J* = 4.0 Hz, 1H), 7.79 (dd, *J* = 15.2, 7.8 Hz, 5H), 7.49 (dd, *J* = 15.4, 8.0 Hz, 7H), 7.40 (dd, *J* = 16.0, 8.1 Hz, 4H), 6.95 (d, *J* = 8.4 Hz, 2H), 6.78 – 6.74 (m, 2H).

**<sup>13</sup>C NMR (151 MHz, CDCl<sub>3</sub>)** δ 155.8, 148.3, 138.5, 137.7, 135.8, 133.7, 129.8, 129.6, 128.9, 127.9, 127.6, 126.9, 126.4, 124.6, 115.5, 115.3, 109.3.

**HRMS (ESI)** *m/z*: [M+H]<sup>+</sup> Calcd for C<sub>29</sub>H<sub>22</sub>N<sub>2</sub> 399.1855; Found 399.1857.

### 3.4 Pd(II)-catalyzed oxidative C3-alkylation: reaction on 3 mmol scale

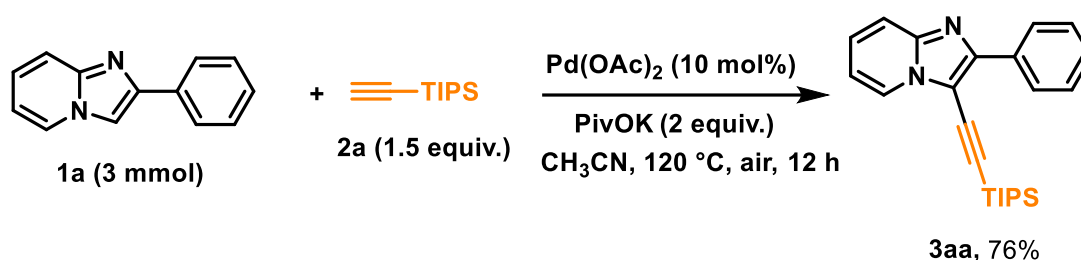

To a 100 mL oven dried Schlenk tube, PivOK (853.4 mg, 6 mmol, 2 equiv.), 2-phenylimidazopyridine (582.7 mg, 3 mmol, 1 equiv.), Pd(OAc)<sub>2</sub> (67.4 mg, 0.3 mmol, 10 mol%), TIPS-protected terminal alkyne (820.7 mg, 4.5 mmol, 1.5 equiv.) and CH<sub>3</sub>CN (20 mL) were successively added. The reaction mixture was stirred at 120 °C (metal sand bath temperature) for 12 hours under air. After cooling the reaction at room temperature and concentration, the crude mixture was purified by silica column chromatography to afford the desired alkynylated product **3aa** (0.85 g, 76%).

### 3.5 Rh(I)-catalyzed *ortho*-alkenylation: reaction on 3 mmol scale

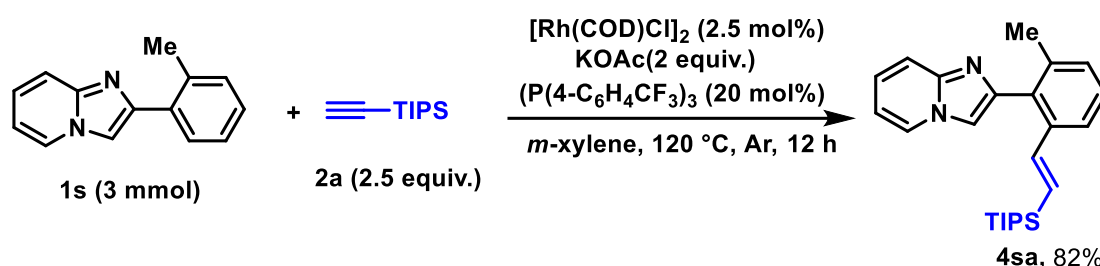

To a 100 mL oven dried Schlenk tube, (P(4-C<sub>6</sub>H<sub>4</sub>CF<sub>3</sub>)<sub>3</sub>)<sub>3</sub> (279.8 mg, 0.6 mmol, 20 mol%), 2-(*o*-tolyl)imidazo[1,2-*a*]pyridine (624.8 mg, 3 mmol, 1 equiv.), [Rh(COD)Cl]<sub>2</sub> (37.0 mg, 0.075 mmol, 2.5 mol%), TIPS-protected alkyne (1.4 g, 7.5 mmol, 2.5 equiv.), and *m*-xylene (20 mL) were successively added. The reaction mixture was stirred at 120 °C (metal sand bath temperature) for 12 hours under Ar. After cooling the reaction at room temperature and concentration, the crude mixture was purified by silica column chromatography to afford the desired alkenylated product **4sa** (0.96 g, 82%).

### 3.6 Preparation and characterization of products 5, 6, 7, 8, 9, 10, 11

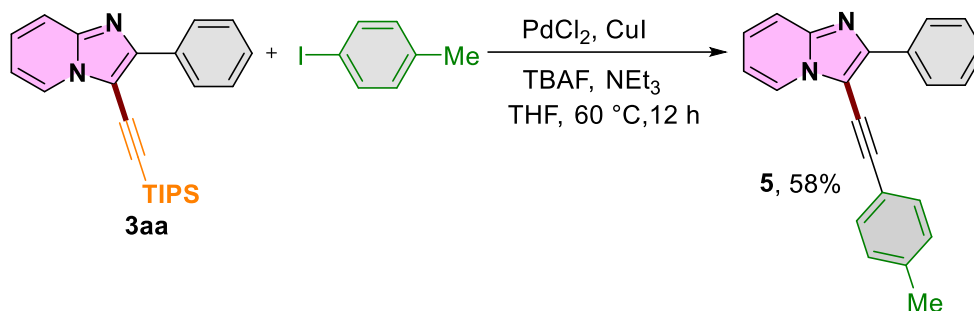

**2-Phenyl-3-(*p*-tolylethynyl)imidazo[1,2-*a*]pyridine (5).** To oven dried Schlenk tube equipped with magnetic stir bar was introduced 1-methyl-4-iodobenzene (43.6 mg, 0.2 mmol), PdCl<sub>2</sub> (1.8 mg, 0.01 mmol, 5 mol%), CuI (1.1 mg, 0.006 mmol, 3.0 mol%) and Et<sub>3</sub>N (1.5 mL). To this mixture, a solution of **3aa** (74.9 mg, 0.2 mmol) in THF/Et<sub>3</sub>N (1/0.5 mL) was added dropwise at room temperature. Then, the reaction mixture was stirred at 60 °C in a pre-heated metal sand bath for 12 hours. At ambient temperature, H<sub>2</sub>O (5 mL) was added and the compound was extracted with EtOAc (15 mL × 3). The combined organic extract was dried over MgSO<sub>4</sub> and the volatiles were evaporated in vacuo. The remaining residue was purified by column chromatography (petroleum ether/ethyl acetate = 9:1) to afford the white solid **5** (35.7 mg, 58%). Mp: 111-113 °C.

<sup>1</sup>H NMR (600 MHz, CDCl<sub>3</sub>) δ 8.38 (t, *J* = 7.9 Hz, 3H), 7.68 (d, *J* = 9.0 Hz, 1H), 7.52 – 7.47 (m, 4H), 7.39 (t, *J* = 7.4 Hz, 1H), 7.31 – 7.27 (m, 1H), 7.22 (d, *J* = 7.9 Hz, 2H), 6.93 (t, *J* = 6.7 Hz, 1H), 2.41 (s, 3H).

<sup>13</sup>C NMR (151 MHz, CDCl<sub>3</sub>) δ 147.7, 145.2, 139.1, 133.5, 131.2, 129.4, 128.6, 128.5, 127.3, 126.2, 125.2, 119.7, 117.5, 112.9, 104.9, 101.4, 29.7, 21.6.

HRMS (ESI) *m/z*: [M+H]<sup>+</sup> Calcd for C<sub>22</sub>H<sub>16</sub>N<sub>2</sub> 309.1386; Found 309.1387.

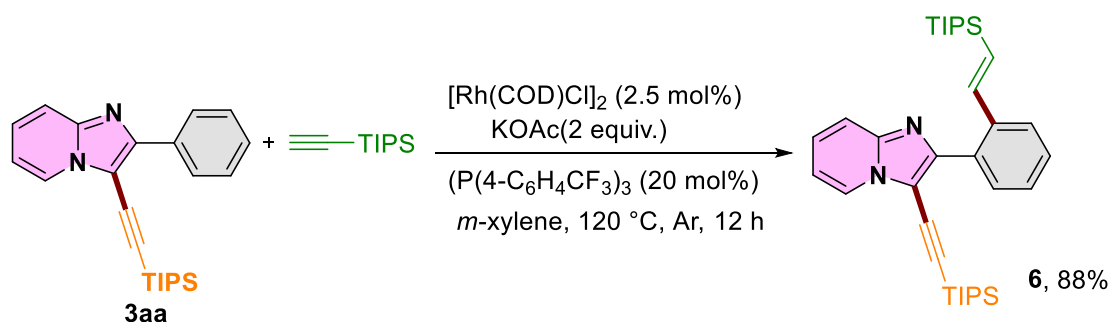

**(*E*)-3-((triisopropylsilyl)ethynyl)-2-(2-(2-(triisopropylsilyl)vinyl)phenyl)imidazo[1,2-*a*]pyridine (6).** To a 15 mL oven dried Schlenk tube, **3aa** (74.9 mg, 0.2 mmol), P(4-C<sub>6</sub>H<sub>4</sub>CF<sub>3</sub>)<sub>3</sub> (18.7 mg, 0.04 mmol, 20 mol%), [Rh(cod)Cl]<sub>2</sub> (2.5 mg, 0.005 mmol, 2.5 mol%), KOAc (0.4 mmol, 2 equiv.), TIPS-protected alkyne (0.5 mmol, 2.5 equiv.), and *m*-xylene (1.5 mL) were successively added. The reaction mixture was stirred at 120 °C (metal sand bath temperature) for 12 hours under Ar. After cooling the reaction at room temperature and concentration, the crude mixture was purified by silica column chromatography (petroleum ether/ethyl acetate = 30:1) to afford the brown liquid **6** (100.7 mg, 88%).

$^1\text{H NMR}$  (600 MHz,  $\text{CDCl}_3$ )  $\delta$  8.29 (d,  $J = 6.7$  Hz, 1H), 7.90 (d,  $J = 7.5$  Hz, 1H), 7.75 (d,  $J = 7.8$  Hz, 1H), 7.62 – 7.51 (m, 2H), 7.39 (t,  $J = 7.5$  Hz, 1H), 7.31 (t,  $J = 7.4$  Hz, 1H), 7.26 – 7.21 (m, 1H), 6.91 (t,  $J = 6.7$  Hz, 1H), 6.38 (d,  $J = 19.3$  Hz, 1H), 1.18 – 1.03 (m, 42H).

$^{13}\text{C NMR}$  (151 MHz,  $\text{CDCl}_3$ )  $\delta$  150.1, 145.8, 144.4, 138.7, 131.5, 130.7, 128.5, 127.1, 126.4, 125.7, 125.2, 124.6, 117.6, 113.0, 107.1, 103.3, 94.7, 18.8, 18.7, 11.3, 11.2.

**HRMS (ESI)**  $m/z$ :  $[\text{M}+\text{H}]^+$  Calcd for  $\text{C}_{36}\text{H}_{56}\text{N}_2\text{Si}_2$  573.4003; Found 573.3998.

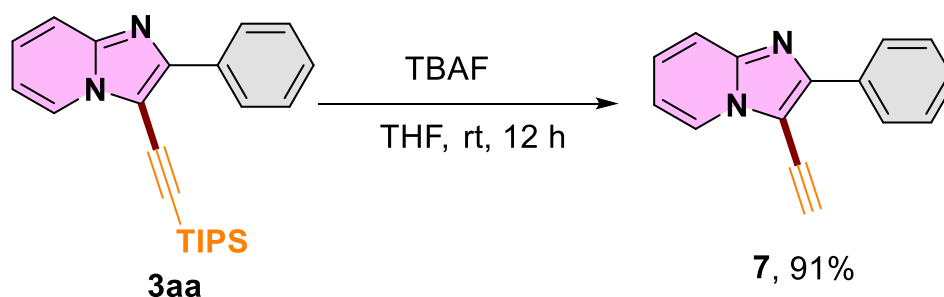

**3-Ethynyl-2-phenylimidazo[1,2-*a*]pyridine (7).** The alkynylated product **3aa** (74.9 mg, 0.2 mmol) was dissolved in THF (1.5 mL). TBAF (1.0 M in THF, 0.6 mL) were then added. The resulting solution was allowed to stir at room temperature. After 12 hours, the mixture was concentrated in vacuo. The residue was extracted with EtOAc (3  $\times$  15 mL), and the combined organic layers were washed with brine (10 mL), dried over  $\text{MgSO}_4$ , filtered and evaporated in vacuo. The obtained crude product was purified by column chromatography (petroleum ether/ethyl acetate = 3:1) to afford the white solid **7** (39.7 mg, 91%). Mp: 122-124  $^\circ\text{C}$ .

$^1\text{H NMR}$  (600 MHz,  $\text{CDCl}_3$ )  $\delta$  8.31 (d,  $J = 7.2$  Hz, 2H), 8.25 (d,  $J = 6.8$  Hz, 1H), 7.63 (d,  $J = 9.0$  Hz, 1H), 7.47 (t,  $J = 7.7$  Hz, 2H), 7.37 (t,  $J = 7.9$  Hz, 1H), 7.25 – 7.20 (m, 1H), 6.85 (t,  $J = \text{CDCl}_3$  7.3 Hz, 1H), 4.05 (s, 1H).

$^{13}\text{C NMR}$  (151 MHz,  $\text{CDCl}_3$ )  $\delta$  148.8, 145.2, 133.2, 128.7, 128.6, 127.3, 126.5, 125.2, 117.5, 113.1, 103.8, 89.9, 73.2.

**HRMS (ESI)**  $m/z$ :  $[\text{M}+\text{H}]^+$  Calcd for  $\text{C}_{15}\text{H}_{11}\text{N}_2$  219.0916; Found 219.0912.

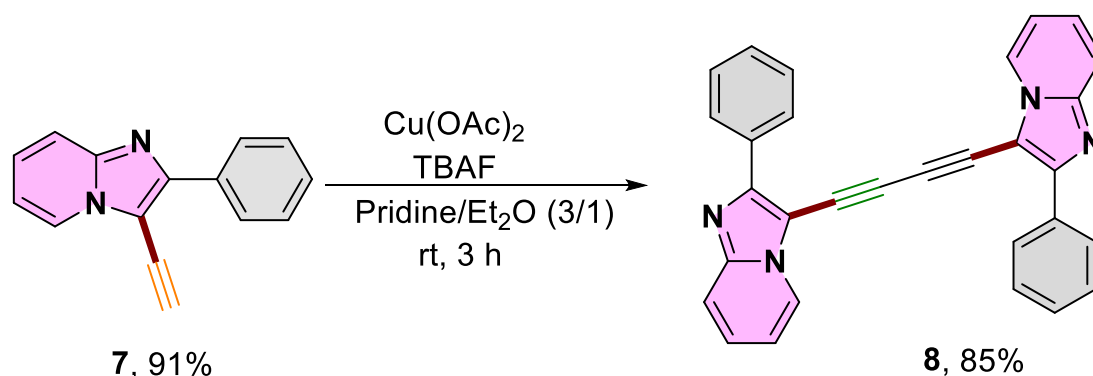

**1,4-Bis(2-phenylimidazo[1,2-*a*]pyridin-3-yl)buta-1,3-diyne (8).** To a 15 mL oven dried Schlenk tube, **7** (43.7 mg, 0.2 mmol),  $\text{Cu}(\text{OAc})_2$  (109 mg, 0.6 mmol, 3 equiv.), TBAF (1 M in THF, 0.4 mL), and pyridine/ether (3:1, 2 mL) were successively added. The reaction mixture was stirred at room temperature for 3 hours under the air. Afterwards, the reaction mixture was poured into

ether and HCl (1M), the organic phase was washed with an excess of HCl (1M) to remove the pyridine, and the organic phase was dried with anhydrous magnesium sulfate, after which the organic phase was concentrated, the crude product was purified by silica column chromatography (petroleum ether/ethyl acetate = 3:1) to afford the desired product **8** (73.8 mg, 85%) as a reddish brown solid. Mp: 164-166 °C.

**<sup>1</sup>H NMR (600 MHz, CDCl<sub>3</sub>)** δ 8.42 (d, *J* = 6.7 Hz, 2H), 8.34 (d, *J* = 7.2 Hz, 4H), 7.71 (d, *J* = 9.0 Hz, 2H), 7.52 (t, *J* = 7.7 Hz, 4H), 7.42 (t, *J* = 7.4 Hz, 2H), 7.38 – 7.33 (m, 2H), 6.98 (td, *J* = 6.8, 1.0 Hz, 2H).

**<sup>13</sup>C NMR (151 MHz, CDCl<sub>3</sub>)** δ 151.4, 145.8, 132.9, 129.2, 128.8, 127.5, 127.4, 125.7, 117.8, 113.6, 104.1, 86.7, 75.7.

**HRMS (ESI)** *m/z*: [M+H]<sup>+</sup> Calcd for C<sub>30</sub>H<sub>18</sub>N<sub>4</sub> 435.1604; Found 435.1603.

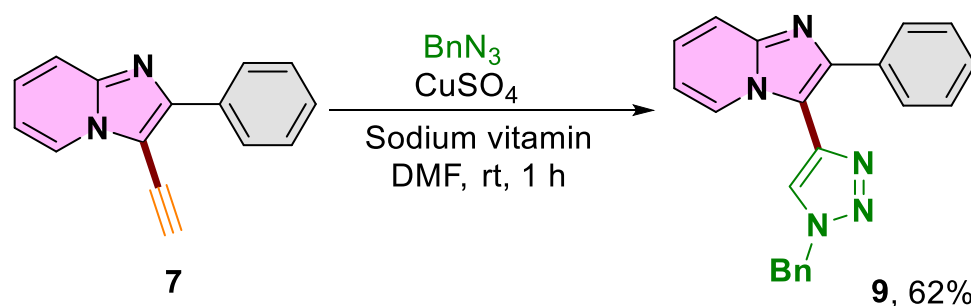

**3-(1-Benzyl-1H-1,2,3-triazol-4-yl)-2-phenylimidazo[1,2-*a*]pyridine (9).** To a 15 mL oven dried Schlenk tube, **7** (43.7 mg, 0.2 mmol), BnN<sub>3</sub> (77.7 mg, 0.4 mmol), CuSO<sub>4</sub> (43.8 mg, 0.4 mmol), sodium vitamin (19.8 mg, 0.1 mmol), and DMF (1.5 mL) were successively added. The reaction mixture was stirred at room temperature for 1 hour under air. After cooling the reaction at room temperature and concentration, the crude mixture was purified by silica column chromatography (petroleum ether/ethyl acetate = 3:1) to afford the white solid **9** (43.5 mg, 62%). Mp: 151-153 °C.

**<sup>1</sup>H NMR (600 MHz, CDCl<sub>3</sub>)** δ 8.99 (d, *J* = 6.9 Hz, 1H), 7.66 (d, *J* = 9.0 Hz, 1H), 7.64 – 7.60 (m, 2H), 7.41 (s, 1H), 7.37 – 7.32 (m, 3H), 7.31 – 7.28 (m, 3H), 7.27 – 7.24 (m, 1H), 7.24 – 7.21 (m, 2H), 6.86 (t, *J* = 6.8 Hz, 1H), 5.53 (s, 2H).

**<sup>13</sup>C NMR (151 MHz, CDCl<sub>3</sub>)** δ 145.5, 144.4, 138.9, 134.5, 134.1, 129.1, 128.8, 128.6, 128.5, 128.2, 127.8, 126.1, 125.6, 122.5, 117.2, 112.8, 111.6, 54.3.

**HRMS (ESI)** *m/z*: [M+H]<sup>+</sup> Calcd for C<sub>22</sub>H<sub>17</sub>N<sub>5</sub> 352.1556; Found 352.1556.

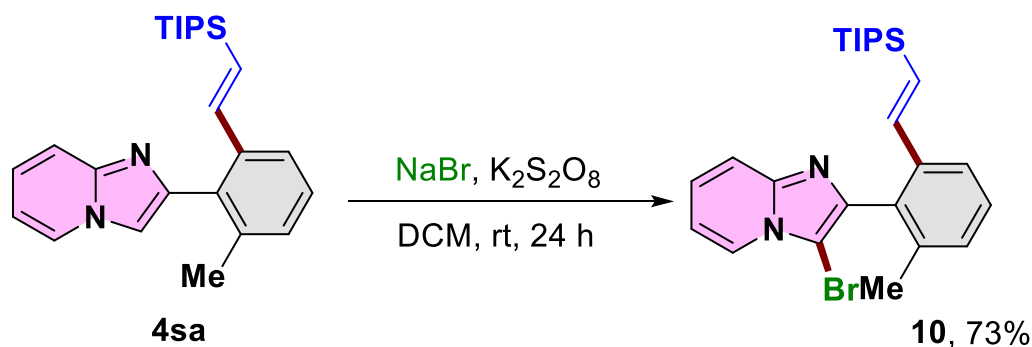

**(*E*)-3-Bromo-2-(2-methyl-6-(2-(triisopropylsilyl)vinyl)phenyl)imidazo[1,2-*a*]pyridine (10).** To a 15 mL oven dried Schlenk tube, **4sa** (78.1 mg, 0.2 mmol), NaBr (41.2 mg, 0.4 mmol), K<sub>2</sub>S<sub>2</sub>O<sub>8</sub>

(108.1 mg, 0.4 mmol), and DCM (1.5 mL) were successively added. The reaction mixture was stirred at room temperature for 24 hours under air. After cooling the reaction at room temperature and concentration, the crude mixture was purified by silica column chromatography (petroleum ether/ethyl acetate = 3:1) to afford the grey solid **10** (68.4 mg, 73%). Mp: 116-118 °C.

**<sup>1</sup>H NMR (600 MHz, CDCl<sub>3</sub>)** δ 8.13 (d, *J* = 6.8 Hz, 1H), 7.64 (d, *J* = 9.0 Hz, 1H), 7.48 (d, *J* = 7.8 Hz, 1H), 7.32 (t, *J* = 7.7 Hz, 1H), 7.28 (d, *J* = 9.1 Hz, 1H), 7.20 (d, *J* = 7.5 Hz, 1H), 6.95 (t, *J* = 6.4 Hz, 1H), 6.58 (d, *J* = 19.4 Hz, 1H), 6.16 (d, *J* = 19.4 Hz, 1H), 2.15 (s, 3H), 0.92 – 0.82 (m, 21H).

**<sup>13</sup>C NMR (151 MHz, CDCl<sub>3</sub>)** δ 145.4, 144.6, 143.1, 139.9, 138.0, 130.6, 129.0, 128.9, 125.9, 124.9, 123.8, 122.9, 117.6, 113.1, 95.1, 18.5, 18.4, 10.9.

**HRMS (ESI)** *m/z*: [M+H]<sup>+</sup> Calcd for C<sub>25</sub>H<sub>33</sub>BrN<sub>2</sub>Si 469.1669; Found 469.1671.

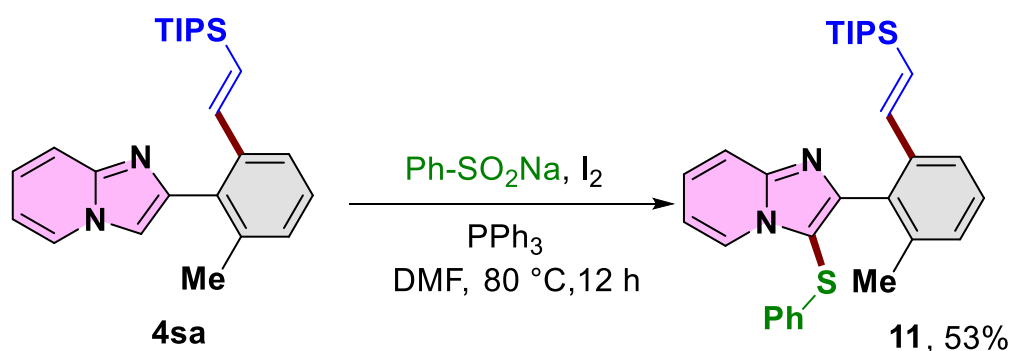

**(E)-2-(2-methyl-6-(2-(triisopropylsilyl)vinyl)phenyl)-3-(phenylthio)imidazo[1,2-*a*]pyridine**

**(11)**. To a 15 mL oven dried Schlenk tube, **4sa** (78.1 mg, 0.2 mmol), Ph-SO<sub>2</sub>Na (65.7 mg, 0.4 mmol), I<sub>2</sub> (50.8 mg, 0.2 mmol), PPh<sub>3</sub> (104.9 mg, 0.4 mmol), and DMF (1.5 mL) were successively added. The reaction mixture was stirred at 80 °C (metal sand bath temperature) for 12 hours under air. After cooling the reaction at room temperature and concentration, the crude mixture was purified by silica column chromatography (petroleum ether/ethyl acetate = 3:1) to afford the grey solid **11** (52.8 mg, 53%). Mp: 152-154 °C.

**<sup>1</sup>H NMR (600 MHz, CDCl<sub>3</sub>)** δ 8.20 (d, *J* = 6.8 Hz, 1H), 7.72 (d, *J* = 8.9 Hz, 1H), 7.49 (d, *J* = 7.8 Hz, 1H), 7.38 – 7.33 (m, 1H), 7.30 (t, *J* = 7.7 Hz, 1H), 7.17 (d, *J* = 7.5 Hz, 1H), 7.13 (t, *J* = 7.4 Hz, 2H), 7.09 (d, *J* = 7.2 Hz, 1H), 6.91 (d, *J* = 7.3 Hz, 3H), 6.63 (d, *J* = 19.4 Hz, 1H), 6.20 (d, *J* = 19.4 Hz, 1H), 2.14 (s, 3H), 0.96 – 0.89 (m, 21H).

**<sup>13</sup>C NMR (151 MHz, CDCl<sub>3</sub>)** δ 151.5, 147.0, 144.8, 139.9, 137.7, 134.8, 131.5, 129.2, 129.0, 128.6, 126.6, 126.2, 126.1, 125.6, 124.4, 122.9, 117.8, 113.1, 110.0, 20.5, 18.5, 10.9.

**HRMS (ESI)** *m/z*: [M+H]<sup>+</sup> Calcd for C<sub>31</sub>H<sub>38</sub>N<sub>2</sub>SSi 499.2597; Found 499.2596.

### 3.7 H/D exchange experiment.

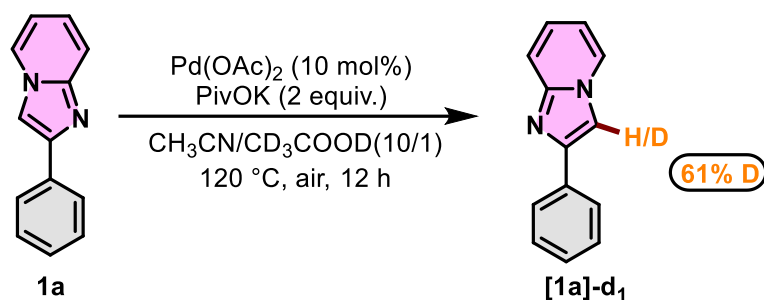

To a 15 mL oven dried Schlenk tube, PivOK (56.9 mg, 0.4 mmol), 2-phenylimidazopyridine **1a** (38.8 mg, 0.2 mmol), Pd(OAc)<sub>2</sub> (4.5 mg, 0.02 mmol, 10 mol%), CD<sub>3</sub>COOD (0.2 mL) and CH<sub>3</sub>CN (2 mL) were charged into a Schlenk tube. The mixture was then stirred at 120 °C under the air for 12 hours. Then, the reaction mixture was cooled to room temperature and filtered through a plug of celite. The organic phase was concentrated under reduced pressure, and the residue was purified by silica gel chromatography (petroleum ether/ethyl acetate = 30:1) to afford [1a]-d<sub>1</sub> as grey solid in 80% isolated yield. Upon analyzing the <sup>1</sup>H NMR spectra as shown in Figure S1, the estimated deuterium incorporation at the C3-position of the 2-phenylimidazopyridine was 61%.

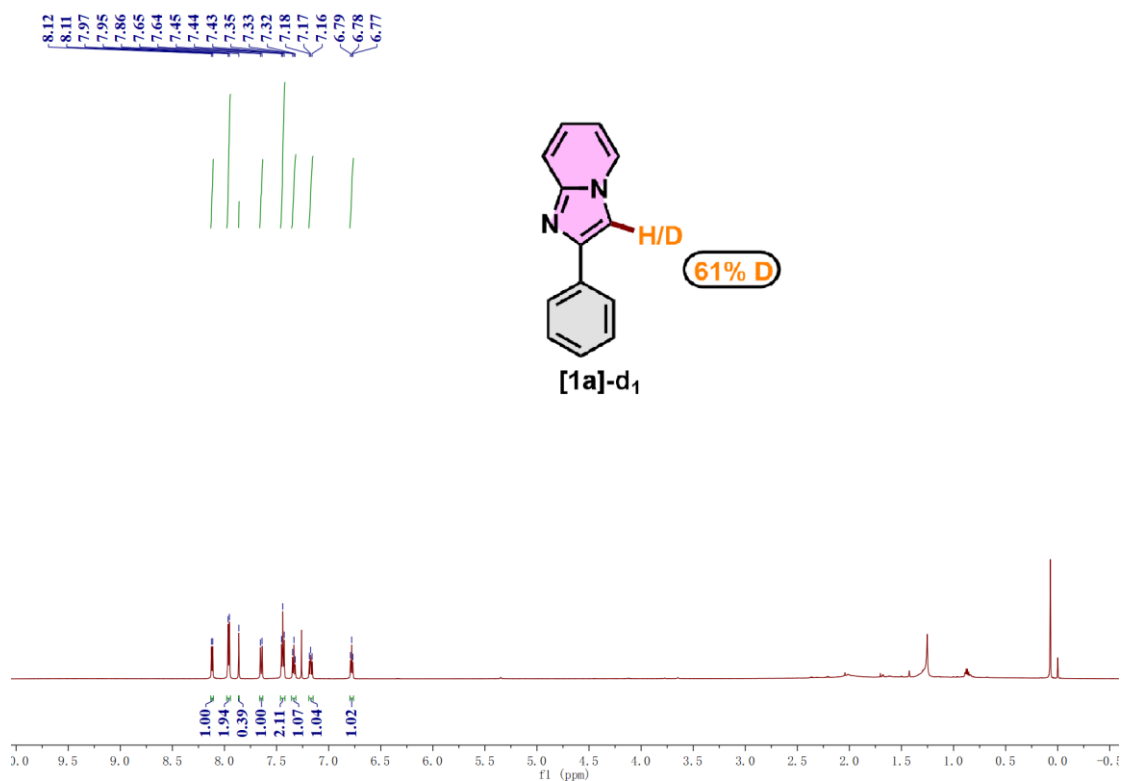

Figure S1. The <sup>1</sup>H NMR spectra of [1a]-d<sub>1</sub>

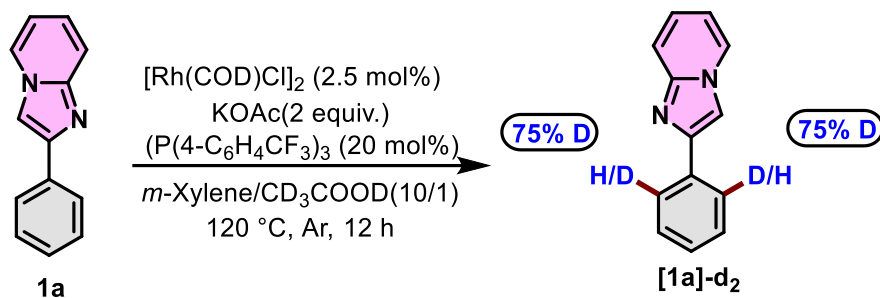

To a 15 mL oven dried Schlenk tube,  $P(4-C_6H_4CF_3)_3$  (18.7 mg, 0.04 mmol, 20 mol%), 2-phenylimidazopyridine **1a** (38.8 mg, 0.2 mmol),  $[Rh(COD)Cl]_2$  (2.5 mg, 0.005 mmol, 2.5 mol%),  $CD_3COOD$  (0.2 mL) and *m*-xylene (2 mL) were charged into a Schlenk tube. The mixture was then stirred at 120 °C under the Ar for 12 hours. Then, the reaction mixture was cooled to room temperature and filtered through a plug of celite. The organic phase was concentrated under reduced pressure, and the residue was purified by silica gel chromatography (petroleum ether/ethyl acetate = 30:1) to afford **[1a]-d<sub>2</sub>** as grey solid in 86% isolated yield. Upon analyzing the  $^1H$  NMR spectra as shown in **Figure S2**, the estimated deuterium incorporation at the *ortho*-position of the 2-phenylimidazopyridine was 75%.

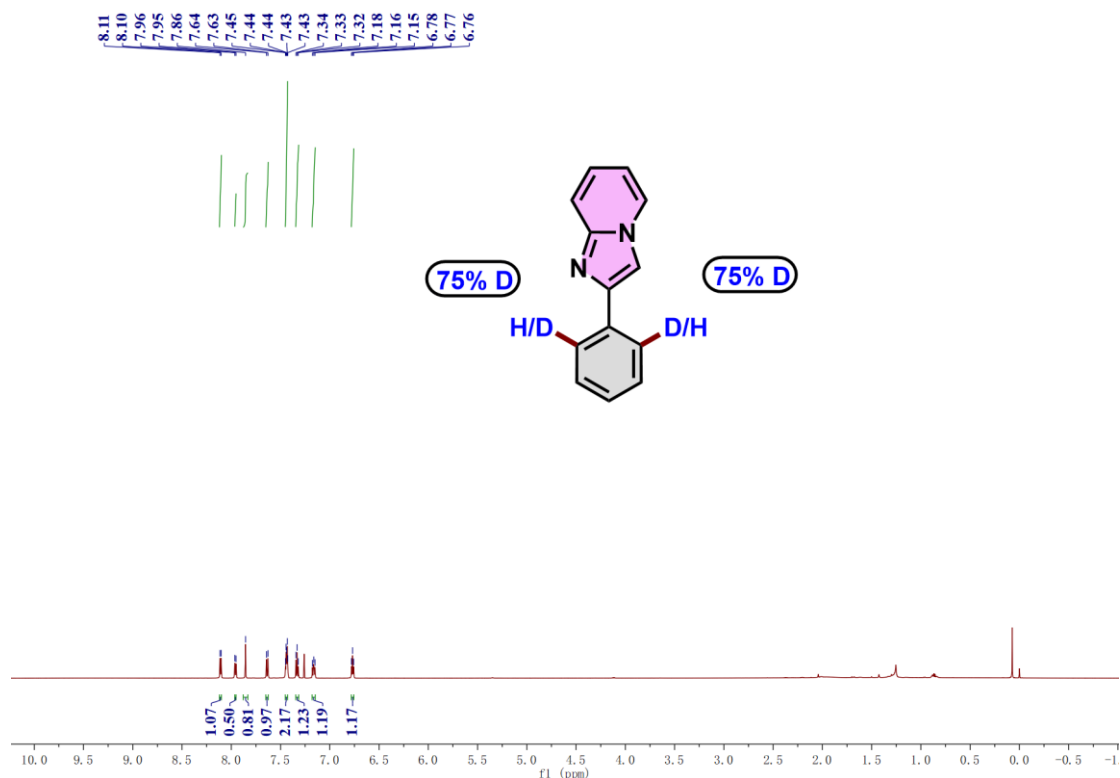

**Figure S2.** The  $^1H$  NMR spectra of **[1a]-d<sub>2</sub>**

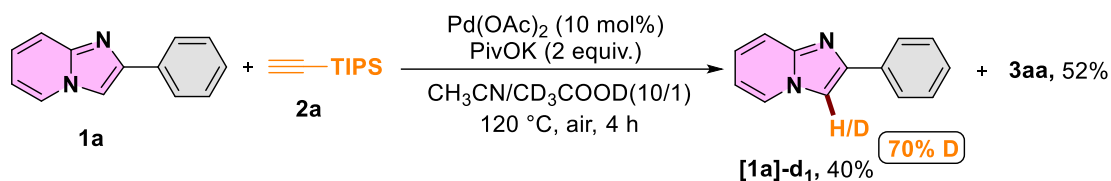

To a 15 mL oven dried Schlenk tube, PivOK (56.9 mg, 0.4 mmol), 2-phenylimidazopyridine **1a** (38.8 mg, 0.2 mmol), TIPS-protected terminal alkyne (54.7 mg, 0.3 mmol), Pd(OAc)<sub>2</sub> (4.5 mg, 0.02 mmol, 10 mol%), CD<sub>3</sub>COOD (0.2 mL) and CH<sub>3</sub>CN (2 mL) were charged into a Schlenk tube. The mixture was then stirred at 120 °C under the air for 4 hours. Then, the reaction mixture was cooled to room temperature and filtered through a plug of celite. The organic phase was concentrated under reduced pressure, and the residue was purified by silica gel chromatography (petroleum ether/ethyl acetate = 30:1) to afford **[1a]-d<sub>1</sub>** as grey solid in 40% isolated yield. Upon analyzing the <sup>1</sup>H NMR spectra as shown in **Figure S3**, the estimated deuterium incorporation at the C3-position of the 2-phenylimidazopyridine was 70%.

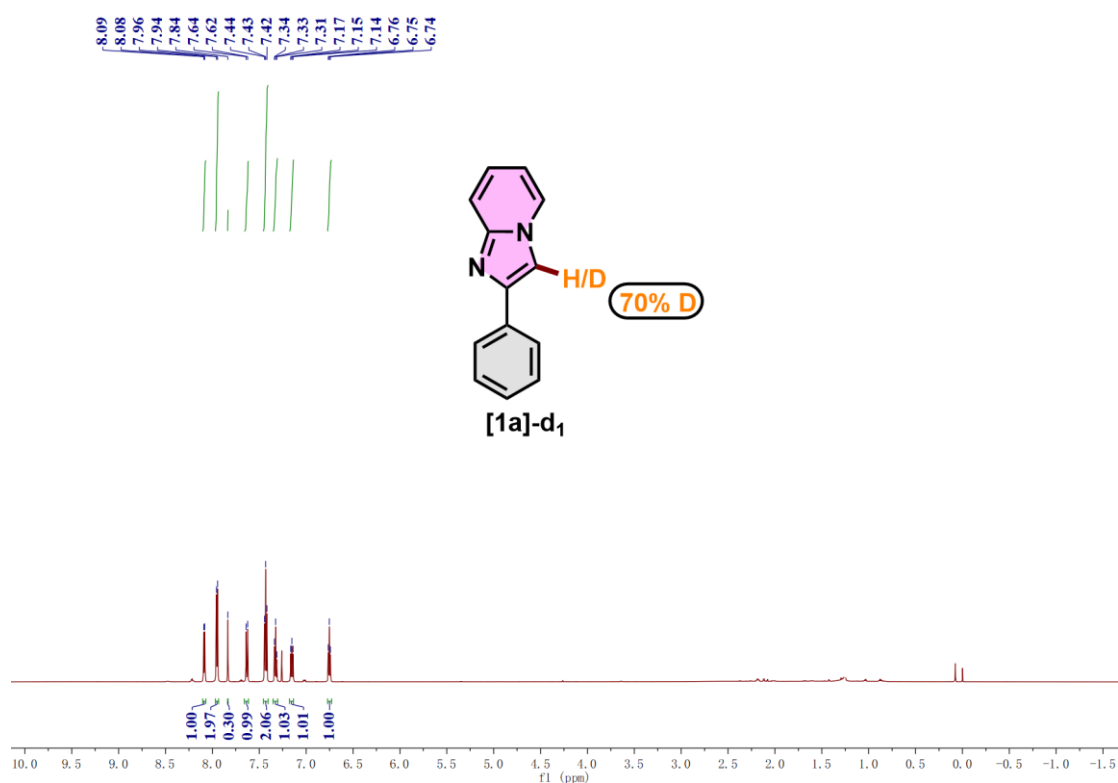

**Figure S3.** The <sup>1</sup>H NMR spectra of **[1a]-d<sub>1</sub>**

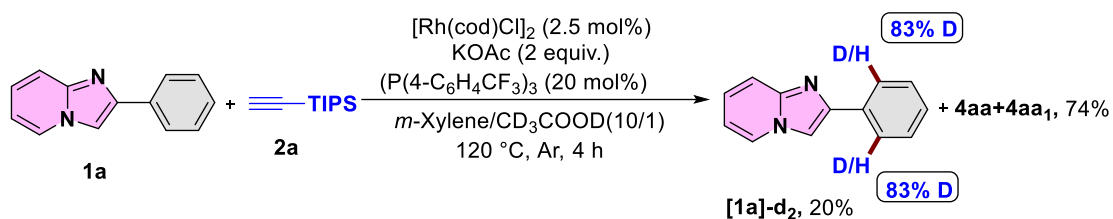

To a 15 mL oven dried Schlenk tube,  $(P(4-C_6H_4CF_3)_3)$  (18.7 mg, 0.04 mmol, 20 mol%), 2-phenylimidazopyridine **1a** (38.8 mg, 0.2 mmol), TIPS-protected terminal alkyne (91.2 mg, 0.5 mmol),  $[Rh(COD)Cl]_2$  (2.5 mg, 0.005 mmol, 2.5 mol%),  $CD_3COOD$  (0.2 mL) and *m*-xylene (2 mL) were charged into a Schlenk tube. The mixture was then stirred at 120 °C under the Ar for 4 hours. Then, the reaction mixture was cooled to room temperature and filtered through a plug of celite. The organic phase was concentrated under reduced pressure, and the residue was purified by silica gel chromatography (petroleum ether/ethyl acetate = 30:1) to afford **[1a]-d<sub>2</sub>** as grey solid in 20% isolated yield. Upon analyzing the  $^1H$  NMR spectra as shown in **Figure S4**, the estimated deuterium incorporation at the *ortho*-position of the 2-phenylimidazopyridine was 83%.

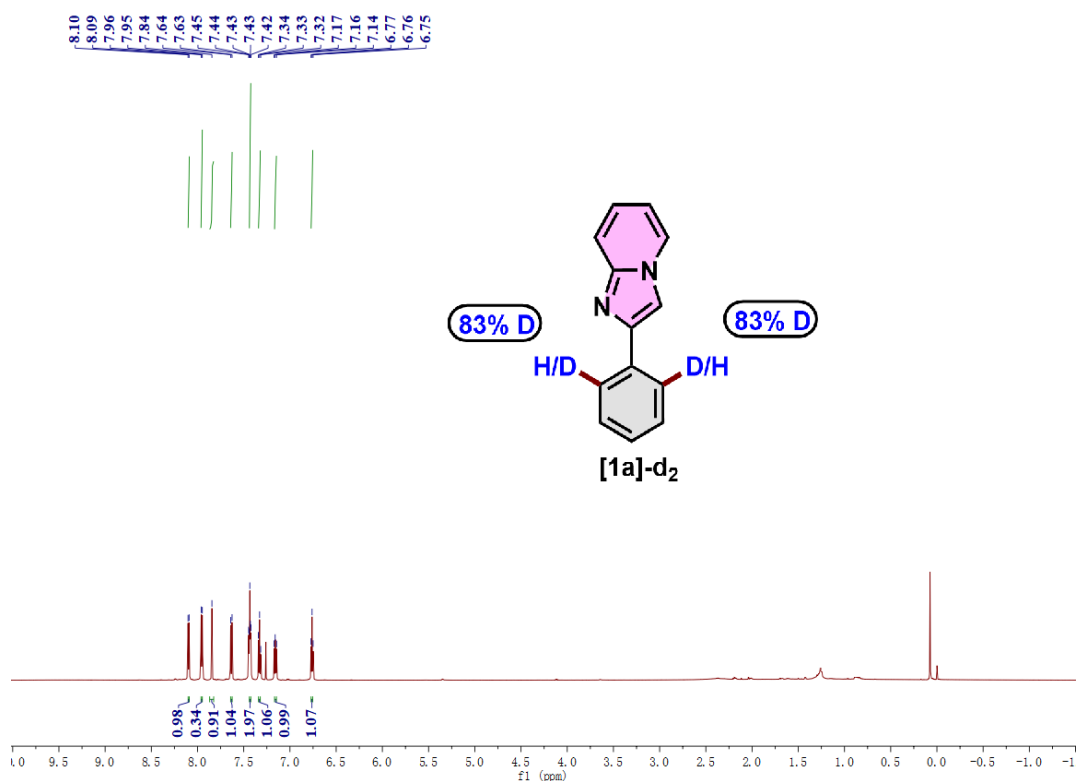

**Figure S4.** The  $^1H$  NMR spectra of **[1a]-d<sub>2</sub>**

### 3.8 KIE determination

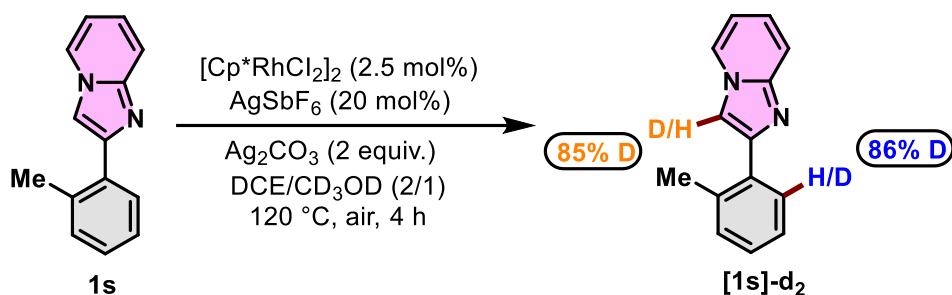

2-(*o*-Tolyl)imidazo[1,2-*a*]pyridine **1s** (62.5 mg, 0.3 mmol), [Cp\*RhCl<sub>2</sub>]<sub>2</sub> (4.6 mg, 0.0075 mmol, 2.5 mol%), Ag<sub>2</sub>CO<sub>3</sub> (165.5 mg, 0.6 mmol), CD<sub>3</sub>OD (0.7 mL) and DCE (1.4 mL) were charged into a Schlenk tube. The mixture was then stirred at 120 °C under air for 4 hours. Then, the reaction mixture was cooled to room temperature and filtered through a plug of celite. The organic phase was concentrated under reduced pressure, and the residue was purified by silica gel chromatography (petroleum ether/ethyl acetate = 3:1) to afford [1s]-d<sub>2</sub> in 87% yield. Upon analyzing the <sup>1</sup>H NMR spectra as shown in **Figure S5**, the estimated deuterium incorporation at the *ortho*-position of the 2-phenyl ring was 86% and at the C3-position of 2-(*o*-tolyl)imidazo[1,2-*a*]pyridine scaffold was 85%.

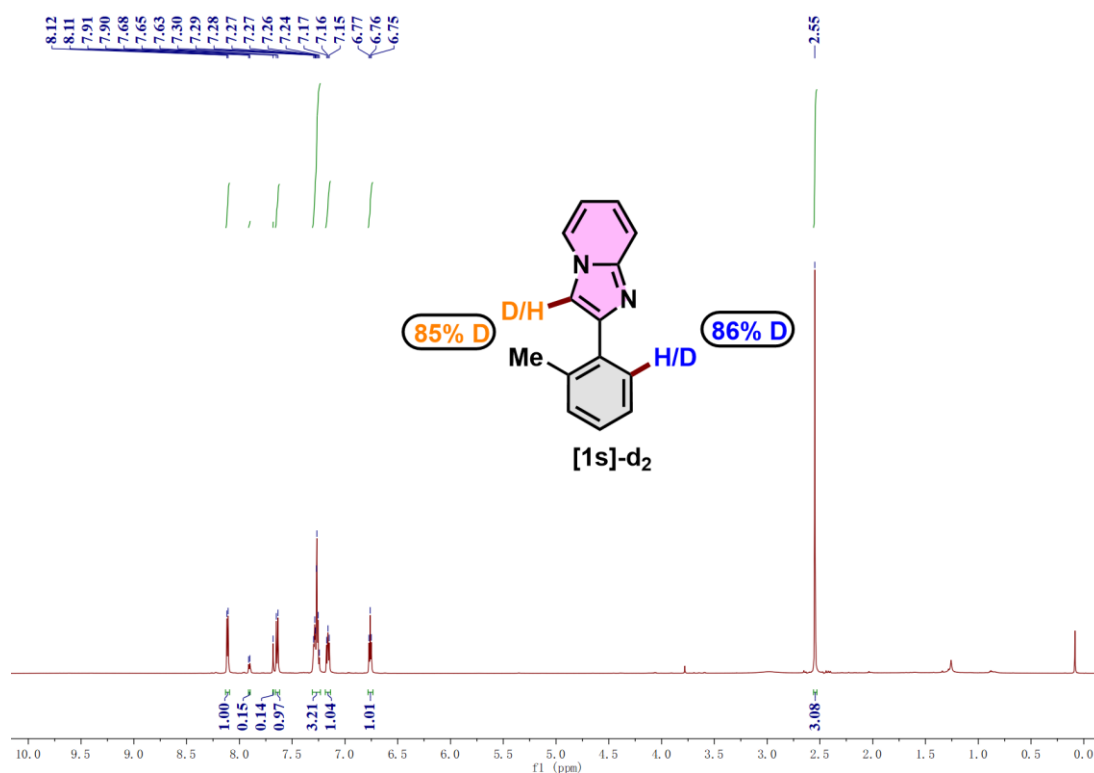

**Figure S5.** The <sup>1</sup>H NMR spectra of [1s]-d<sub>2</sub>

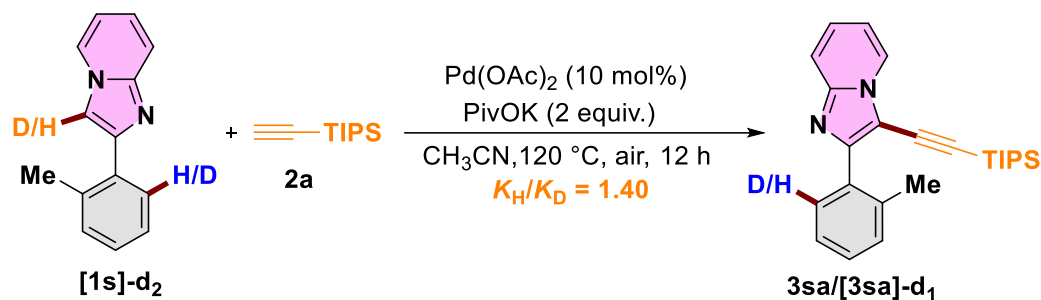

To a 15 mL oven dried Schlenk tube, PivOK (0.6 mmol, 85.3 mg), 2-(*o*-tolyl)imidazo[1,2-*a*]pyridine **1s** (31.3 mg, 0.15 mmol), **[1s]-d<sub>2</sub>** (0.15 mmol, 31.8 mg), Pd(OAc)<sub>2</sub> (6.7 mg, 0.03 mmol, 10 mol%), TIPS-protected terminal alkyne (41.0 mg, 0.225 mmol) and CH<sub>3</sub>CN (2 mL) were successively added. The reaction mixture was stirred at 120 °C (metal sand bath temperature) for 12 hours under air. After cooling the reaction at room temperature and concentration, the crude mixture was purified over a column of silica gel (petroleum ether/ethyl acetate = 30:1) to afford the mixture of products **3sa** and **[3sa]-d<sub>1</sub>** as white solid. By analyzing the <sup>1</sup>H NMR of the mixture **3sa** and **[3sa]-d<sub>1</sub>** as shown in **Figure S6**, the ratio of **3sa** and **[3sa]-d<sub>1</sub>** was determined to be 0.58:0.42. Accordingly, the intermolecular KIE ( $k_H/k_D$ ) = 0.58/1.00-0.58 = 1.40.

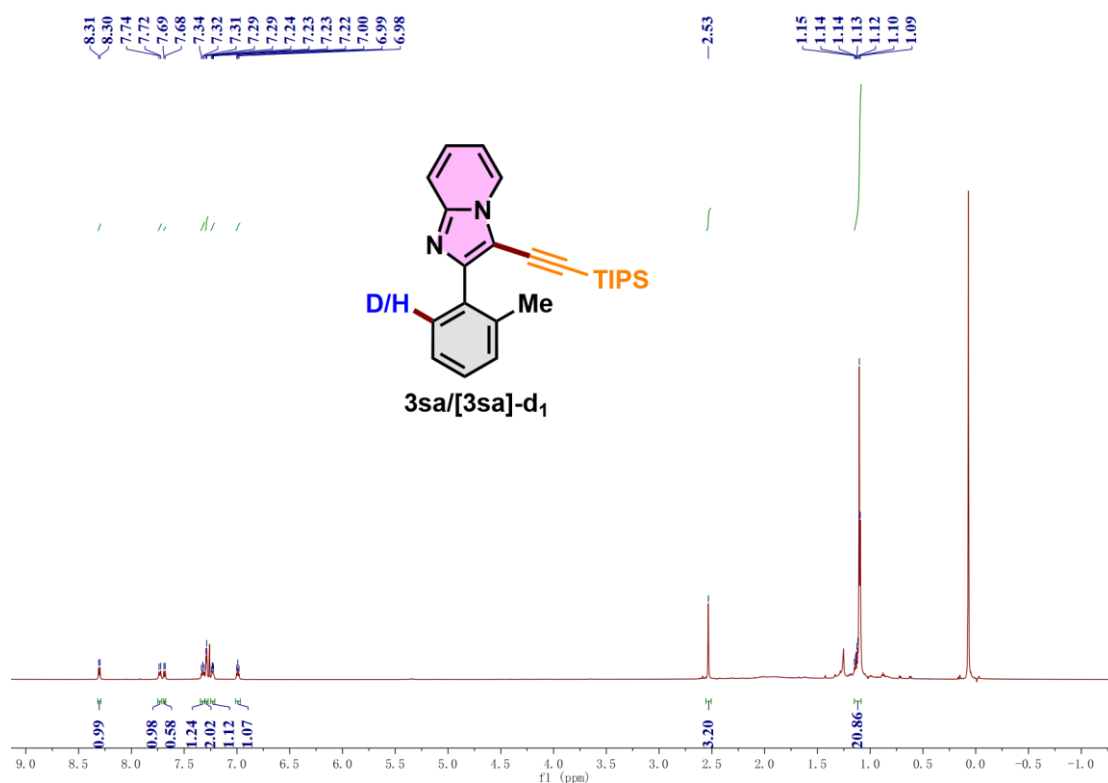

**Figure S6.** The <sup>1</sup>H NMR spectra of **3sa** and **[3sa]-d<sub>1</sub>**

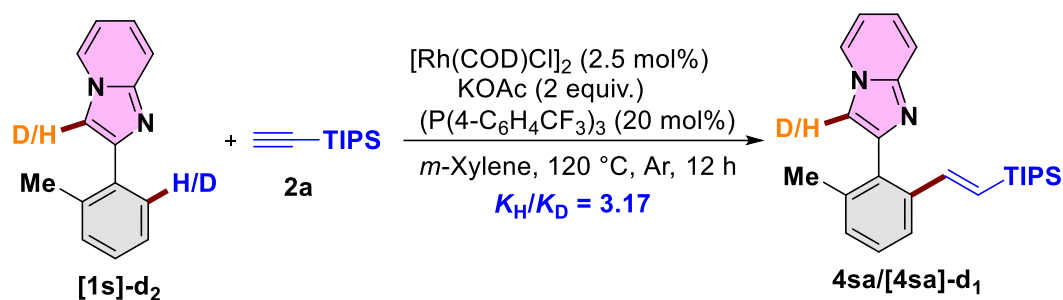

To a 15 mL oven dried Schlenk tube, 2-(*o*-tolyl)imidazo[1,2-*a*]pyridine **1s** (31.3 mg, 0.15 mmol), **[1s]-d<sub>2</sub>** (0.15 mmol, 31.8 mg), P(4-C<sub>6</sub>H<sub>4</sub>CF<sub>3</sub>)<sub>3</sub> (28.0 mg, 0.06 mmol, 20 mol%), and [Rh(COD)Cl]<sub>2</sub> (3.7 mg, 0.0075 mmol, 2.5 mol%), TIPS-protected terminal alkyne (41.0 mg, 0.225 mmol), *m*-xylene (2 mL) were successively added. The reaction mixture was stirred at 120 °C (metal sand bath temperature) for 12 hours under Ar. After cooling the reaction at room temperature and concentration, the crude mixture was purified over a column of silica gel (petroleum ether/ethyl acetate = 30:1) to afford the mixture of products **4sa** and **[4sa]-d<sub>1</sub>** as yellow solid. By analyzing the <sup>1</sup>H NMR of the mixture **4sa** and **[4sa]-d<sub>1</sub>** as shown in **Figure S7**, the ratio of **4sa** and **[4sa]-d<sub>1</sub>** was determined to be 0.76:0.24. Accordingly, the intermolecular KIE ( $k_H/k_D$ ) = 0.76/1.00-0.76= 3.17.

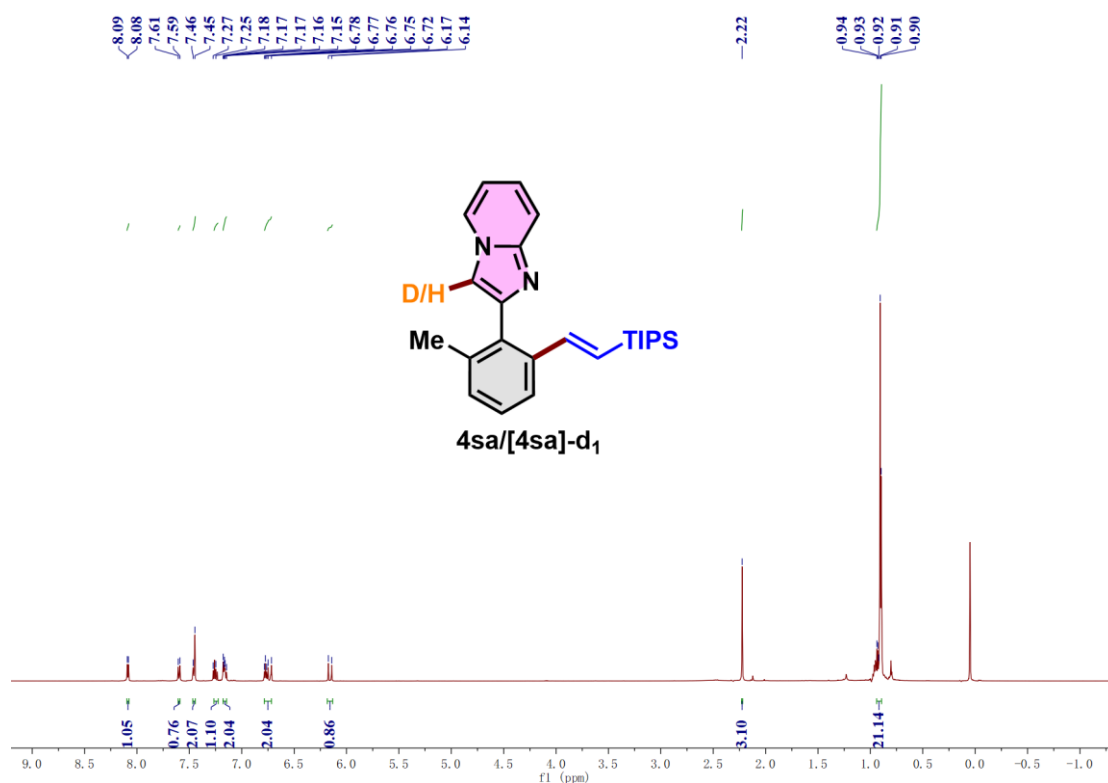

**Figure S7.** The <sup>1</sup>H NMR spectra of **4sa** and **[4sa]-d<sub>1</sub>**

#### 4. Crystallographic description

White block-like single crystals of **3da** were grown by layering a dichloromethane solution with hexane at ambient temperature. X-Ray diffraction data of one these crystals were collected on a R-Axis SPIDER diffractometer. The measurements were performed with Mo-K $\alpha$  radiation ( $\lambda = 0.71073 \text{ \AA}$ ). Data were collected at 298(2) K, using the  $\omega$ - and  $\varphi$ - scans to a maximum  $\theta$  value of 28.327°. The data were refined by full-matrix least-squares techniques on  $F^2$  with SHELXL-2018/3. And the structures were solved by direct methods SHELXL-2018/3. All the non-hydrogen atoms were refined anisotropically. The hydrogen atoms were included at geometrically idealized positions. And an ORTEP representation of the structure is shown below. CCDC: 2522537.

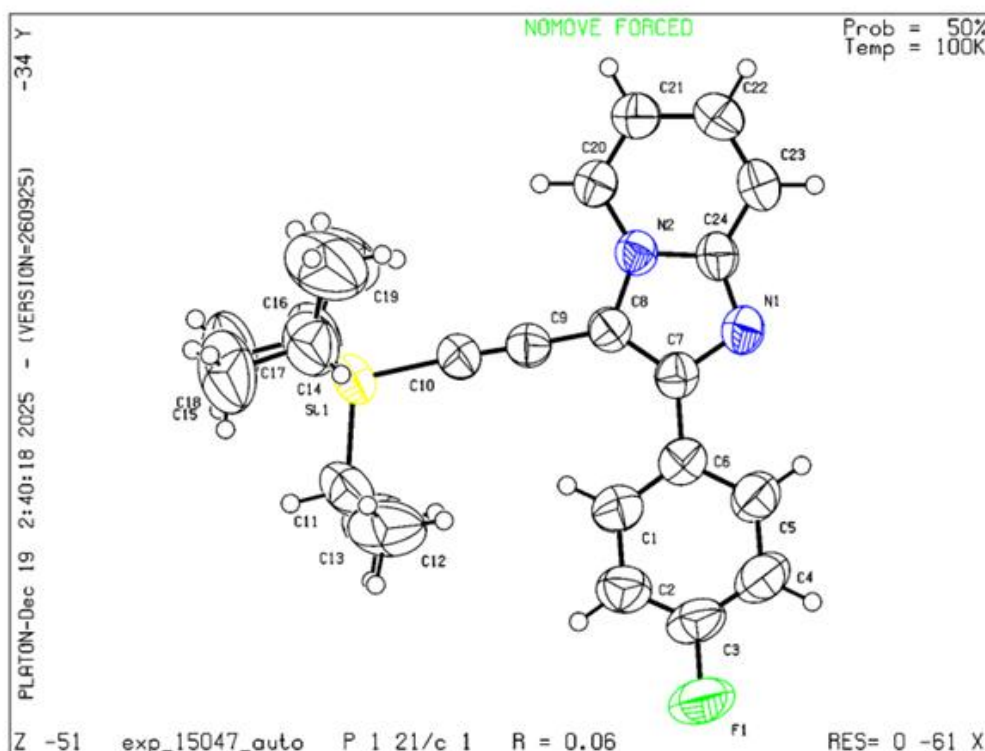

**Figure S8.** ORTEP diagram of **3da** with the thermal ellipsoids set at 50% probability.

**Table 2** Crystal data and structure refinement for **3da**.

|                     |                                                    |
|---------------------|----------------------------------------------------|
| Identification code | exp_15047_auto                                     |
| Empirical formula   | C <sub>24</sub> H <sub>29</sub> FN <sub>2</sub> Si |
| Formula weight      | 392.58                                             |
| Temperature/K       | 100                                                |
| Crystal system      | monoclinic                                         |
| Space group         | P2 <sub>1</sub> /c                                 |
| a/Å                 | 12.7706(8)                                         |
| b/Å                 | 14.9937(10)                                        |
| c/Å                 | 12.2093(8)                                         |
| $\alpha$ /°         | 90                                                 |
| $\beta$ /°          | 96.322(6)                                          |
| $\gamma$ /°         | 90                                                 |

|                                             |                                          |
|---------------------------------------------|------------------------------------------|
| Volume/Å <sup>3</sup>                       | 2323.6(3)                                |
| Z                                           | 4                                        |
| ρ <sub>calc</sub> /cm <sup>3</sup>          | 1.122                                    |
| μ/mm <sup>1</sup>                           | 1.031                                    |
| F(000)                                      | 840.0                                    |
| Crystal size/mm <sup>3</sup>                | 0.12 × 0.1 × 0.09                        |
| Radiation                                   | Cu Kα (λ = 1.54184)                      |
| 2θ range for data collection/°              | 6.964 to 142.16                          |
| Index ranges                                | -15 ≤ h ≤ 15, -17 ≤ k ≤ 10, -14 ≤ l ≤ 11 |
| Reflections collected                       | 8506                                     |
| Independent reflections                     | 4379 [Rint = 0.0272, Rsigma = 0.0396]    |
| Data/restraints/parameters                  | 4379/0/260                               |
| Goodness-of-fit on F <sup>2</sup>           | 1.043                                    |
| Final R indexes [I ≥ 2σ (I)]                | R1 = 0.0649, wR2 = 0.1766                |
| Final R indexes [all data]                  | R1 = 0.0840, wR2 = 0.1970                |
| Largest diff. peak/hole / e Å <sup>-3</sup> | 0.34/-0.27                               |

**Table 3** Fractional Atomic Coordinates (×10<sup>4</sup>) and Equivalent Isotropic Displacement Parameters (Å<sup>2</sup>×10<sup>3</sup>) for **3da**. U<sub>eq</sub> is defined as 1/3 of the trace of the orthogonalised U<sub>ij</sub> tensor.

| Atom | x          | y          | z          | U(eq)     |
|------|------------|------------|------------|-----------|
| Si1  | 1819.6(6)  | 6239.4(6)  | 1690.0(7)  | 71.7(3)   |
| N2   | 5177.1(16) | 6996.3(14) | 4467.1(16) | 57.7(5)   |
| F1   | 2038.8(16) | 3487.7(18) | 7410(2)    | 126.8(9)  |
| N1   | 5428.2(18) | 6303.5(15) | 6107.5(17) | 65.2(6)   |
| C8   | 4333(2)    | 6419.5(17) | 4512(2)    | 58.2(6)   |
| C7   | 4516(2)    | 6007.3(17) | 5534(2)    | 58.3(6)   |
| C6   | 3866(2)    | 5329.8(18) | 6013(2)    | 62.1(6)   |
| C9   | 3531(2)    | 6370.3(18) | 3622(2)    | 62.1(6)   |
| C24  | 5819(2)    | 6900.2(18) | 5449(2)    | 63.1(6)   |
| C20  | 5400(2)    | 7571.4(19) | 3651(2)    | 65.7(7)   |
| C10  | 2856(2)    | 6349(2)    | 2850(2)    | 70.1(7)   |
| C21  | 6284(2)    | 8070(2)    | 3813(2)    | 75.8(8)   |
| C23  | 6747(2)    | 7416(2)    | 5606(2)    | 77.8(8)   |
| C1   | 2969(2)    | 4982(2)    | 5436(3)    | 78.6(8)   |
| C5   | 4153(2)    | 5024(2)    | 7076(3)    | 81.2(9)   |
| C22  | 6971(3)    | 7984(2)    | 4798(3)    | 83.1(9)   |
| C3   | 2654(3)    | 4101(2)    | 6953(3)    | 87.0(10)  |
| C2   | 2352(3)    | 4366(2)    | 5910(3)    | 85.7(9)   |
| C4   | 3542(3)    | 4403(3)    | 7549(3)    | 98.7(11)  |
| C11  | 898(3)     | 5353(3)    | 2112(3)    | 97.2(11)  |
| C14  | 1106(3)    | 7338(3)    | 1539(4)    | 121.7(15) |
| C12  | 433(3)     | 5595(4)    | 3170(5)    | 136.9(18) |
| C17  | 2476(3)    | 5839(4)    | 484(3)     | 128.4(17) |
| C13  | 1399(4)    | 4430(3)    | 2238(5)    | 136.0(17) |
| C15  | 87(4)      | 7306(4)    | 754(5)     | 157(2)    |

|     |         |         |         |        |
|-----|---------|---------|---------|--------|
| C18 | 1718(4) | 5615(5) | -510(4) | 171(3) |
| C19 | 3455(4) | 6216(5) | 290(5)  | 178(3) |
| C16 | 1716(5) | 8117(4) | 1477(6) | 189(3) |

**Table 4 Anisotropic Displacement Parameters ( $\text{\AA}^2 \times 10^3$ ) for 3da. The Anisotropic displacement factor exponent takes the form:  $-2\pi^2[h^2a^*2U_{11}+2hka^*b^*U_{12}+\dots]$ .**

| Atom | $U_{11}$ | $U_{22}$  | $U_{33}$ | $U_{23}$ | $U_{13}$ | $U_{12}$  |
|------|----------|-----------|----------|----------|----------|-----------|
| Si1  | 55.3(4)  | 82.3(6)   | 74.2(5)  | -3.8(4)  | -7.7(3)  | -5.2(4)   |
| N2   | 59.8(12) | 61.7(12)  | 51.5(10) | -3.6(9)  | 5.4(9)   | -1.6(9)   |
| F1   | 81.6(13) | 144.7(19) | 157(2)   | 81.5(17) | 26.1(13) | -4.3(12)  |
| N1   | 70.9(14) | 72.7(14)  | 51.0(11) | -3.0(10) | 2.6(10)  | -1.5(11)  |
| C8   | 55.0(13) | 67.3(15)  | 53.0(13) | -6.0(11) | 9.1(10)  | -1.8(11)  |
| C7   | 61.4(14) | 63.9(14)  | 50.7(12) | -6.4(11) | 10.8(11) | 3.7(11)   |
| C6   | 62.5(15) | 64.7(15)  | 61.5(14) | -1.3(11) | 18.0(12) | 11.2(12)  |
| C9   | 57.1(14) | 69.3(16)  | 60.4(14) | 1.4(12)  | 9.0(12)  | -3.3(11)  |
| C24  | 68.0(16) | 66.9(15)  | 53.1(13) | -8.3(11) | 0.5(12)  | -2.3(12)  |
| C20  | 68.9(16) | 72.6(16)  | 55.2(13) | 1.1(12)  | 5.1(12)  | -2.8(13)  |
| C10  | 58.1(15) | 86.1(19)  | 64.9(16) | 6.0(13)  | 1.4(13)  | -9.3(13)  |
| C21  | 80.2(19) | 77.4(18)  | 69.5(17) | 2.7(14)  | 7.3(15)  | -14.2(15) |
| C23  | 77.2(19) | 87(2)     | 65.7(16) | -6.5(14) | -9.9(14) | -13.9(15) |
| C1   | 77.4(19) | 88(2)     | 72.2(17) | 8.2(15)  | 15.6(15) | -6.2(16)  |
| C5   | 73.1(18) | 98(2)     | 73.5(18) | 18.1(16) | 11.1(15) | 5.0(16)   |
| C22  | 81(2)    | 81(2)     | 85(2)    | -3.9(16) | -0.2(16) | -24.3(16) |
| C3   | 68.4(18) | 93(2)     | 105(2)   | 38.0(19) | 31.6(18) | 11.9(16)  |
| C2   | 69.4(18) | 91(2)     | 98(2)    | 14.8(18) | 17.0(17) | -3.6(16)  |
| C4   | 86(2)    | 119(3)    | 93(2)    | 45(2)    | 18.7(19) | 7(2)      |
| C11  | 63.8(18) | 98(2)     | 126(3)   | -3(2)    | -8.0(19) | -10.5(17) |
| C14  | 111(3)   | 89(3)     | 154(4)   | 16(3)    | -35(3)   | 1(2)      |
| C12  | 83(3)    | 145(4)    | 191(5)   | 26(4)    | 58(3)    | 6(3)      |
| C17  | 92(3)    | 207(5)    | 86(3)    | -32(3)   | 7(2)     | -30(3)    |
| C13  | 148(4)   | 81(3)     | 179(5)   | -1(3)    | 20(4)    | -11(3)    |
| C15  | 122(4)   | 143(4)    | 189(5)   | 10(4)    | -55(4)   | 42(3)     |
| C18  | 143(4)   | 263(8)    | 100(3)   | -63(4)   | -16(3)   | 12(5)     |
| C19  | 145(5)   | 261(8)    | 139(4)   | -56(5)   | 69(4)    | -78(5)    |
| C16  | 155(5)   | 100(4)    | 301(9)   | 36(5)    | -22(6)   | -14(3)    |

**Table 5 Bond Lengths for 3da.**

| Atom | Atom | Length/ $\text{\AA}$ | Atom | Atom | Length/ $\text{\AA}$ |
|------|------|----------------------|------|------|----------------------|
| Si1  | C10  | 1.836(3)             | C9   | C10  | 1.206(4)             |
| Si1  | C11  | 1.884(4)             | C24  | C23  | 1.410(4)             |
| Si1  | C14  | 1.881(4)             | C20  | C21  | 1.351(4)             |
| Si1  | C17  | 1.871(4)             | C21  | C22  | 1.414(4)             |
| N2   | C8   | 1.388(3)             | C23  | C22  | 1.357(4)             |
| N2   | C24  | 1.383(3)             | C1   | C2   | 1.382(4)             |
| N2   | C20  | 1.371(3)             | C5   | C4   | 1.381(5)             |
| F1   | C3   | 1.368(4)             | C3   | C2   | 1.350(5)             |

|    |     |          |     |     |          |
|----|-----|----------|-----|-----|----------|
| N1 | C7  | 1.366(3) | C3  | C4  | 1.356(5) |
| N1 | C24 | 1.336(3) | C11 | C12 | 1.524(6) |
| C8 | C7  | 1.389(3) | C11 | C13 | 1.524(6) |
| C8 | C9  | 1.411(4) | C14 | C15 | 1.530(6) |
| C7 | C6  | 1.473(4) | C14 | C16 | 1.412(6) |
| C6 | C1  | 1.380(4) | C17 | C18 | 1.505(6) |
| C6 | C5  | 1.387(4) | C17 | C19 | 1.416(6) |

**Table 6** Bond Angles for **3da**.

| Atom Atom Atom Angle/° |     |     |            | Atom Atom Atom Angle/° |     |     |          |
|------------------------|-----|-----|------------|------------------------|-----|-----|----------|
| C10                    | Si1 | C11 | 105.73(15) | N1                     | C24 | C23 | 130.6(3) |
| C10                    | Si1 | C14 | 107.32(17) | C21                    | C20 | N2  | 118.6(3) |
| C10                    | Si1 | C17 | 106.75(16) | C9                     | C10 | Si1 | 176.3(3) |
| C14                    | Si1 | C11 | 109.50(19) | C20                    | C21 | C22 | 120.3(3) |
| C17                    | Si1 | C11 | 109.6(2)   | C22                    | C23 | C24 | 119.2(3) |
| C17                    | Si1 | C14 | 117.2(3)   | C6                     | C1  | C2  | 121.2(3) |
| C24                    | N2  | C8  | 106.8(2)   | C4                     | C5  | C6  | 120.7(3) |
| C20                    | N2  | C8  | 130.2(2)   | C23                    | C22 | C21 | 121.0(3) |
| C20                    | N2  | C24 | 123.0(2)   | C2                     | C3  | F1  | 117.7(3) |
| C24                    | N1  | C7  | 105.3(2)   | C2                     | C3  | C4  | 122.9(3) |
| N2                     | C8  | C7  | 105.0(2)   | C4                     | C3  | F1  | 119.3(3) |
| N2                     | C8  | C9  | 120.2(2)   | C3                     | C2  | C1  | 118.4(3) |
| C7                     | C8  | C9  | 134.8(2)   | C3                     | C4  | C5  | 118.6(3) |
| N1                     | C7  | C8  | 111.4(2)   | C12                    | C11 | Si1 | 112.2(3) |
| N1                     | C7  | C6  | 120.5(2)   | C12                    | C11 | C13 | 109.2(4) |
| C8                     | C7  | C6  | 128.1(2)   | C13                    | C11 | Si1 | 113.6(3) |
| C1                     | C6  | C7  | 122.0(2)   | C15                    | C14 | Si1 | 113.8(3) |
| C1                     | C6  | C5  | 118.2(3)   | C16                    | C14 | Si1 | 117.8(4) |
| C5                     | C6  | C7  | 119.8(3)   | C16                    | C14 | C15 | 115.4(4) |
| C10                    | C9  | C8  | 178.2(3)   | C18                    | C17 | Si1 | 113.7(3) |
| N2                     | C24 | C23 | 118.0(2)   | C19                    | C17 | Si1 | 119.0(4) |
| N1                     | C24 | N2  | 111.5(2)   | C19                    | C17 | C18 | 117.1(4) |

**Table 7** Torsion Angles for **3da**.

| A  | B   | C   | D   | Angle/°   | A   | B   | C   | D   | Angle/°   |
|----|-----|-----|-----|-----------|-----|-----|-----|-----|-----------|
| N2 | C8  | C7  | N1  | -0.2(3)   | C20 | N2  | C8  | C7  | -179.7(2) |
| N2 | C8  | C7  | C6  | -179.9(2) | C20 | N2  | C8  | C9  | -0.4(4)   |
| N2 | C24 | C23 | C22 | 0.3(4)    | C20 | N2  | C24 | N1  | 179.7(2)  |
| N2 | C20 | C21 | C22 | 1.0(4)    | C20 | N2  | C24 | C23 | -0.4(4)   |
| F1 | C3  | C2  | C1  | -179.6(3) | C20 | C21 | C22 | C23 | -1.2(5)   |
| F1 | C3  | C4  | C5  | -179.9(3) | C10 | Si1 | C11 | C12 | 58.8(3)   |
| N1 | C7  | C6  | C1  | -176.6(2) | C10 | Si1 | C11 | C13 | -65.6(3)  |
| N1 | C7  | C6  | C5  | 3.3(4)    | C10 | Si1 | C14 | C15 | -168.9(4) |
| N1 | C24 | C23 | C22 | -179.9(3) | C10 | Si1 | C14 | C16 | 51.5(5)   |
| C8 | N2  | C24 | N1  | -0.3(3)   | C10 | Si1 | C17 | C18 | 173.6(4)  |
| C8 | N2  | C24 | C23 | 179.5(2)  | C10 | Si1 | C17 | C19 | -42.1(6)  |

|                         |                           |
|-------------------------|---------------------------|
| C8 N2 C20 C21 179.8(3)  | C1 C6 C5 C4 -1.5(5)       |
| C8 C7 C6 C1 3.1(4)      | C5 C6 C1 C2 2.0(4)        |
| C8 C7 C6 C5 -177.0(3)   | C2 C3 C4 C5 1.3(6)        |
| C7 N1 C24 N2 0.2(3)     | C4 C3 C2 C1 -0.9(6)       |
| C7 N1 C24 C23 -179.6(3) | C11 Si1 C14 C15 -54.6(5)  |
| C7 C6 C1 C2 -178.1(3)   | C11 Si1 C14 C16 165.8(5)  |
| C7 C6 C5 C4 178.5(3)    | C11 Si1 C17 C18 59.5(5)   |
| C6 C1 C2 C3 -0.9(5)     | C11 Si1 C17 C19 -156.2(5) |
| C6 C5 C4 C3 -0.1(5)     | C14 Si1 C11 C12 -56.5(3)  |
| C9 C8 C7 N1 -179.3(3)   | C14 Si1 C11 C13 179.0(3)  |
| C9 C8 C7 C6 0.9(5)      | C14 Si1 C17 C18 -66.1(5)  |
| C24 N2 C8 C7 0.3(3)     | C14 Si1 C17 C19 78.2(6)   |
| C24 N2 C8 C9 179.6(2)   | C17 Si1 C11 C12 173.5(3)  |
| C24 N2 C20 C21 -0.2(4)  | C17 Si1 C11 C13 49.1(4)   |
| C24 N1 C7 C8 0.0(3)     | C17 Si1 C14 C15 71.1(5)   |
| C24 N1 C7 C6 179.7(2)   | C17 Si1 C14 C16 -68.6(5)  |
| C24 C23 C22 C21 0.6(5)  |                           |

**Table 8** Hydrogen Atom Coordinates ( $\text{\AA} \times 10^4$ ) and Isotropic Displacement Parameters ( $\text{\AA}^2 \times 10^3$ ) for **3da**.

| Atom | x       | y       | z       | U(eq) |
|------|---------|---------|---------|-------|
| H20  | 4941.33 | 7618.43 | 2985.74 | 79    |
| H21  | 6446.36 | 8479.7  | 3262.23 | 91    |
| H23  | 7208.99 | 7366.95 | 6267.77 | 93    |
| H1   | 2771.57 | 5169.48 | 4698.31 | 94    |
| H5   | 4777.36 | 5242.71 | 7482.18 | 97    |
| H22  | 7597.66 | 8329.93 | 4896.64 | 100   |
| H2   | 1729.67 | 4135.46 | 5511.54 | 103   |
| H4   | 3739.12 | 4192.89 | 8276.4  | 118   |
| H11  | 299.02  | 5311.02 | 1513.76 | 117   |
| H14  | 835.88  | 7404.95 | 2273.09 | 146   |
| H12A | 988.96  | 5582.58 | 3790.2  | 205   |
| H12B | -116.8  | 5163.6  | 3299.76 | 205   |
| H12C | 126.45  | 6194.24 | 3099.42 | 205   |
| H17  | 2702.35 | 5228.82 | 740.71  | 154   |
| H13A | 1669.94 | 4260.23 | 1547.14 | 204   |
| H13B | 868.82  | 3995.79 | 2413.5  | 204   |
| H13C | 1979.22 | 4441.78 | 2833.76 | 204   |
| H15A | 253.41  | 7177.38 | 5.41    | 235   |
| H15B | -273.22 | 7882.54 | 762.31  | 235   |
| H15C | -373.04 | 6836.69 | 991.02  | 235   |
| H18A | 1060.71 | 5387.12 | -271.48 | 256   |
| H18B | 2030.16 | 5160    | -950.08 | 256   |
| H18C | 1569.51 | 6152.85 | -957.2  | 256   |
| H19A | 3358.5  | 6848.46 | 103.8   | 266   |
| H19B | 3729.57 | 5902.63 | -322.61 | 266   |

|              |         |         |     |
|--------------|---------|---------|-----|
| H19C 3955.98 | 6157.06 | 954.48  | 266 |
| H16A 2313.91 | 8102.31 | 2052.88 | 283 |
| H16B 1280.39 | 8642.2  | 1581.68 | 283 |
| H16C 1976.74 | 8149.09 | 752.34  | 283 |

White block-like single crystals of **4da** were grown by layering a dichloromethane solution with hexane at ambient temperature. X-Ray diffraction data of one these crystals were collected on a R-Axis SPIDER diffractometer. The measurements were performed with Mo-K $\alpha$  radiation ( $\lambda = 0.71073 \text{ \AA}$ ). Data were collected at 298(2) K, using the  $\omega$ - and  $\varphi$ - scans to a maximum  $\theta$  value of 28.327°. The data were refined by full-matrix least-squares techniques on  $F^2$  with SHELXL-2018/3. And the structures were solved by direct methods SHELXL-2018/3. All the non-hydrogen atoms were refined anisotropically. The hydrogen atoms were included at geometrically idealized positions. And an ORTEP representation of the structure is shown below. CCDC: 2528406.

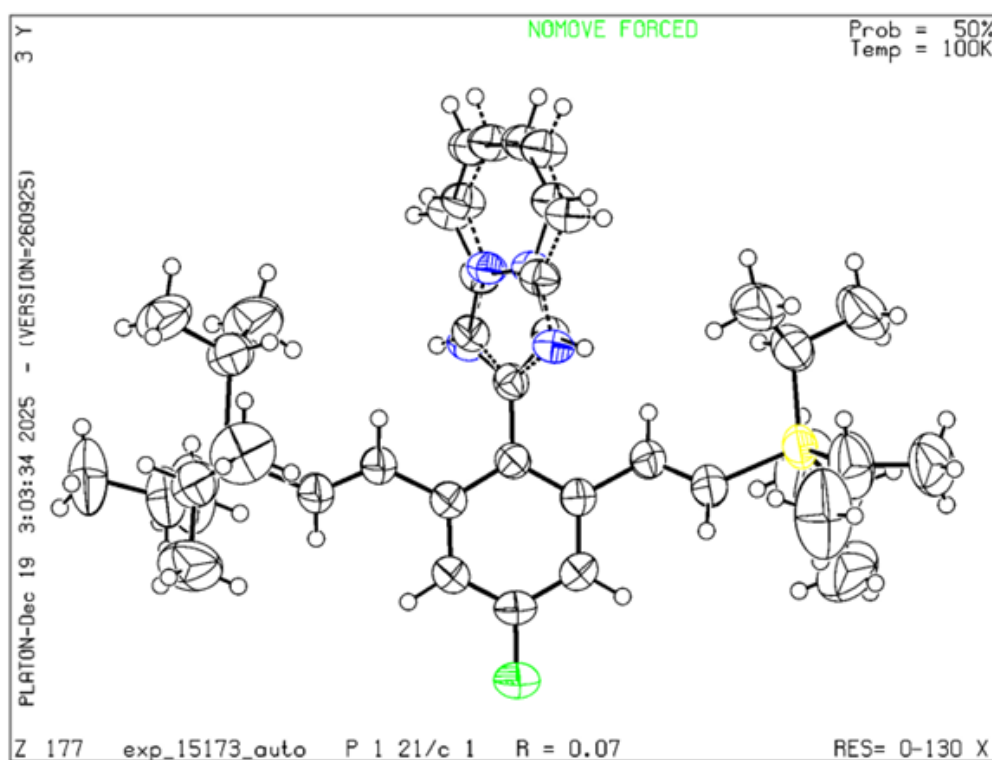

**Figure S9.** ORTEP diagram of **4da** with the thermal ellipsoids set at 50% probability.

**Table 9** Crystal data and structure refinement for **4da**.

|                     |                                                                 |
|---------------------|-----------------------------------------------------------------|
| Identification code | exp_15173_auto                                                  |
| Empirical formula   | C <sub>35</sub> H <sub>53</sub> FN <sub>2</sub> Si <sub>2</sub> |
| Formula weight      | 576.97                                                          |
| Temperature/K       | 100                                                             |
| Crystal system      | monoclinic                                                      |
| Space group         | P21/c                                                           |
| a/Å                 | 18.0162(10)                                                     |
| b/Å                 | 14.2172(11)                                                     |

|                                             |                                          |
|---------------------------------------------|------------------------------------------|
| c/Å                                         | 14.0720(11)                              |
| α/°                                         | 90                                       |
| β/°                                         | 92.780(6)                                |
| γ/°                                         | 90                                       |
| Volume/Å <sup>3</sup>                       | 3600.2(4)                                |
| Z                                           | 4                                        |
| ρ <sub>calc</sub> /cm <sup>3</sup>          | 1.064                                    |
| μ/mm <sup>1</sup>                           | 1.107                                    |
| F(000)                                      | 1256.0                                   |
| Crystal size/mm <sup>3</sup>                | 0.13 × 0.1 × 0.07                        |
| Radiation                                   | Cu Kα (λ = 1.54184)                      |
| 2θ range for data collection/°              | 4.91 to 141.908                          |
| Index ranges                                | -21 ≤ h ≤ 22, -17 ≤ k ≤ 17, -17 ≤ l ≤ 11 |
| Reflections collected                       | 23967                                    |
| Independent reflections                     | 6843 [Rint = 0.0613, Rsigma = 0.0543]    |
| Data/restraints/parameters                  | 6843/433/447                             |
| Goodness-of-fit on F <sup>2</sup>           | 1.050                                    |
| Final R indexes [I ≥ 2σ (I)]                | R1 = 0.0651, wR2 = 0.1702                |
| Final R indexes [all data]                  | R1 = 0.0893, wR2 = 0.1944                |
| Largest diff. peak/hole / e Å <sup>-3</sup> | 0.31/-0.32                               |

**Table 10** Fractional Atomic Coordinates ( $\times 10^4$ ) and Equivalent Isotropic Displacement Parameters ( $\text{\AA}^2 \times 10^3$ ) for **4da**.  $U_{eq}$  is defined as 1/3 of the trace of the orthogonalised  $U_{ij}$  tensor.

| Atom | x          | y          | z          | U(eq)    |
|------|------------|------------|------------|----------|
| Si1  | 7147.1(4)  | 5359.4(6)  | 2885.6(5)  | 57.4(2)  |
| Si2  | 1165.1(4)  | 5410.0(6)  | 2456.0(6)  | 61.9(3)  |
| F1   | 4142.6(11) | 3137.4(18) | 596.3(17)  | 121.1(9) |
| C7   | 4559(13)   | 5906(13)   | 4317(14)   | 49(2)    |
| N2   | 4385(10)   | 6668(9)    | 4784(13)   | 48.0(17) |
| N1   | 3725(11)   | 6674(13)   | 3344(10)   | 49.5(19) |
| C5   | 3852(12)   | 7131(17)   | 4169(12)   | 52.4(18) |
| C6   | 4159.3(12) | 5898.1(17) | 3435.9(17) | 46.3(5)  |
| C9   | 3477.3(13) | 4817.1(18) | 2288.2(18) | 50.1(6)  |
| C8   | 4152.9(12) | 5186.2(17) | 2668.9(16) | 46.6(5)  |
| C25  | 2745.4(13) | 5131.5(18) | 2612.9(18) | 53.1(6)  |
| C13  | 4829.3(14) | 4871.6(18) | 2314.1(18) | 53.1(6)  |
| C14  | 5554.7(14) | 5266.4(19) | 2643.9(18) | 55.4(6)  |
| C15  | 6210.7(14) | 4873(2)    | 2557(2)    | 63.8(7)  |
| C10  | 3481.2(15) | 4121(2)    | 1591(2)    | 66.4(8)  |
| C1   | 3561(7)    | 7976(10)   | 4508(8)    | 57.6(19) |
| C26  | 2118.5(15) | 5143(2)    | 2082(2)    | 68.9(8)  |
| C12  | 4813.9(16) | 4175(2)    | 1609(2)    | 73.2(9)  |
| C4   | 4616(7)    | 7012(8)    | 5680(10)   | 60(2)    |
| C11  | 4147.8(17) | 3825(2)    | 1270(2)    | 77.1(9)  |
| C27  | 1224.0(18) | 6091(2)    | 3604(2)    | 77.8(9)  |

|     |            |          |          |           |
|-----|------------|----------|----------|-----------|
| C16 | 7497(2)    | 6014(3)  | 1836(2)  | 80.8(9)   |
| C22 | 7077.7(19) | 6216(2)  | 3897(2)  | 76.0(9)   |
| C3  | 4323(7)    | 7829(8)  | 5965(9)  | 66(2)     |
| C2  | 3794(7)    | 8317(9)  | 5391(8)  | 65(2)     |
| C19 | 7752.2(18) | 4293(3)  | 3122(3)  | 93.7(11)  |
| C30 | 696(2)     | 4255(3)  | 2663(3)  | 97.9(12)  |
| C24 | 7774(2)    | 6810(3)  | 4085(3)  | 110.4(15) |
| C29 | 1588(2)    | 7057(3)  | 3517(3)  | 113.6(15) |
| C23 | 6819(2)    | 5780(3)  | 4814(2)  | 115.9(16) |
| C34 | -181(2)    | 6045(4)  | 1474(3)  | 117.5(15) |
| C18 | 7561(3)    | 5400(4)  | 953(3)   | 124.5(17) |
| C28 | 475(2)     | 6176(3)  | 4083(3)  | 111.8(14) |
| C17 | 7011(3)    | 6884(3)  | 1588(3)  | 120.2(16) |
| C33 | 660(2)     | 6114(4)  | 1476(3)  | 117.2(16) |
| C21 | 8561(2)    | 4506(3)  | 3362(4)  | 131.3(18) |
| C20 | 7463(2)    | 3573(3)  | 3775(4)  | 135.6(19) |
| C32 | 671(3)     | 3641(4)  | 1756(5)  | 167(3)    |
| C31 | 1068(3)    | 3730(3)  | 3519(4)  | 151(2)    |
| C35 | 973(3)     | 6189(5)  | 591(4)   | 178(3)    |
| C0  | 3756(13)   | 6740(15) | 3500(12) | 47(2)     |
| N0  | 3934(9)    | 7148(13) | 4328(8)  | 48.6(16)  |
| N3  | 4598(11)   | 5779(11) | 4230(12) | 49.4(19)  |
| C36 | 4459(12)   | 6529(12) | 4773(17) | 50.2(18)  |
| C37 | 4757(7)    | 6790(8)  | 5677(10) | 59.4(19)  |
| C38 | 3706(7)    | 7981(10) | 4758(8)  | 59.2(19)  |
| C39 | 3997(6)    | 8200(8)  | 5618(7)  | 62(2)     |
| C40 | 4527(6)    | 7619(8)  | 6086(9)  | 66(2)     |

**Table 11** Anisotropic Displacement Parameters ( $\text{\AA}^2 \times 10^3$ ) for **4da**. The Anisotropic displacement factor exponent takes the form:  $-2\pi^2[h^2a^{*2}U_{11}+2hka^*b^*U_{12}+\dots]$ .

| Atom | $U_{11}$ | $U_{22}$  | $U_{33}$ | $U_{23}$  | $U_{13}$ | $U_{12}$ |
|------|----------|-----------|----------|-----------|----------|----------|
| Si1  | 44.5(4)  | 62.8(5)   | 65.4(5)  | 0.2(3)    | 8.7(3)   | -6.6(3)  |
| Si2  | 43.7(4)  | 68.3(5)   | 74.0(5)  | -0.7(4)   | 4.9(3)   | 3.9(3)   |
| F1   | 77.6(13) | 136.6(19) | 150(2)   | -98.0(17) | 9.8(12)  | -5.7(12) |
| C7   | 50(3)    | 48(5)     | 49(4)    | 0(3)      | 5(3)     | 5(3)     |
| N2   | 56(4)    | 41(3)     | 48(2)    | -8(3)     | 13(3)    | -5(3)    |
| N1   | 61(3)    | 47(3)     | 42(4)    | -4(3)     | 7(3)     | 1(3)     |
| C5   | 60(4)    | 48(3)     | 49(4)    | 0(3)      | 10(3)    | -3(3)    |
| C6   | 44.2(11) | 45.9(12)  | 49.1(13) | 1.7(10)   | 6.9(10)  | -1.1(10) |
| C9   | 46.3(12) | 52.5(14)  | 51.8(14) | -2.0(11)  | 4.3(10)  | -2.0(11) |
| C8   | 46.1(12) | 45.8(13)  | 48.2(13) | -1.0(10)  | 4.4(10)  | 0.1(10)  |
| C25  | 46.5(13) | 59.4(15)  | 53.7(15) | -1.6(12)  | 6.0(11)  | -2.5(11) |
| C13  | 48.4(13) | 52.5(14)  | 58.5(15) | -6.9(11)  | 3.6(11)  | 0.4(11)  |
| C14  | 46.7(13) | 57.1(15)  | 62.7(16) | -9.1(12)  | 6.6(11)  | -3.3(11) |
| C15  | 48.0(14) | 63.6(17)  | 80(2)    | -14.3(14) | 8.2(13)  | -3.6(12) |
| C10  | 53.1(15) | 69.6(18)  | 76.3(19) | -22.0(15) | -0.8(13) | -6.5(13) |

|     |          |        |          |           |          |           |
|-----|----------|--------|----------|-----------|----------|-----------|
| C1  | 72(4)    | 50(3)  | 51(4)    | -6(3)     | 7(3)     | 0(3)      |
| C26 | 48.3(14) | 93(2)  | 65.6(18) | -11.4(15) | 3.2(13)  | 4.1(14)   |
| C12 | 50.8(15) | 80(2)  | 89(2)    | -34.7(17) | 8.1(14)  | 2.7(14)   |
| C4  | 71(4)    | 54(4)  | 56(3)    | -7(3)     | 5(3)     | 9(3)      |
| C11 | 65.3(18) | 80(2)  | 86(2)    | -42.2(18) | 4.7(15)  | -3.1(16)  |
| C27 | 67.5(19) | 80(2)  | 87(2)    | -4.3(17)  | 15.3(16) | 9.0(16)   |
| C16 | 81(2)    | 92(2)  | 70(2)    | -0.6(17)  | 14.4(16) | -20.4(19) |
| C22 | 78(2)    | 84(2)  | 67.6(18) | -7.6(16)  | 11.8(15) | -17.7(17) |
| C3  | 80(5)    | 59(4)  | 58(4)    | -11(3)    | 2(4)     | 9(3)      |
| C2  | 79(5)    | 59(3)  | 58(4)    | -7(3)     | 3(4)     | 8(3)      |
| C19 | 56.7(18) | 86(2)  | 139(3)   | 21(2)     | 10.6(19) | 3.6(17)   |
| C30 | 62(2)    | 80(2)  | 151(4)   | -1(2)     | -1(2)    | -9.6(17)  |
| C24 | 111(3)   | 122(3) | 99(3)    | -33(2)    | 13(2)    | -52(3)    |
| C29 | 110(3)   | 90(3)  | 144(4)   | -39(3)    | 26(3)    | -12(2)    |
| C23 | 130(4)   | 151(4) | 69(2)    | -10(2)    | 27(2)    | -45(3)    |
| C34 | 80(3)    | 143(4) | 128(3)   | 13(3)     | -14(2)   | 39(3)     |
| C18 | 151(4)   | 146(4) | 79(3)    | -14(3)    | 40(3)    | -16(3)    |
| C28 | 98(3)    | 137(4) | 103(3)   | -8(3)     | 38(2)    | 19(3)     |
| C17 | 157(4)   | 106(3) | 98(3)    | 37(3)     | 6(3)     | -13(3)    |
| C33 | 78(2)    | 173(5) | 101(3)   | 35(3)     | 2(2)     | 22(3)     |
| C21 | 55(2)    | 127(4) | 211(5)   | 42(4)     | -3(3)    | 8(2)      |
| C20 | 86(3)    | 107(3) | 214(5)   | 65(4)     | 8(3)     | 5(2)      |
| C32 | 140(5)   | 97(4)  | 259(7)   | -64(4)    | -40(5)   | -11(3)    |
| C31 | 138(4)   | 94(3)  | 218(6)   | 56(4)     | -19(4)   | -24(3)    |
| C35 | 122(4)   | 263(8) | 148(5)   | 106(5)    | 2(4)     | 9(5)      |
| C0  | 52(3)    | 45(4)  | 44(5)    | 0(3)      | 0(4)     | 5(3)      |
| N0  | 58(4)    | 45(2)  | 44(4)    | -5(3)     | 11(3)    | -5(3)     |
| N3  | 56(3)    | 41(3)  | 52(3)    | -9(3)     | 9(3)     | 1(3)      |
| C36 | 56(4)    | 47(4)  | 49(3)    | -1(3)     | 10(3)    | 1(3)      |
| C37 | 71(4)    | 54(4)  | 53(3)    | -10(3)    | 10(3)    | 5(3)      |
| C38 | 70(4)    | 54(3)  | 54(4)    | -5(3)     | 3(3)     | 4(3)      |
| C39 | 72(5)    | 58(4)  | 55(4)    | -11(3)    | 1(3)     | 10(3)     |
| C40 | 75(4)    | 64(4)  | 57(3)    | -13(3)    | 0(3)     | 10(3)     |

**Table 12** Bond Lengths for **4da**.

| Atom Atom Length/Å |     |           | Atom Atom Length/Å |     |           |
|--------------------|-----|-----------|--------------------|-----|-----------|
| Si1                | C15 | 1.861(3)  | C14                | C15 | 1.319(4)  |
| Si1                | C16 | 1.880(3)  | C10                | C11 | 1.370(4)  |
| Si1                | C22 | 1.882(3)  | C1                 | C2  | 1.381(11) |
| Si1                | C19 | 1.888(4)  | C12                | C11 | 1.364(4)  |
| Si2                | C26 | 1.860(3)  | C4                 | C3  | 1.345(11) |
| Si2                | C27 | 1.881(3)  | C27                | C29 | 1.530(5)  |
| Si2                | C30 | 1.876(4)  | C27                | C28 | 1.542(4)  |
| Si2                | C33 | 1.900(4)  | C16                | C18 | 1.527(5)  |
| F1                 | C11 | 1.361(3)  | C16                | C17 | 1.546(6)  |
| C7                 | N2  | 1.313(16) | C22                | C24 | 1.525(5)  |

|     |     |           |     |     |           |
|-----|-----|-----------|-----|-----|-----------|
| C7  | C6  | 1.403(19) | C22 | C23 | 1.525(4)  |
| N2  | C5  | 1.422(10) | C3  | C2  | 1.402(9)  |
| N2  | C4  | 1.398(17) | C19 | C21 | 1.511(5)  |
| N1  | C5  | 1.341(16) | C19 | C20 | 1.487(5)  |
| N1  | C6  | 1.355(16) | C30 | C32 | 1.544(6)  |
| C5  | C1  | 1.40(2)   | C30 | C31 | 1.542(6)  |
| C6  | C8  | 1.479(3)  | C34 | C33 | 1.517(5)  |
| C6  | C0  | 1.406(18) | C33 | C35 | 1.396(6)  |
| C6  | N3  | 1.348(15) | C0  | N0  | 1.326(15) |
| C9  | C8  | 1.407(3)  | N0  | C36 | 1.417(10) |
| C9  | C25 | 1.485(3)  | N0  | C38 | 1.400(17) |
| C9  | C10 | 1.393(4)  | N3  | C36 | 1.341(17) |
| C8  | C13 | 1.412(3)  | C36 | C37 | 1.40(2)   |
| C25 | C26 | 1.324(4)  | C37 | C40 | 1.385(10) |
| C13 | C14 | 1.476(3)  | C38 | C39 | 1.332(10) |
| C13 | C12 | 1.401(4)  | C39 | C40 | 1.403(9)  |

**Table 13** Bond Angles for **4da**.

| Atom Atom Atom Angle/° |     |     |            | Atom Atom Atom Angle/° |     |     |           |
|------------------------|-----|-----|------------|------------------------|-----|-----|-----------|
| C15                    | Si1 | C16 | 108.86(15) | C2                     | C1  | C5  | 120.2(9)  |
| C15                    | Si1 | C22 | 109.62(13) | C25                    | C26 | Si2 | 128.1(2)  |
| C15                    | Si1 | C19 | 104.70(15) | C11                    | C12 | C13 | 119.5(2)  |
| C16                    | Si1 | C22 | 108.11(15) | C3                     | C4  | N2  | 117.8(9)  |
| C16                    | Si1 | C19 | 108.86(17) | F1                     | C11 | C10 | 118.3(3)  |
| C22                    | Si1 | C19 | 116.48(19) | F1                     | C11 | C12 | 118.8(3)  |
| C26                    | Si2 | C27 | 109.48(14) | C12                    | C11 | C10 | 122.9(3)  |
| C26                    | Si2 | C30 | 107.10(17) | C29                    | C27 | Si2 | 113.6(3)  |
| C26                    | Si2 | C33 | 108.59(16) | C29                    | C27 | C28 | 110.6(3)  |
| C27                    | Si2 | C33 | 110.9(2)   | C28                    | C27 | Si2 | 113.7(3)  |
| C30                    | Si2 | C27 | 108.92(18) | C18                    | C16 | Si1 | 113.5(3)  |
| C30                    | Si2 | C33 | 111.7(2)   | C18                    | C16 | C17 | 109.7(3)  |
| N2                     | C7  | C6  | 108.8(13)  | C17                    | C16 | Si1 | 111.5(2)  |
| C7                     | N2  | C5  | 104.4(19)  | C24                    | C22 | Si1 | 113.9(2)  |
| C7                     | N2  | C4  | 132.2(12)  | C23                    | C22 | Si1 | 114.2(3)  |
| C4                     | N2  | C5  | 123.3(14)  | C23                    | C22 | C24 | 111.2(3)  |
| C5                     | N1  | C6  | 103.8(12)  | C4                     | C3  | C2  | 121.5(10) |
| N1                     | C5  | N2  | 113(2)     | C1                     | C2  | C3  | 120.9(10) |
| N1                     | C5  | C1  | 131.1(13)  | C21                    | C19 | Si1 | 114.9(3)  |
| C1                     | C5  | N2  | 116.3(15)  | C20                    | C19 | Si1 | 116.4(3)  |
| C7                     | C6  | C8  | 129.4(7)   | C20                    | C19 | C21 | 111.3(4)  |
| N1                     | C6  | C7  | 110.3(7)   | C32                    | C30 | Si2 | 111.2(3)  |
| N1                     | C6  | C8  | 120.2(6)   | C31                    | C30 | Si2 | 111.3(3)  |
| C0                     | C6  | C8  | 130.1(7)   | C31                    | C30 | C32 | 111.5(4)  |
| N3                     | C6  | C8  | 120.2(6)   | C34                    | C33 | Si2 | 114.2(3)  |
| N3                     | C6  | C0  | 109.7(6)   | C35                    | C33 | Si2 | 119.2(4)  |
| C8                     | C9  | C25 | 122.3(2)   | C35                    | C33 | C34 | 116.7(4)  |

|     |     |     |          |     |     |     |           |
|-----|-----|-----|----------|-----|-----|-----|-----------|
| C10 | C9  | C8  | 119.9(2) | N0  | C0  | C6  | 109.0(12) |
| C10 | C9  | C25 | 117.7(2) | C0  | N0  | C36 | 104.2(18) |
| C9  | C8  | C6  | 120.6(2) | C0  | N0  | C38 | 133.3(12) |
| C9  | C8  | C13 | 119.5(2) | C38 | N0  | C36 | 122.5(14) |
| C13 | C8  | C6  | 119.9(2) | C36 | N3  | C6  | 104.8(12) |
| C26 | C25 | C9  | 125.2(2) | N3  | C36 | N0  | 112(2)    |
| C8  | C13 | C14 | 122.3(2) | N3  | C36 | C37 | 130.7(13) |
| C12 | C13 | C8  | 119.1(2) | C37 | C36 | N0  | 117.0(15) |
| C12 | C13 | C14 | 118.6(2) | C40 | C37 | C36 | 119.6(9)  |
| C15 | C14 | C13 | 126.4(3) | C39 | C38 | N0  | 118.7(9)  |
| C14 | C15 | Si1 | 128.7(2) | C38 | C39 | C40 | 121.2(9)  |
| C11 | C10 | C9  | 119.0(3) | C37 | C40 | C39 | 121.1(9)  |

**Table 14** Torsion Angles for **4da**.

| <b>A</b> | <b>B</b> | <b>C</b> | <b>D</b> | <b>Angle/°</b> | <b>A</b> | <b>B</b> | <b>C</b> | <b>D</b> | <b>Angle/°</b> |
|----------|----------|----------|----------|----------------|----------|----------|----------|----------|----------------|
| C7       | N2       | C5       | N1       | -2(2)          | C10      | C9       | C25      | C26      | -30.5(4)       |
| C7       | N2       | C5       | C1       | 179.1(18)      | C26      | Si2      | C27      | C29      | 64.1(3)        |
| C7       | N2       | C4       | C3       | -179(2)        | C26      | Si2      | C27      | C28      | -168.3(3)      |
| C7       | C6       | C8       | C9       | 128.4(15)      | C26      | Si2      | C30      | C32      | -58.6(3)       |
| C7       | C6       | C8       | C13      | -51.5(15)      | C26      | Si2      | C30      | C31      | 66.4(4)        |
| N2       | C7       | C6       | N1       | 0(2)           | C12      | C13      | C14      | C15      | -20.6(5)       |
| N2       | C7       | C6       | C8       | -178.8(10)     | C4       | N2       | C5       | N1       | 179.3(16)      |
| N2       | C5       | C1       | C2       | 0(2)           | C4       | N2       | C5       | C1       | 0(3)           |
| N2       | C4       | C3       | C2       | 1.0(17)        | C4       | C3       | C2       | C1       | -0.6(16)       |
| N1       | C5       | C1       | C2       | -179(2)        | C27      | Si2      | C26      | C25      | 20.4(4)        |
| N1       | C6       | C8       | C9       | -50.5(12)      | C27      | Si2      | C30      | C32      | -176.9(3)      |
| N1       | C6       | C8       | C13      | 129.6(12)      | C27      | Si2      | C30      | C31      | -51.9(4)       |
| C5       | N2       | C4       | C3       | -1(2)          | C16      | Si1      | C15      | C14      | -89.7(3)       |
| C5       | N1       | C6       | C7       | -1(2)          | C16      | Si1      | C22      | C24      | -49.2(3)       |
| C5       | N1       | C6       | C8       | 177.9(11)      | C16      | Si1      | C22      | C23      | -178.5(3)      |
| C5       | C1       | C2       | C3       | -0.1(17)       | C16      | Si1      | C19      | C21      | 61.1(4)        |
| C6       | C7       | N2       | C5       | 1(2)           | C16      | Si1      | C19      | C20      | -166.3(4)      |
| C6       | C7       | N2       | C4       | 179.7(17)      | C22      | Si1      | C15      | C14      | 28.4(3)        |
| C6       | N1       | C5       | N2       | 2(2)           | C22      | Si1      | C16      | C18      | -178.6(3)      |
| C6       | N1       | C5       | C1       | -179(2)        | C22      | Si1      | C16      | C17      | -54.1(3)       |
| C6       | C8       | C13      | C14      | -3.5(4)        | C22      | Si1      | C19      | C21      | -61.4(4)       |
| C6       | C8       | C13      | C12      | 178.0(3)       | C22      | Si1      | C19      | C20      | 71.2(4)        |
| C6       | C0       | N0       | C36      | 0(2)           | C19      | Si1      | C15      | C14      | 154.0(3)       |
| C6       | C0       | N0       | C38      | -179.9(16)     | C19      | Si1      | C16      | C18      | 54.0(3)        |
| C6       | N3       | C36      | N0       | -1(2)          | C19      | Si1      | C16      | C17      | 178.5(3)       |
| C6       | N3       | C36      | C37      | -179(2)        | C19      | Si1      | C22      | C24      | 73.7(3)        |
| C9       | C8       | C13      | C14      | 176.6(2)       | C19      | Si1      | C22      | C23      | -55.6(3)       |
| C9       | C8       | C13      | C12      | -2.0(4)        | C30      | Si2      | C26      | C25      | -97.5(3)       |
| C9       | C25      | C26      | Si2      | 173.4(2)       | C30      | Si2      | C27      | C29      | -179.1(3)      |
| C9       | C10      | C11      | F1       | 179.3(3)       | C30      | Si2      | C27      | C28      | -51.5(3)       |
| C9       | C10      | C11      | C12      | 0.7(6)         | C33      | Si2      | C26      | C25      | 141.7(3)       |

|                           |                           |
|---------------------------|---------------------------|
| C8 C6 C0 N0 179.1(9)      | C33 Si2 C27 C29 -55.8(3)  |
| C8 C6 N3 C36 -178.8(11)   | C33 Si2 C27 C28 71.9(3)   |
| C8 C9 C25 C26 150.4(3)    | C33 Si2 C30 C32 60.2(4)   |
| C8 C9 C10 C11 -1.7(4)     | C33 Si2 C30 C31 -174.8(3) |
| C8 C13 C14 C15 160.9(3)   | C0 C6 C8 C9 -49.7(15)     |
| C8 C13 C12 C11 0.9(5)     | C0 C6 C8 C13 130.3(15)    |
| C25 C9 C8 C6 1.4(4)       | C0 C6 N3 C36 1(2)         |
| C25 C9 C8 C13 -178.6(2)   | C0 N0 C36 N3 1(2)         |
| C25 C9 C10 C11 179.2(3)   | C0 N0 C36 C37 179.4(18)   |
| C13 C14 C15 Si1 175.8(2)  | C0 N0 C38 C39 -180.0(19)  |
| C13 C12 C11 F1 -178.9(3)  | N0 C36 C37 C40 0(2)       |
| C13 C12 C11 C10 -0.3(6)   | N0 C38 C39 C40 0.7(16)    |
| C14 C13 C12 C11 -177.7(3) | N3 C6 C8 C9 129.6(11)     |
| C15 Si1 C16 C18 -59.6(3)  | N3 C6 C8 C13 -50.3(12)    |
| C15 Si1 C16 C17 64.9(3)   | N3 C6 C0 N0 0(2)          |
| C15 Si1 C22 C24 -167.7(3) | N3 C36 C37 C40 179(2)     |
| C15 Si1 C22 C23 63.0(3)   | C36 N0 C38 C39 0(2)       |
| C15 Si1 C19 C21 177.3(3)  | C36 C37 C40 C39 0.6(17)   |
| C15 Si1 C19 C20 -50.1(4)  | C38 N0 C36 N3 -179.6(16)  |
| C10 C9 C8 C6 -177.6(2)    | C38 N0 C36 C37 -1(3)      |
| C10 C9 C8 C13 2.3(4)      | C38 C39 C40 C37 -1.2(15)  |

**Table 15** Hydrogen Atom Coordinates ( $\text{\AA}\times 10^4$ ) and Isotropic Displacement Parameters ( $\text{\AA}^2\times 10^3$ ) for **4da**.

| Atom | x       | y       | z       | U(eq) |
|------|---------|---------|---------|-------|
| H7   | 4900.54 | 5436.2  | 4539.18 | 59    |
| H25  | 2725.62 | 5340.96 | 3252.27 | 64    |
| H14  | 5548.28 | 5862.6  | 2948.25 | 66    |
| H15  | 6204.34 | 4258.17 | 2291.97 | 77    |
| H10  | 3028.28 | 3856.43 | 1342.68 | 80    |
| H1   | 3201.14 | 8313.72 | 4128.12 | 69    |
| H26  | 2160.84 | 4996.37 | 1428.44 | 83    |
| H12  | 5264.07 | 3948.56 | 1368.34 | 88    |
| H4A  | 4968.41 | 6679.45 | 6076.08 | 72    |
| H27  | 1557.51 | 5719.62 | 4051.65 | 93    |
| H16  | 8006.7  | 6246.85 | 2022.22 | 97    |
| H22  | 6678.74 | 6670.2  | 3687.18 | 91    |
| H3A  | 4477.59 | 8081.73 | 6567.09 | 79    |
| H2   | 3593.1  | 8889.64 | 5613.69 | 79    |
| H19  | 7755.13 | 3965.88 | 2492.57 | 112   |
| H30  | 171.6   | 4391.56 | 2819.27 | 118   |
| H24A | 8186.97 | 6402.6  | 4304.2  | 166   |
| H24B | 7682.15 | 7279.93 | 4574.38 | 166   |
| H24C | 7901.72 | 7127.65 | 3496.76 | 166   |
| H29A | 2056.92 | 6991.5  | 3198.7  | 170   |
| H29B | 1685.7  | 7323.46 | 4153.15 | 170   |

|               |         |         |           |
|---------------|---------|---------|-----------|
| H29C 1253.93  | 7475.26 | 3144.03 | 170       |
| H23A 6401.39  | 5354.68 | 4665.06 | 174       |
| H23B 6660.92  | 6278.43 | 5239.88 | 174       |
| H23C 7229.33  | 5425.52 | 5125.43 | 174       |
| H34A -401.72  | 6481.39 | 1001.02 | 176       |
| H34B -347.73  | 6208.07 | 2105.42 | 176       |
| H34C -335.41  | 5401.16 | 1313.42 | 176       |
| H18A 7861.52  | 4843.45 | 1116.1  | 187       |
| H18B 7799.36  | 5760.65 | 457.79  | 187       |
| H18C 7064.39  | 5203.56 | 717.47  | 187       |
| H28A 128.31   | 6545.48 | 3676.14 | 168       |
| H28B 552.79   | 6488.65 | 4700.18 | 168       |
| H28C 268.94   | 5546.48 | 4177.1  | 168       |
| H17A 6509.5   | 6679.3  | 1380.02 | 180       |
| H17B 7231.16  | 7238.58 | 1074.95 | 180       |
| H17C 6984.01  | 7285.63 | 2151.02 | 180       |
| H33 737.31    | 6767.56 | 1723.11 | 141       |
| H21A 8747.07  | 4942.43 | 2890.2  | 197       |
| H21B 8848.96  | 3921.36 | 3357.12 | 197       |
| H21C 8611.51  | 4792.48 | 3995.49 | 197       |
| H20A 7448.9   | 3836.16 | 4417.79 | 203       |
| H20B 7788.4   | 3020.65 | 3786.19 | 203       |
| H20C 6959.93  | 3387.92 | 3552.41 | 203       |
| H32A 393.8    | 3972.72 | 1241.34 | 251       |
| H32B 423.43   | 3043.76 | 1884.3  | 251       |
| H32C 1178.02  | 3518.56 | 1567.71 | 251       |
| H31A 1570.94  | 3539.48 | 3366.36 | 226       |
| H31B 774.78   | 3170.55 | 3660.18 | 226       |
| H31C 1093.39  | 4146.1  | 4074.79 | 226       |
| H35A 1471.96  | 6459.8  | 673.04  | 267       |
| H35B 661.41   | 6597.02 | 175.77  | 267       |
| H35C 1004.36  | 5563.77 | 303.05  | 267       |
| H0 3411.8     | 6978.87 | 3027.29 | 57        |
| H2A 5112.86   | 6399.81 | 6004.01 | 71        |
| H3 3351.72    | 8381.54 | 4443.01 | 71        |
| H4 3841.93    | 8759.88 | 5919.62 | 74        |
| H5 4732.29    | 7797.99 | 6694.35 | 79        |
| C7 0.497(12)  |         | H7      | 0.497(12) |
| N1 0.497(12)  |         | C5      | 0.497(12) |
| H1 0.497(12)  |         | C4      | 0.497(12) |
| C3 0.497(12)  |         | H3A     | 0.497(12) |
| H2 0.497(12)  |         | C0      | 0.503(12) |
| N0 0.503(12)  |         | N3      | 0.503(12) |
| C37 0.503(12) |         | H2A     | 0.503(12) |
| H3 0.503(12)  |         | C39     | 0.503(12) |
| C40 0.503(12) |         | H5      | 0.503(12) |

## 5. NMR charts

**3aa** |  $^1\text{H}$  NMR ( $\text{CDCl}_3$ , 600 MHz)

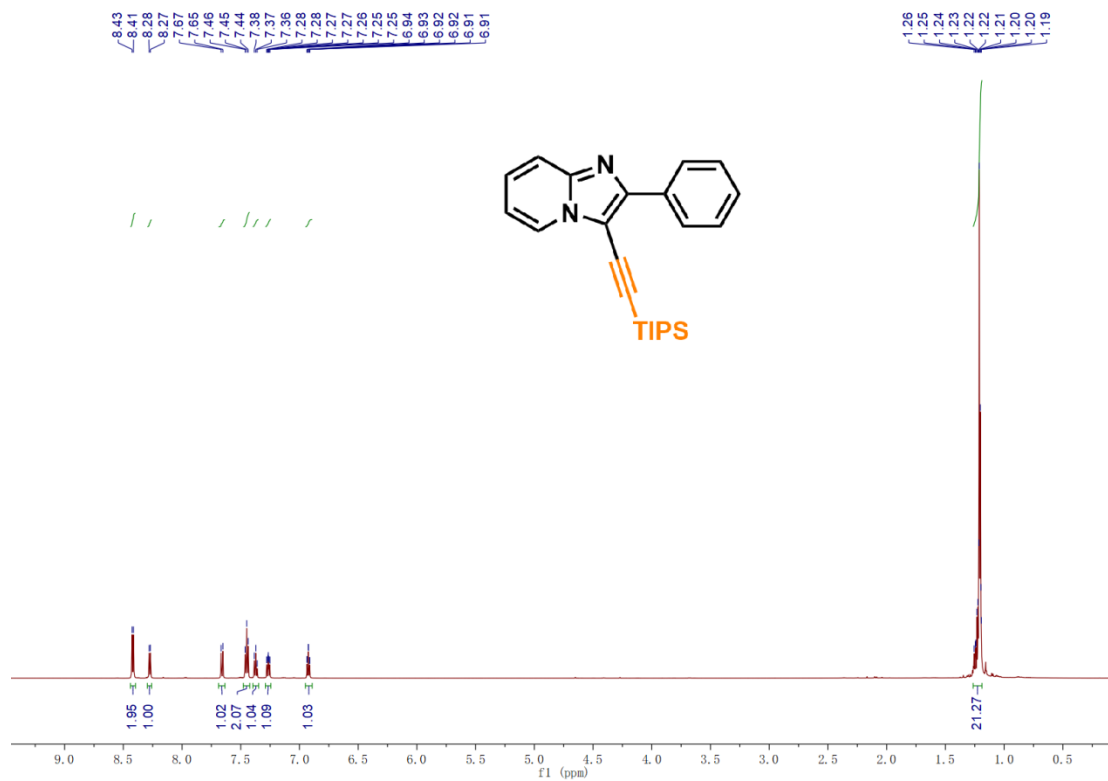

**3aa** |  $^{13}\text{C}\{^1\text{H}\}$  NMR ( $\text{CDCl}_3$ , 151 MHz)

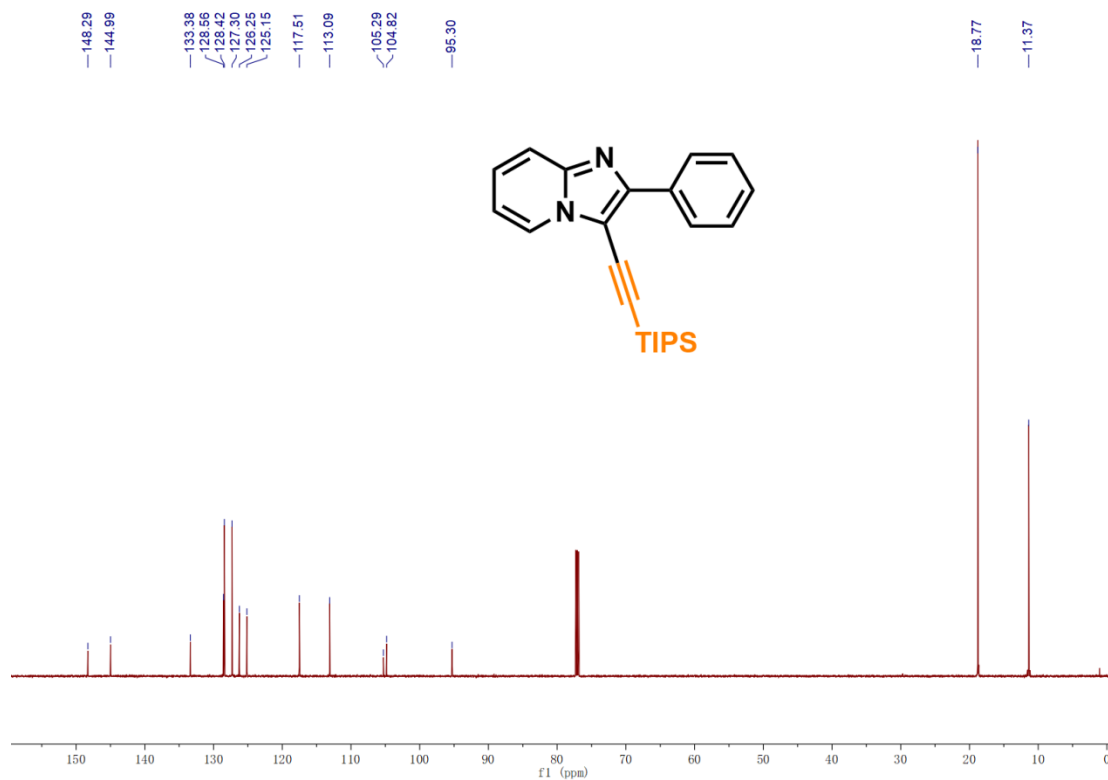

**3ba** |  $^1\text{H}$  NMR ( $\text{CDCl}_3$ , 600 MHz)

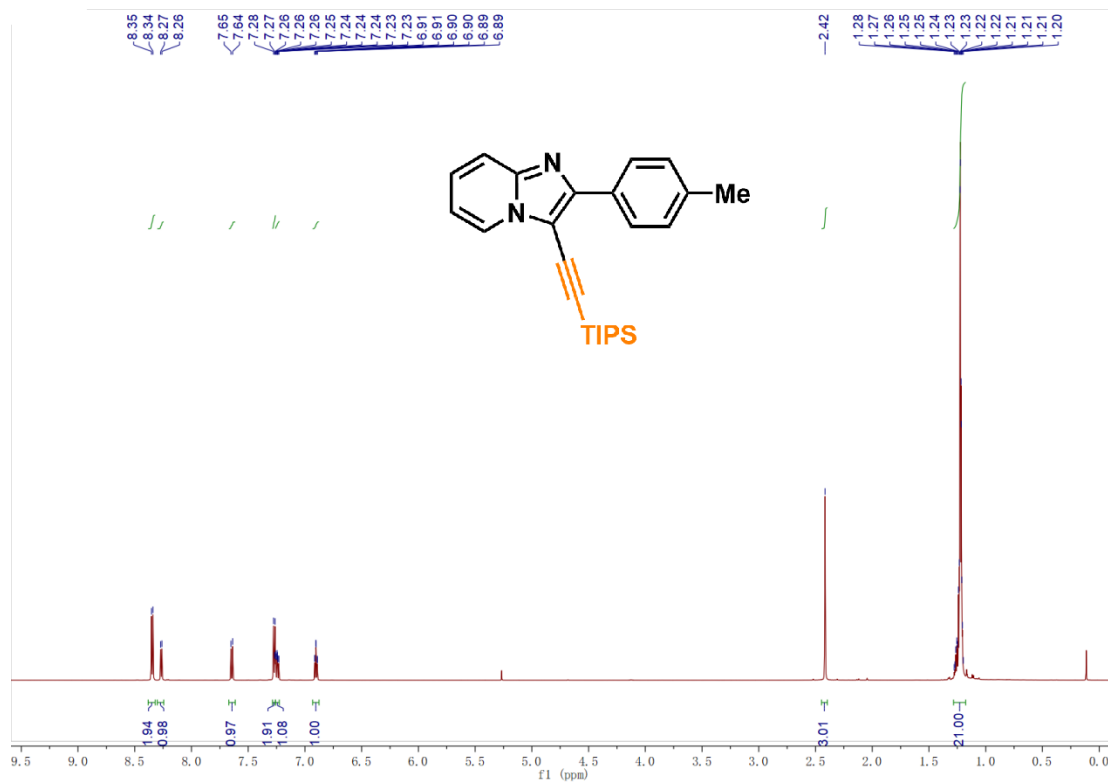

**3ba** |  $^{13}\text{C}\{^1\text{H}\}$  NMR ( $\text{CDCl}_3$ , 151 MHz)

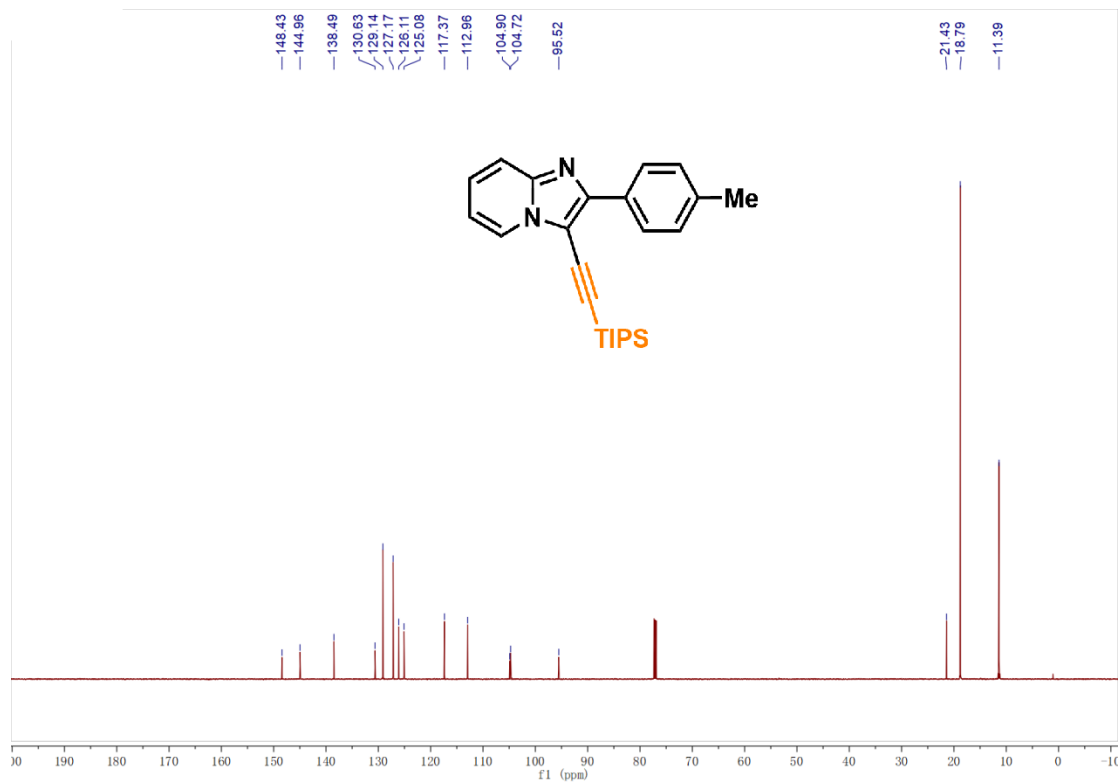

**3ca** |  $^1\text{H}$  NMR ( $\text{CDCl}_3$ , 600 MHz)

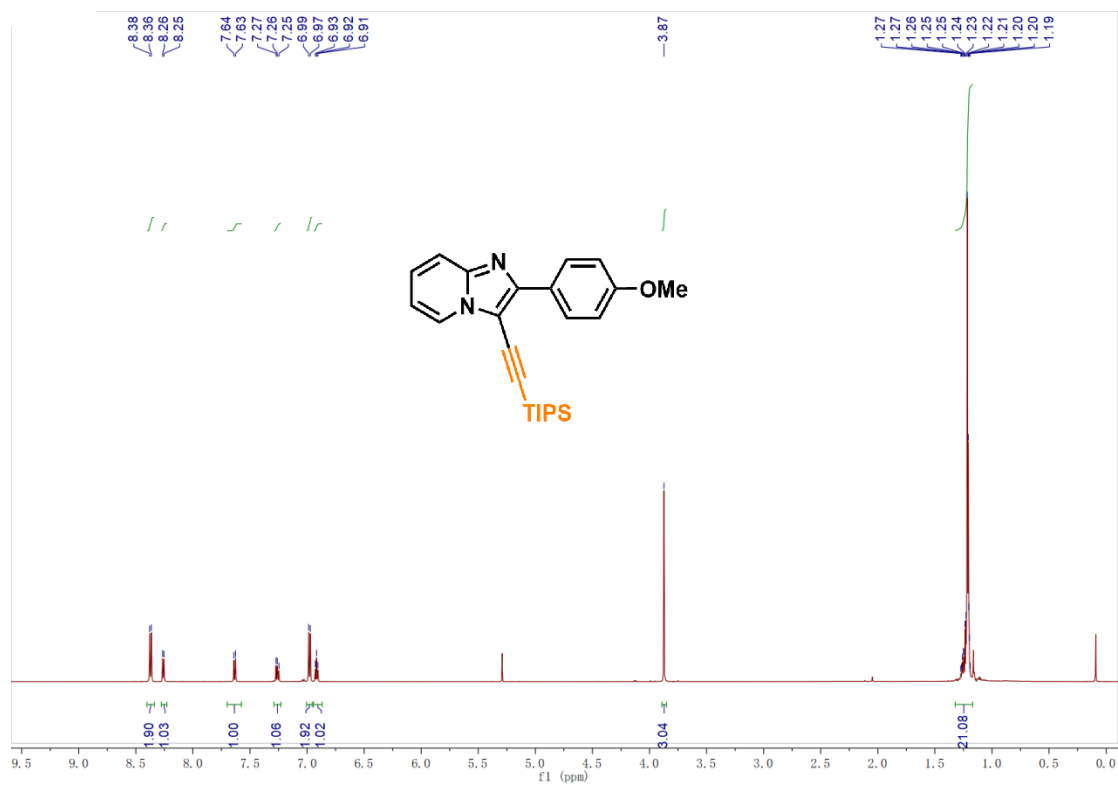

**3ca** |  $^{13}\text{C}\{^1\text{H}\}$  NMR ( $\text{CDCl}_3$ , 151 MHz)

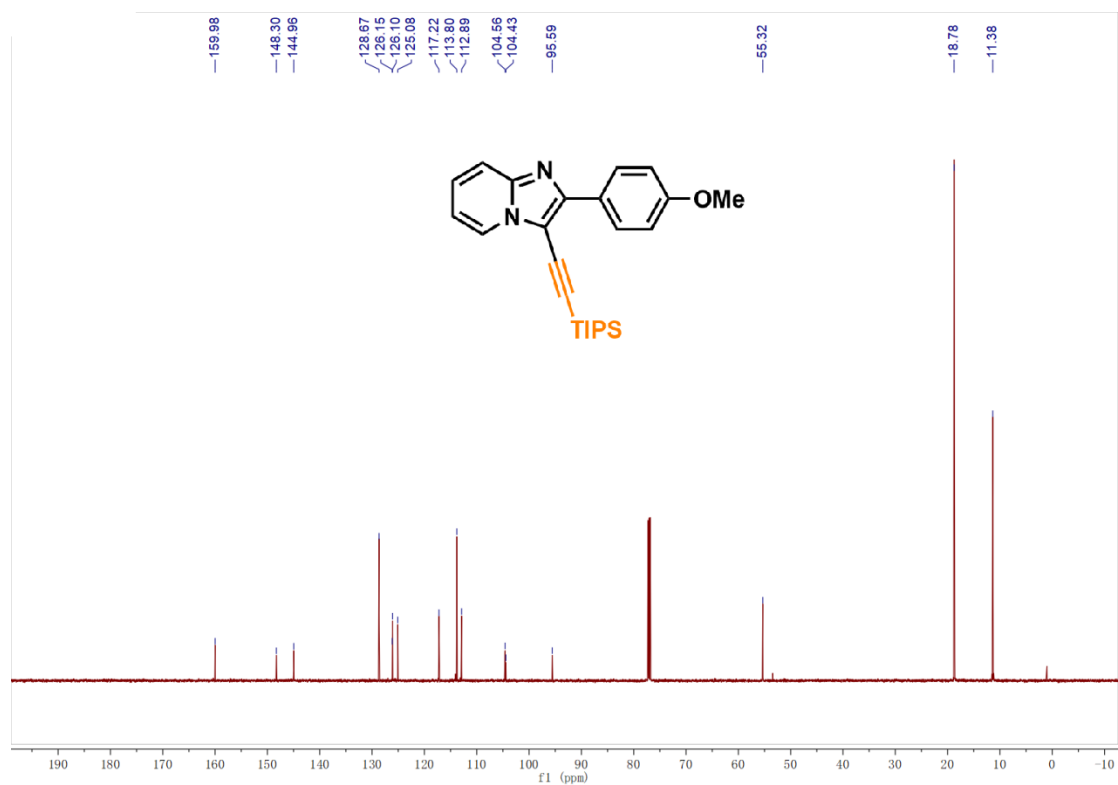

3da |  $^1\text{H}$  NMR ( $\text{CDCl}_3$ , 600 MHz)

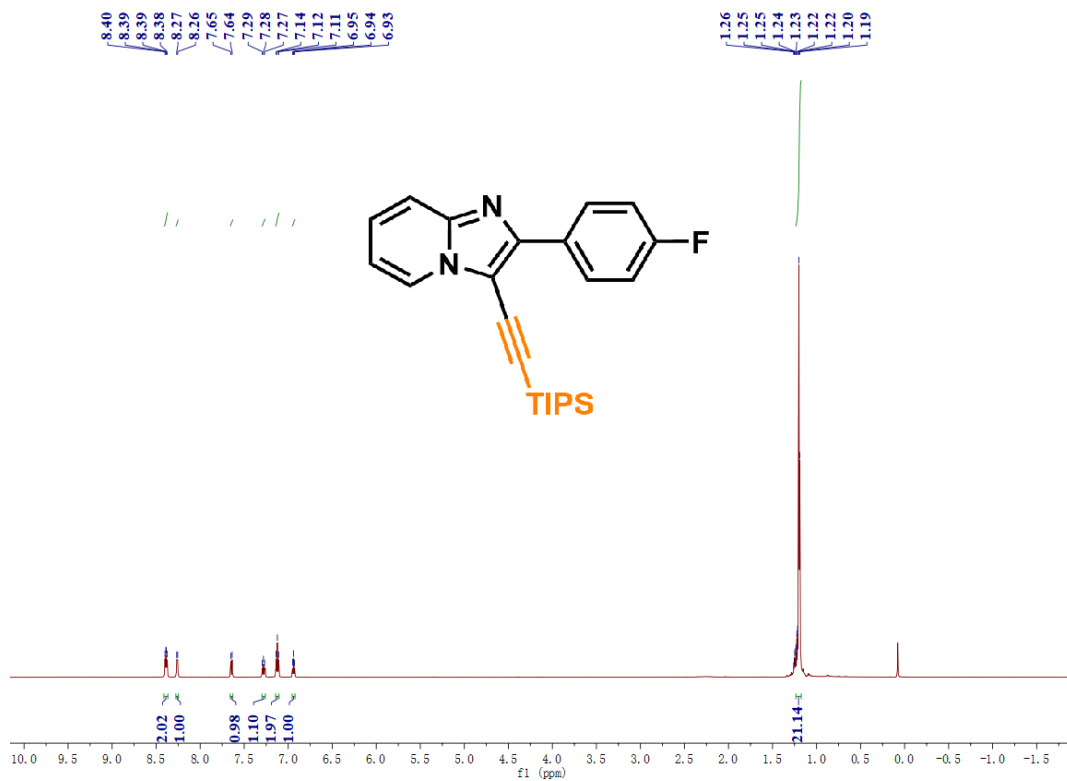

3da |  $^{13}\text{C}\{^1\text{H}\}$  NMR ( $\text{CDCl}_3$ , 151 MHz)

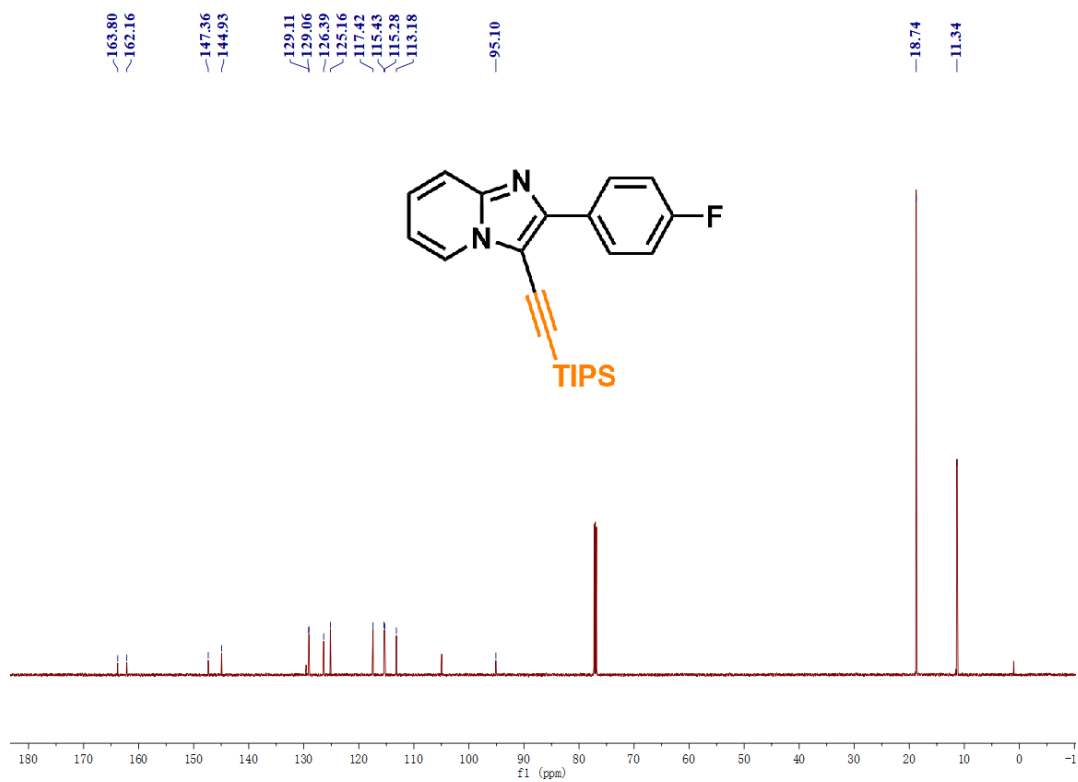

3da |  $^{19}\text{F}\{^1\text{H}\}$  NMR ( $\text{CDCl}_3$ , 565 MHz)

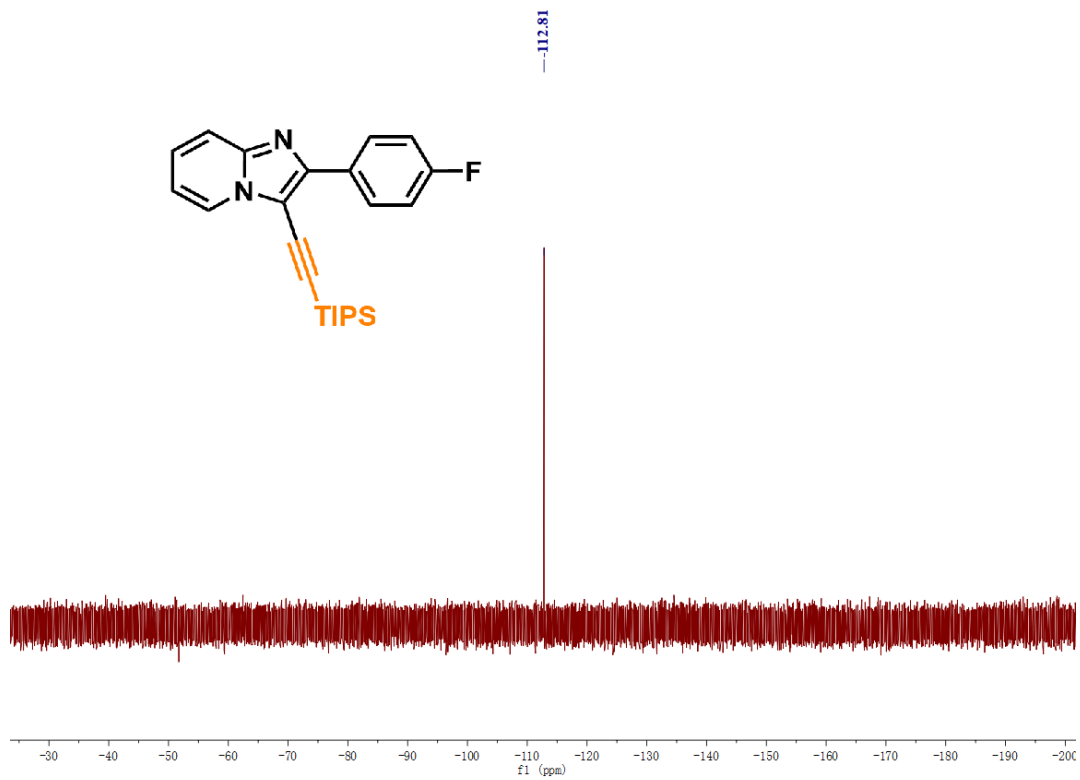

3ea |  $^1\text{H}$  NMR ( $\text{CDCl}_3$ , 600 MHz)

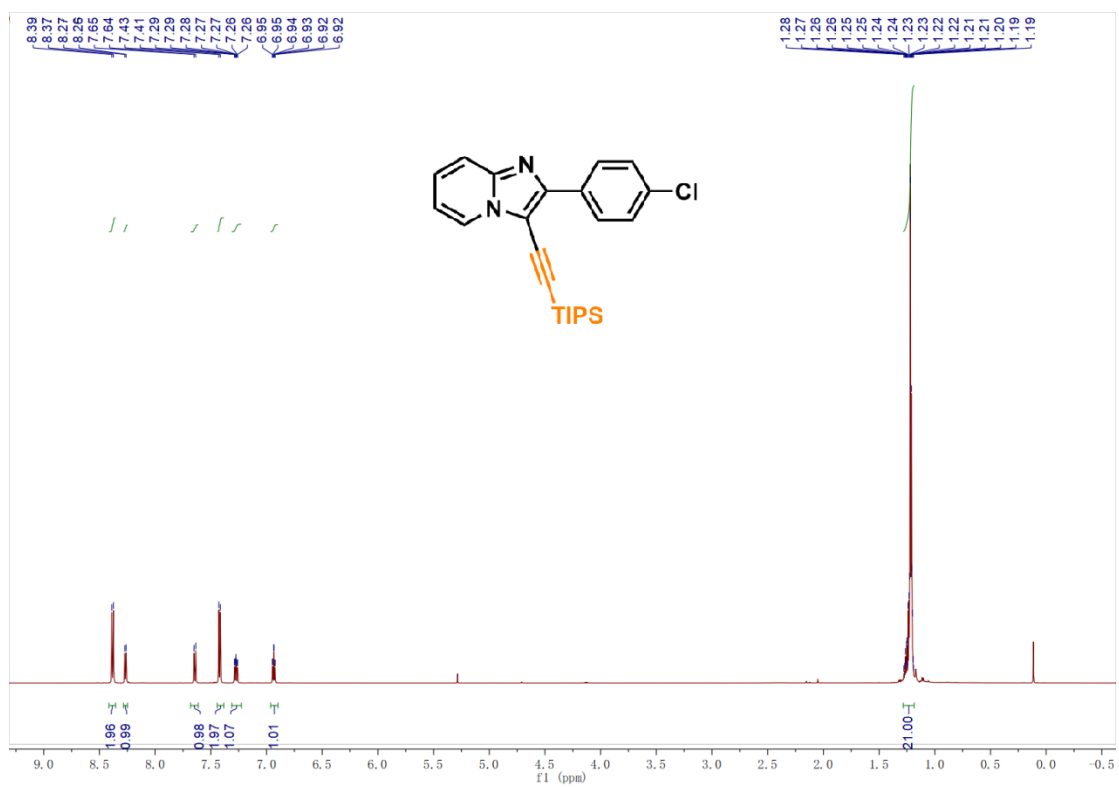

**3ea** |  $^{13}\text{C}\{^1\text{H}\}$  NMR ( $\text{CDCl}_3$ , 151 MHz)

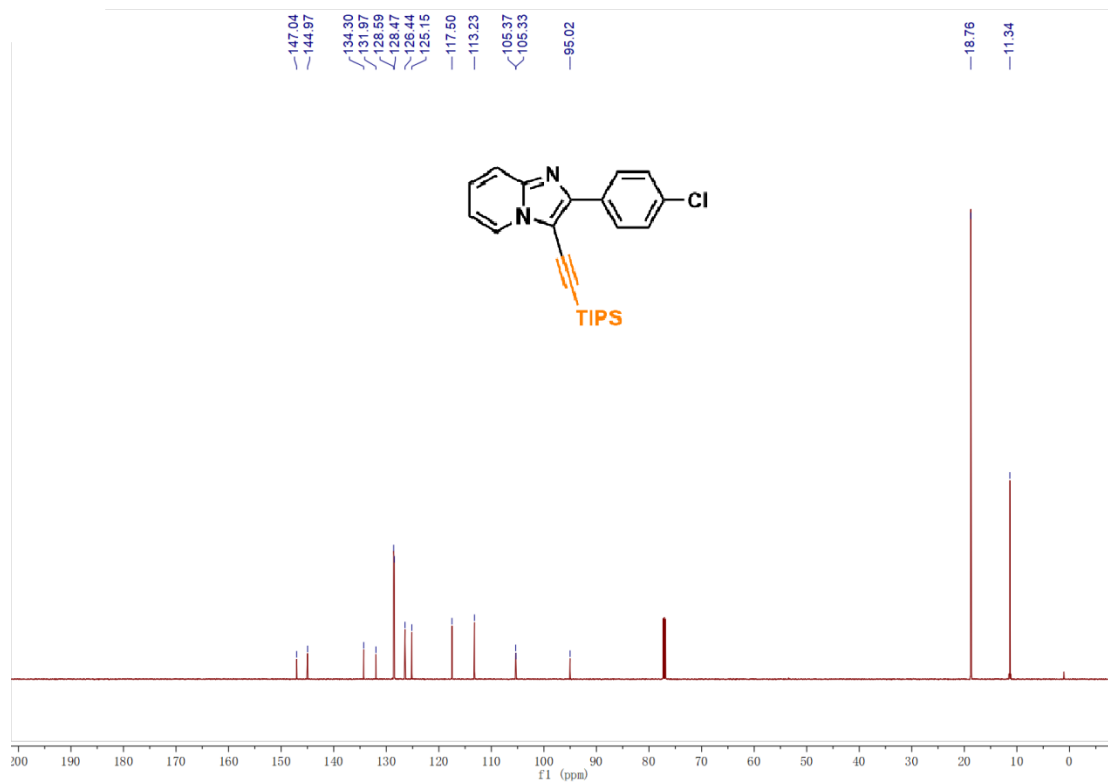

**3fa** |  $^1\text{H}$  NMR ( $\text{CDCl}_3$ , 600 MHz)

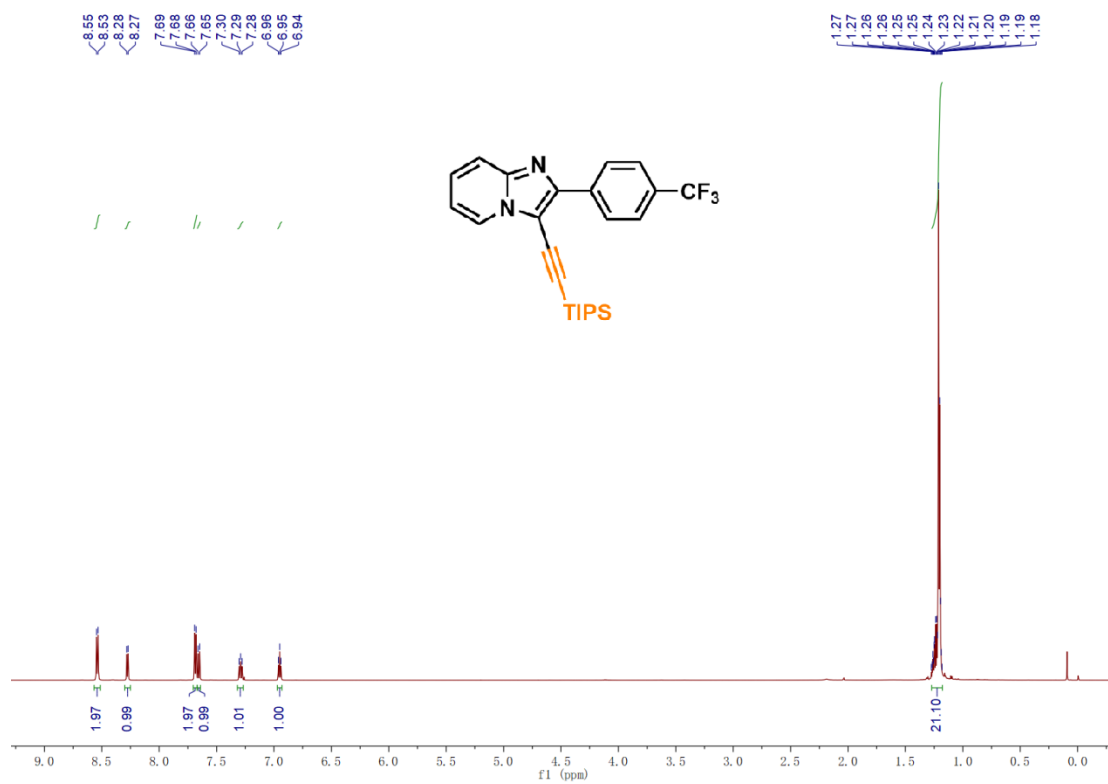

**3fa** |  $^{13}\text{C}\{^1\text{H}\}$  NMR ( $\text{CDCl}_3$ , 151 MHz)

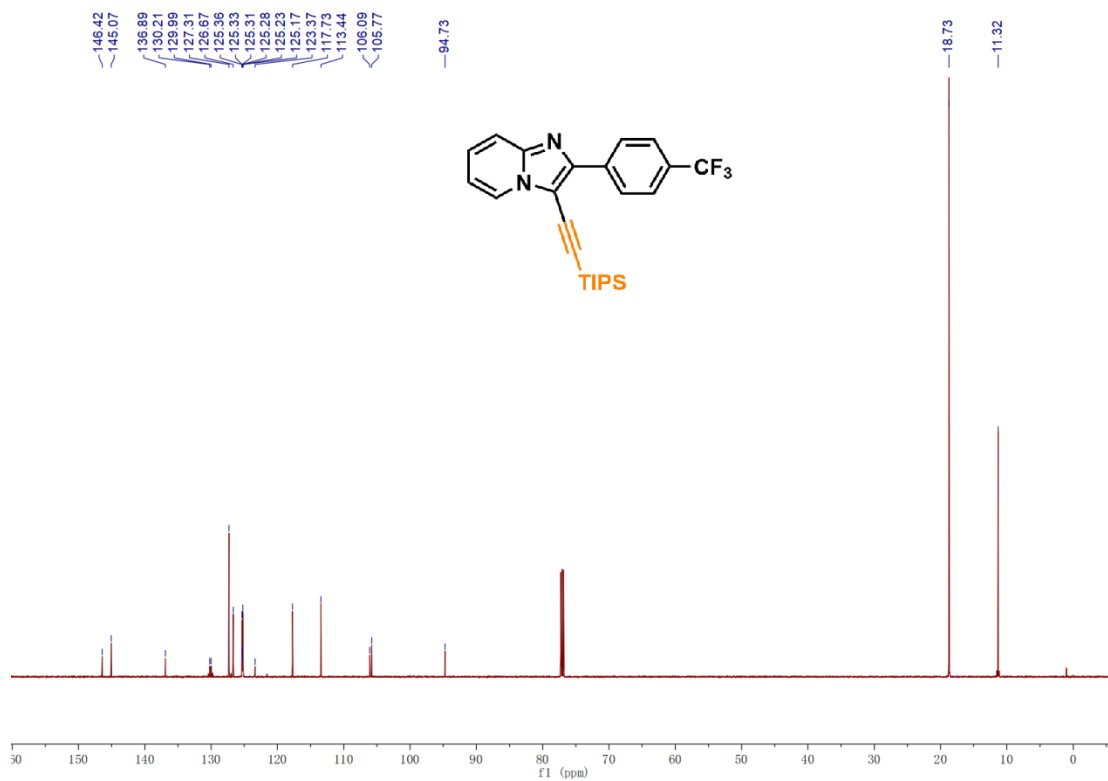

**3fa** |  $^{19}\text{F}\{^1\text{H}\}$  NMR ( $\text{CDCl}_3$ , 565 MHz)

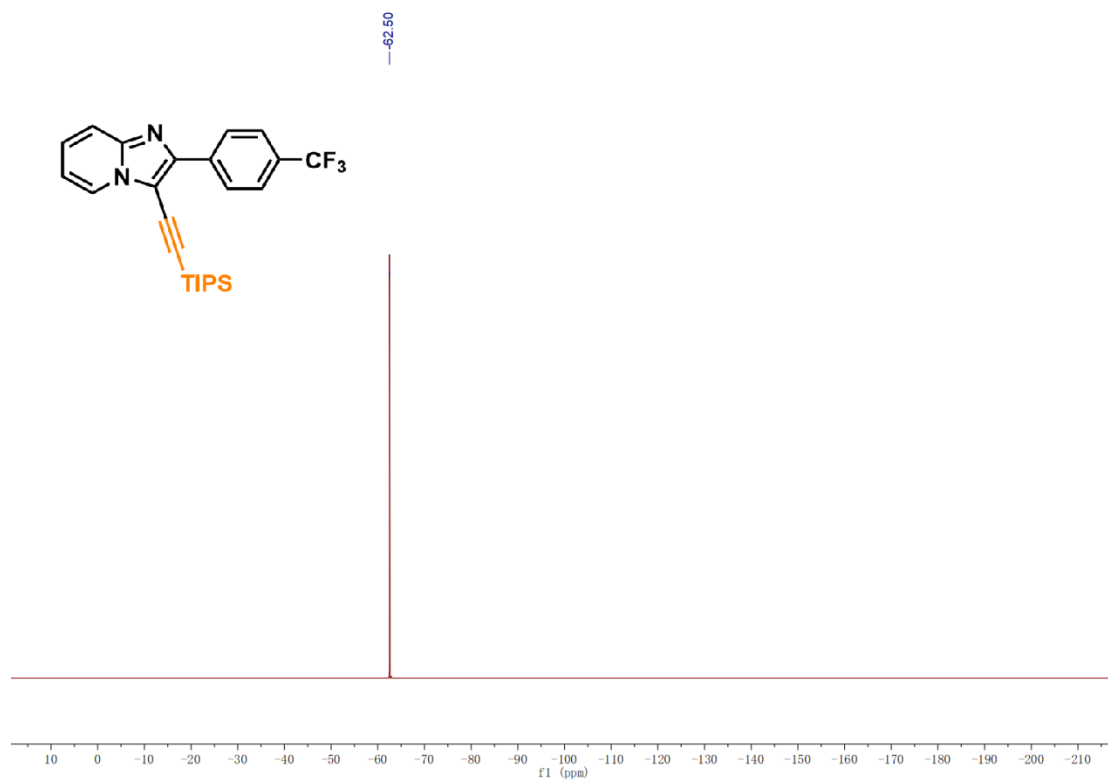

3ga | <sup>1</sup>H NMR (CDCl<sub>3</sub>, 600 MHz)

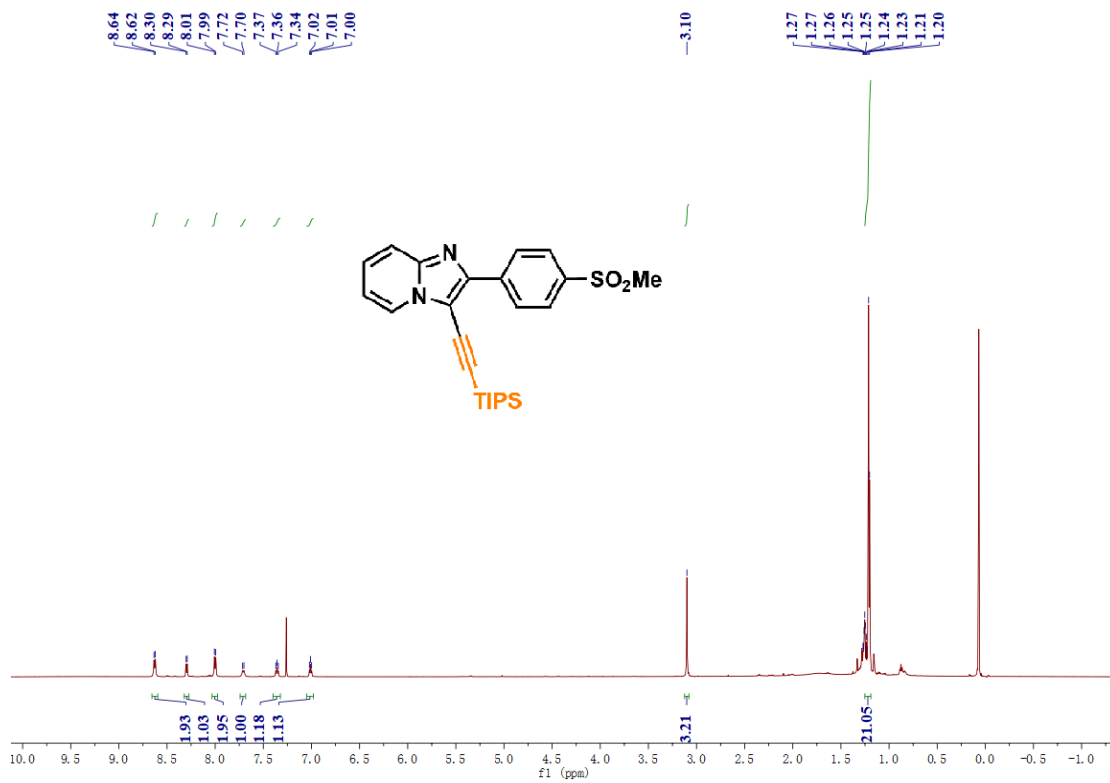

3ga | <sup>13</sup>C{<sup>1</sup>H} NMR (CDCl<sub>3</sub>, 151 MHz)

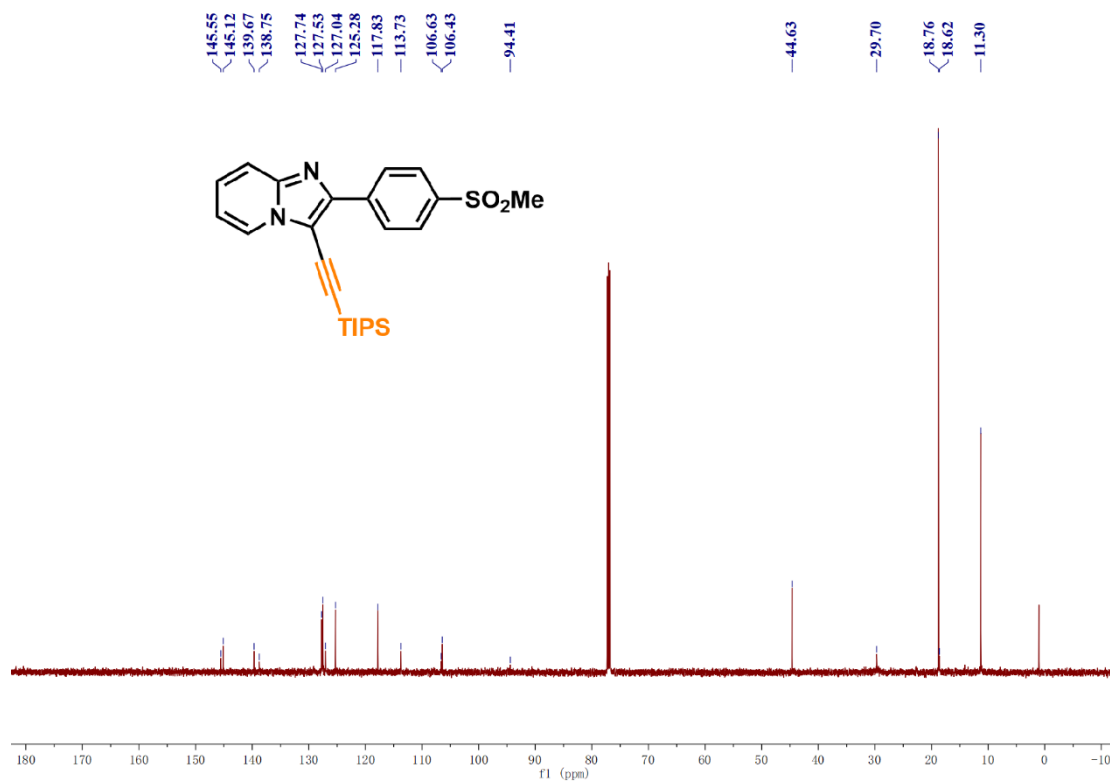

**3ha** |  $^1\text{H}$  NMR ( $\text{CDCl}_3$ , 600 MHz)

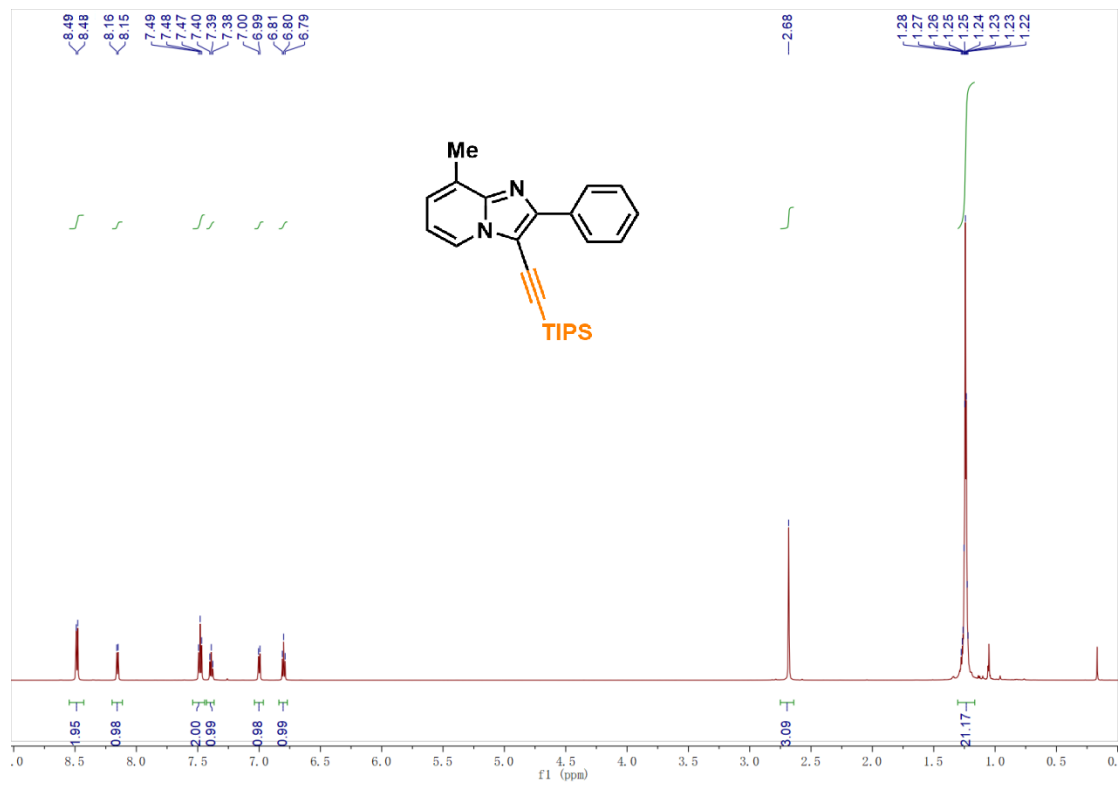

**3ha** |  $^{13}\text{C}\{^1\text{H}\}$  NMR ( $\text{CDCl}_3$ , 151 MHz)

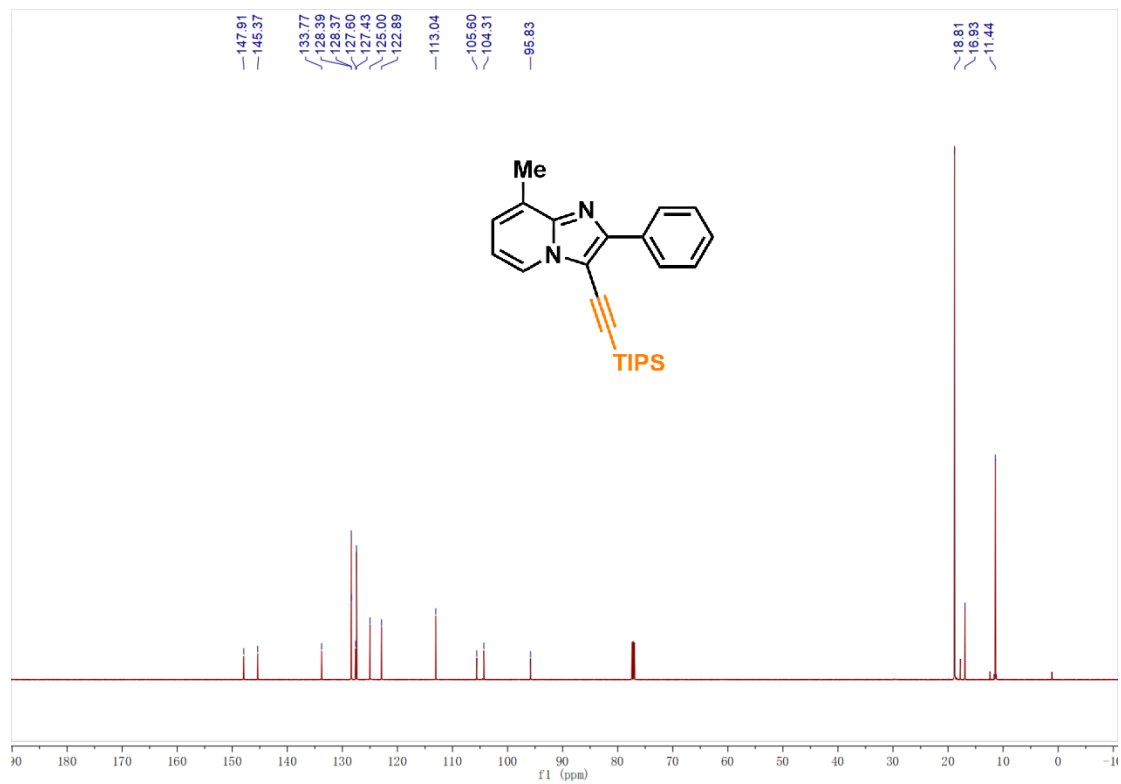

**3ia** |  $^1\text{H}$  NMR ( $\text{CDCl}_3$ , 600 MHz)

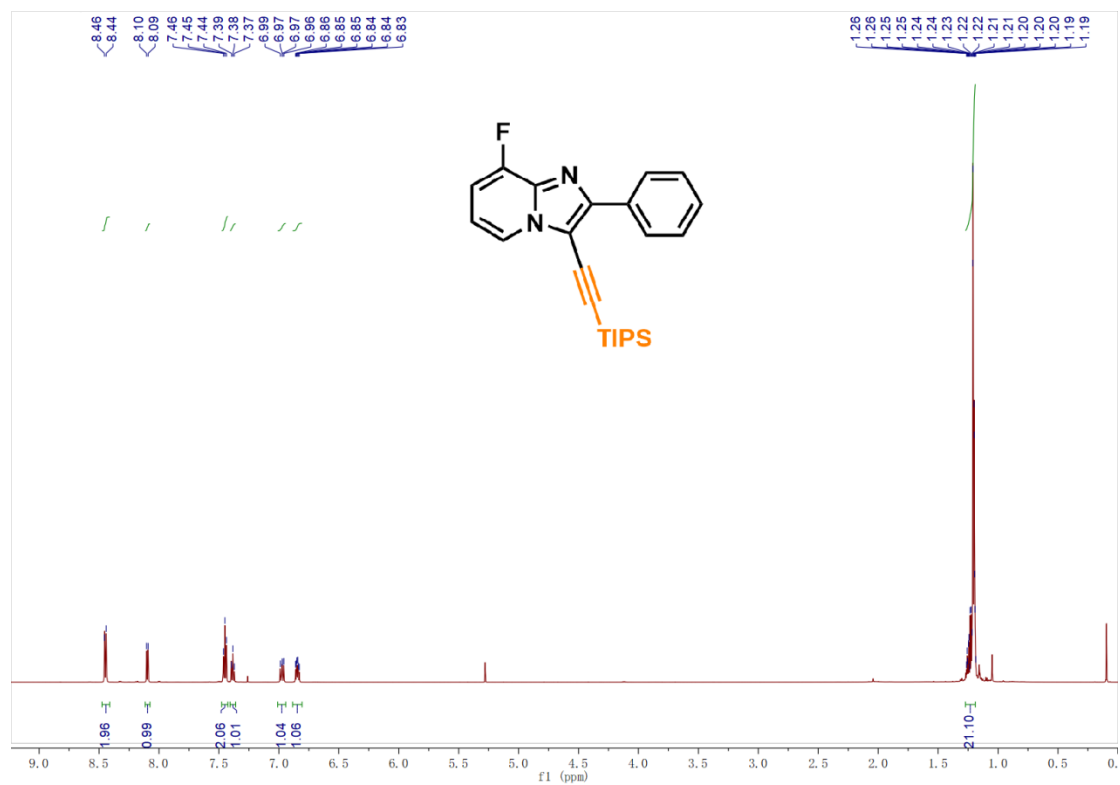

**3ia** |  $^{13}\text{C}\{^1\text{H}\}$  NMR ( $\text{CDCl}_3$ , 151 MHz)

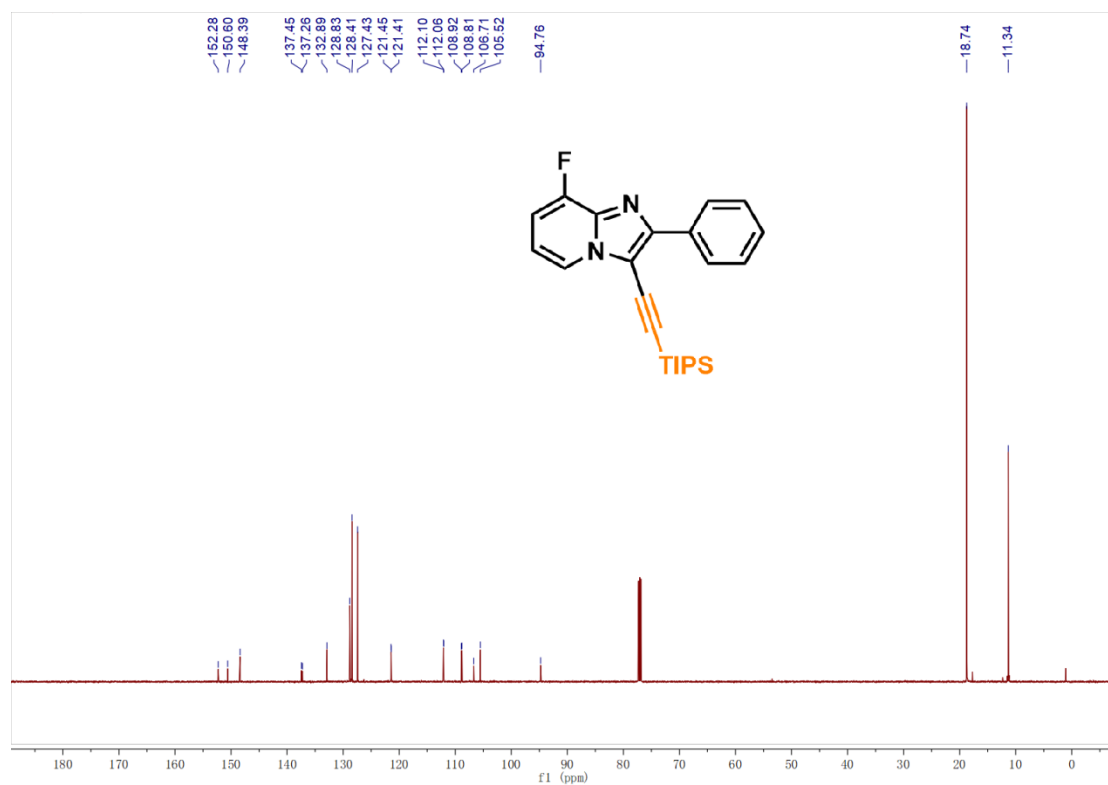

3ia |  $^{19}\text{F}\{^1\text{H}\}$  NMR ( $\text{CDCl}_3$ , 565 MHz)

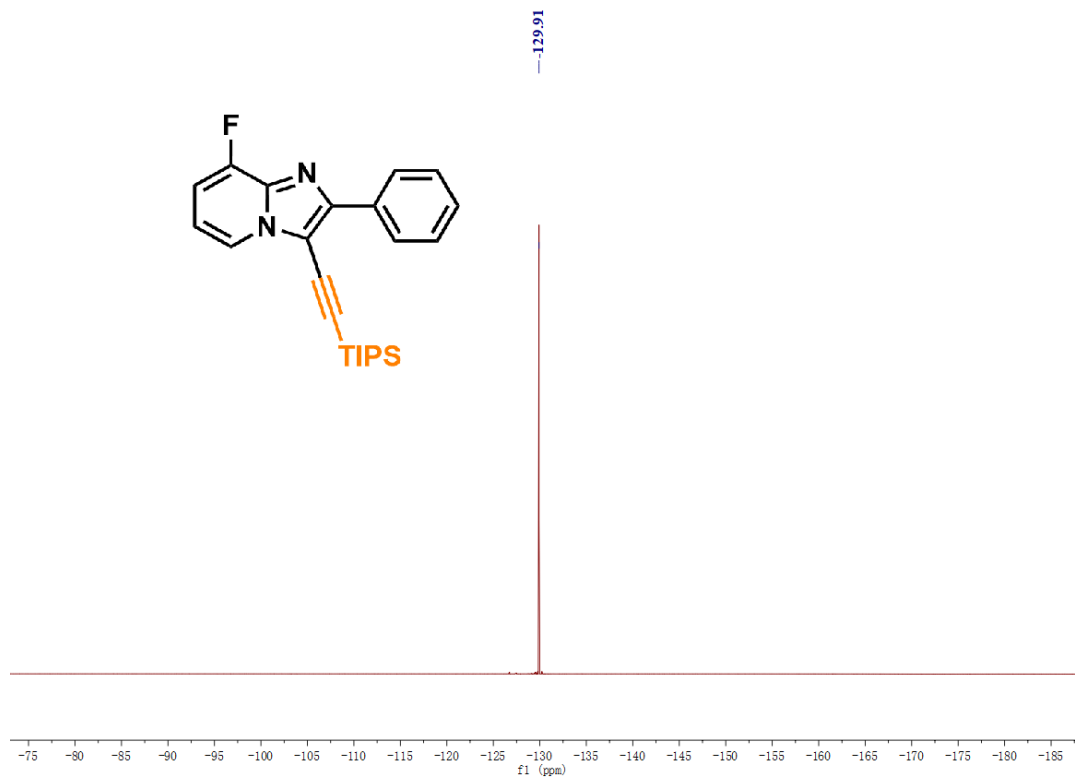

3ja |  $^1\text{H}$  NMR ( $\text{CDCl}_3$ , 600 MHz)

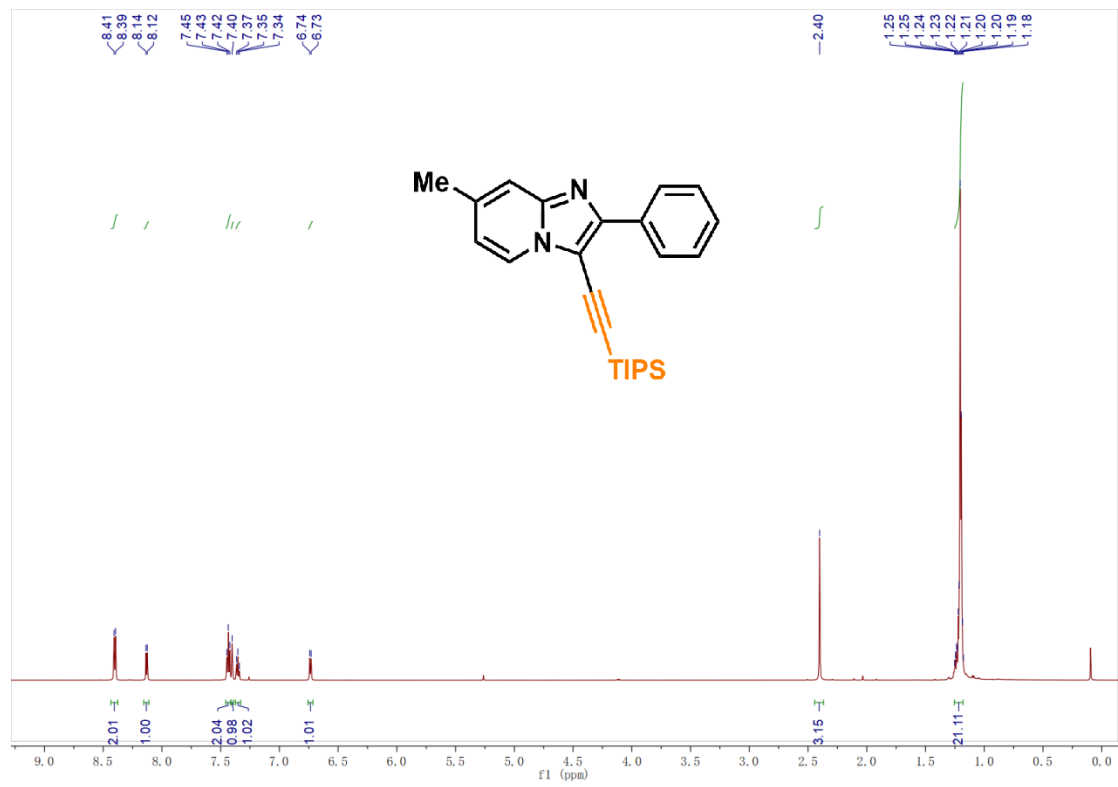

3ja |  $^{13}\text{C}\{^1\text{H}\}$  NMR ( $\text{CDCl}_3$ , 151 MHz)

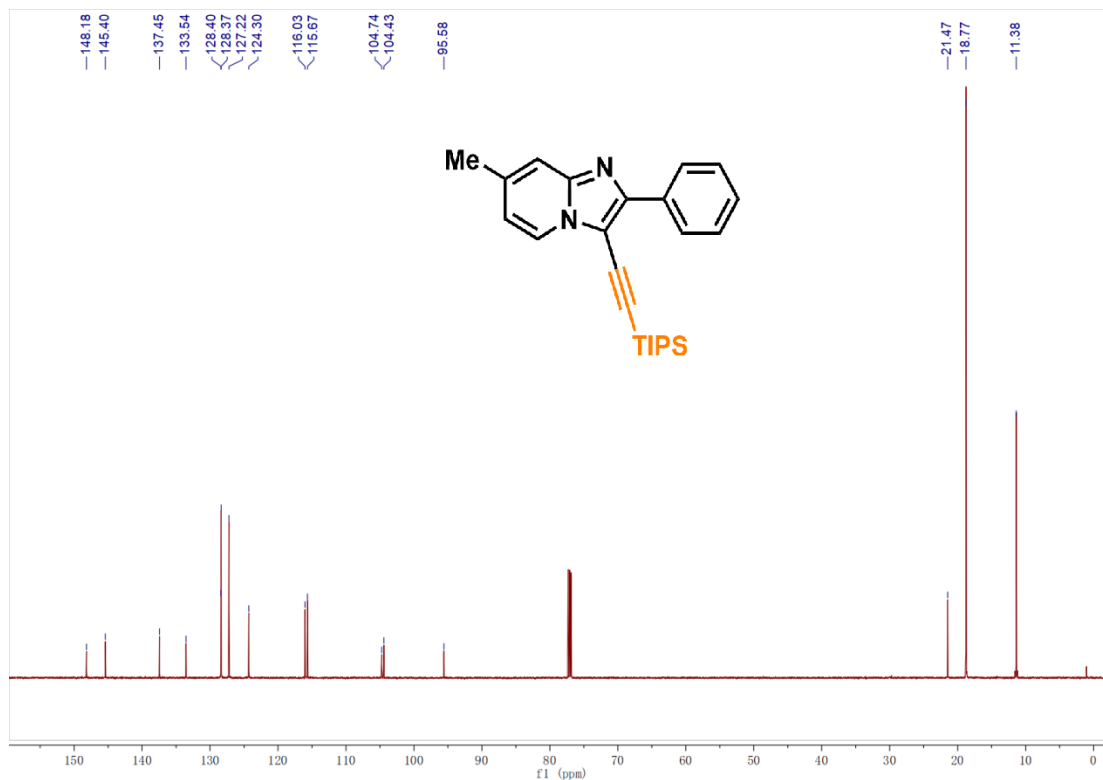

3ka |  $^1\text{H}$  NMR ( $\text{CDCl}_3$ , 600 MHz)

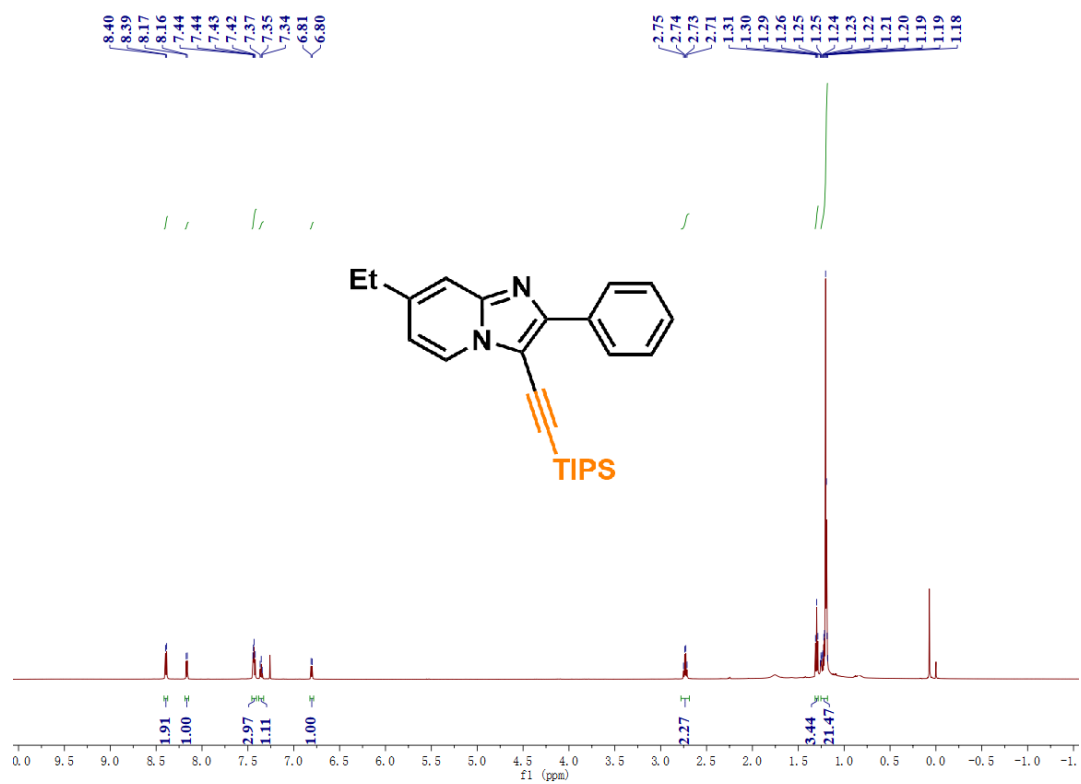

**3ka** |  $^{13}\text{C}\{^1\text{H}\}$  NMR ( $\text{CDCl}_3$ , 151 MHz)

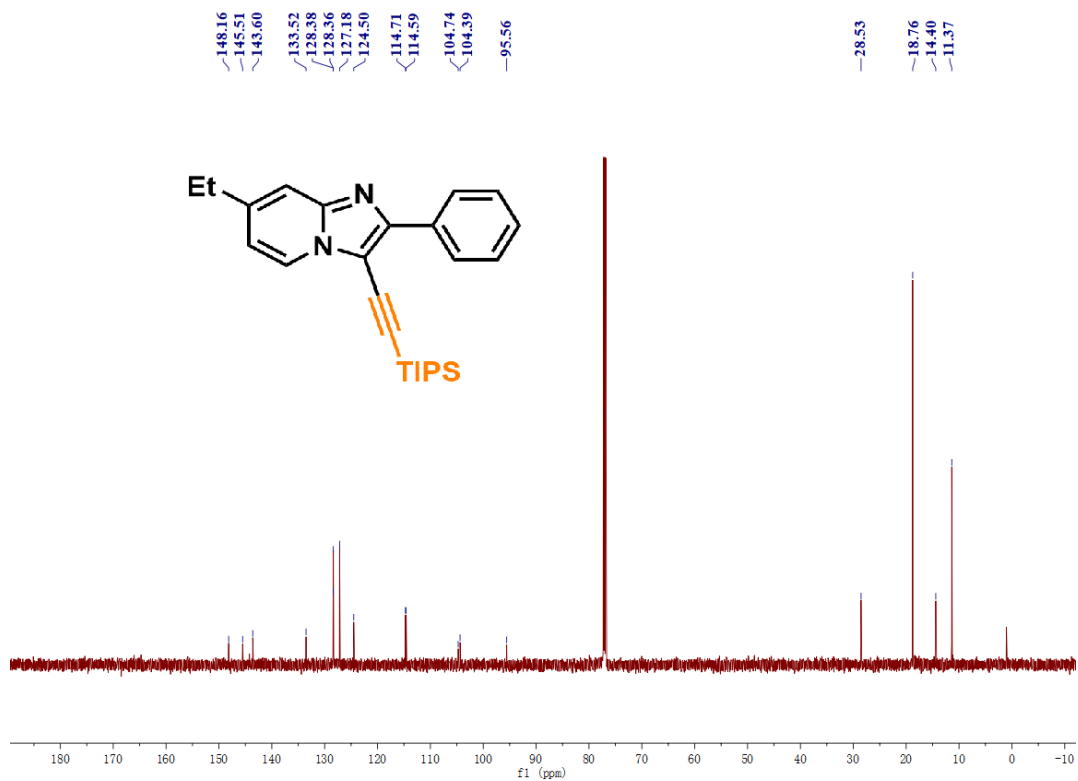

**3pa** |  $^1\text{H}$  NMR ( $\text{CDCl}_3$ , 600 MHz)

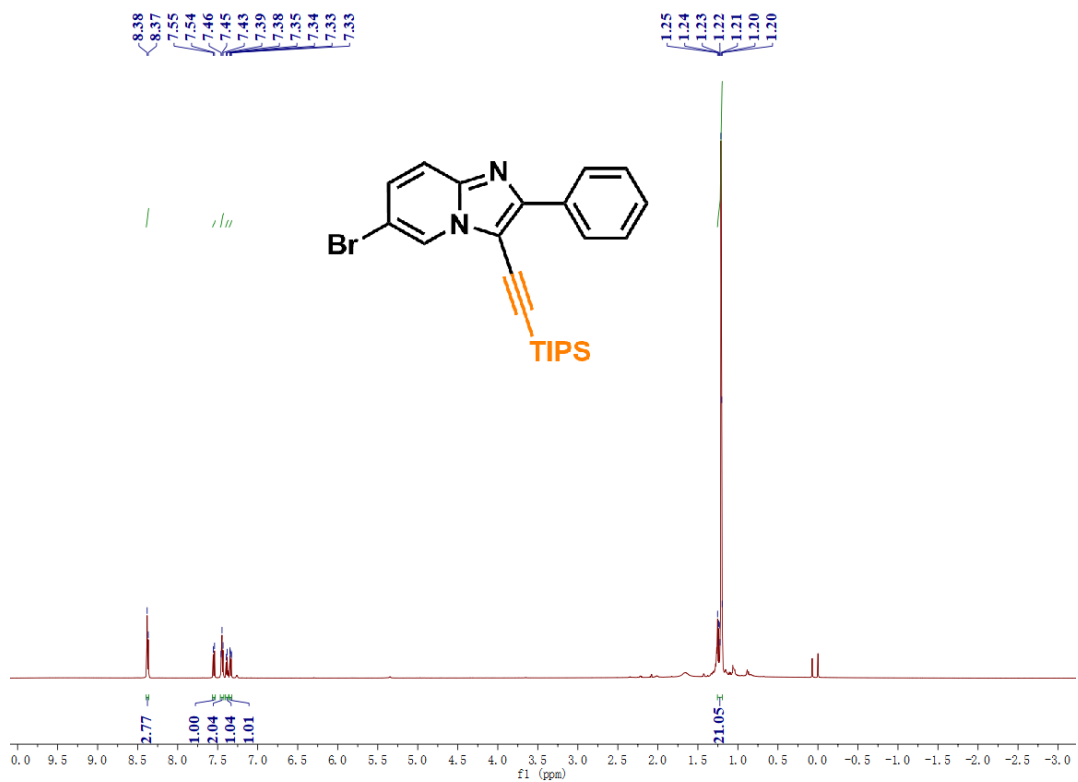

**3pa** |  $^{13}\text{C}\{^1\text{H}\}$  NMR ( $\text{CDCl}_3$ , 151 MHz)

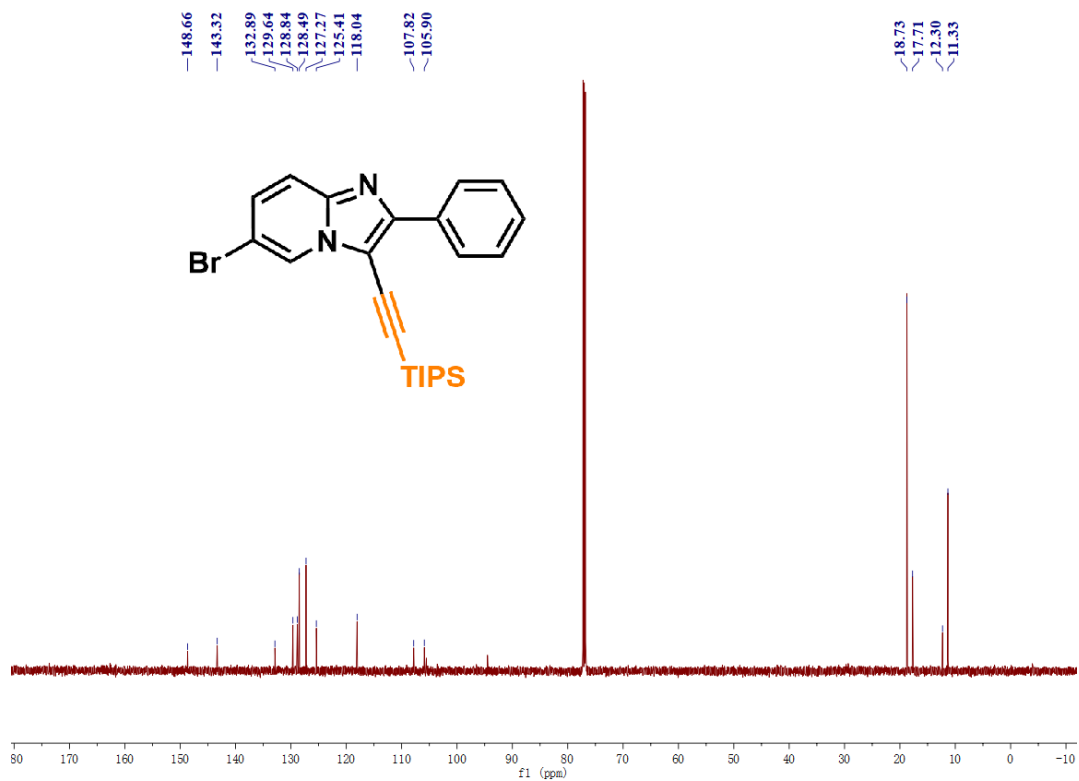

**3qa** |  $^1\text{H}$  NMR ( $\text{CDCl}_3$ , 600 MHz)

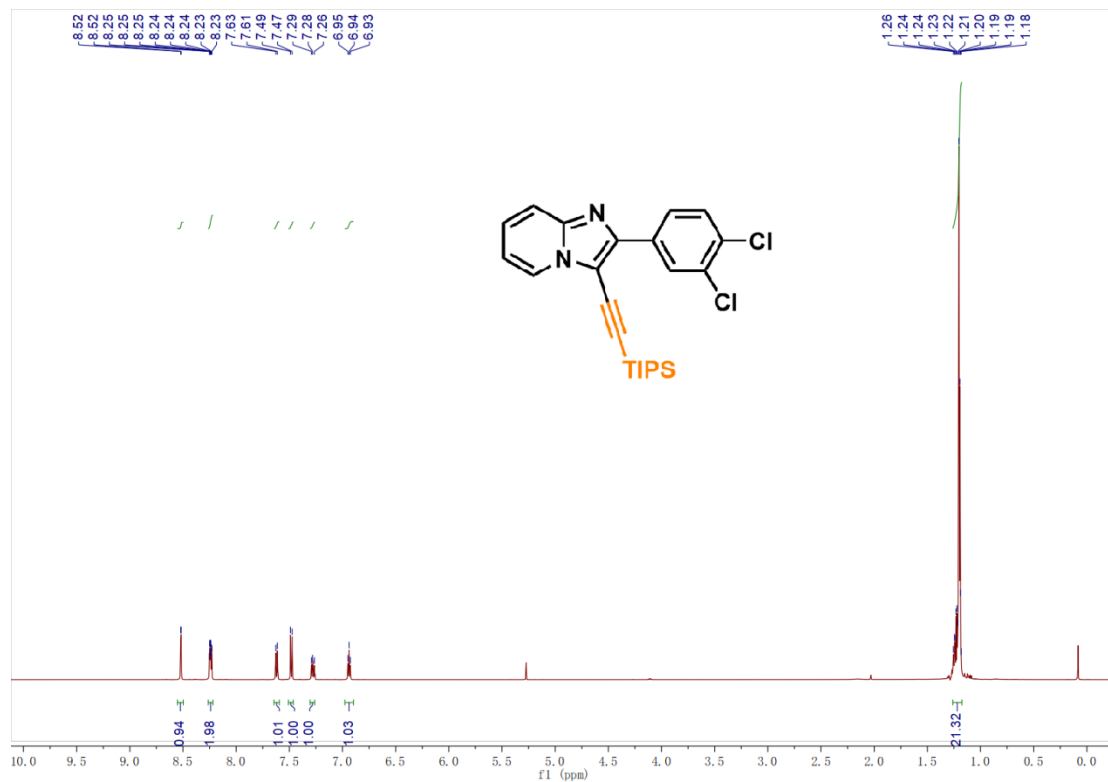

**3qa** |  $^{13}\text{C}\{^1\text{H}\}$  NMR ( $\text{CDCl}_3$ , 151 MHz)

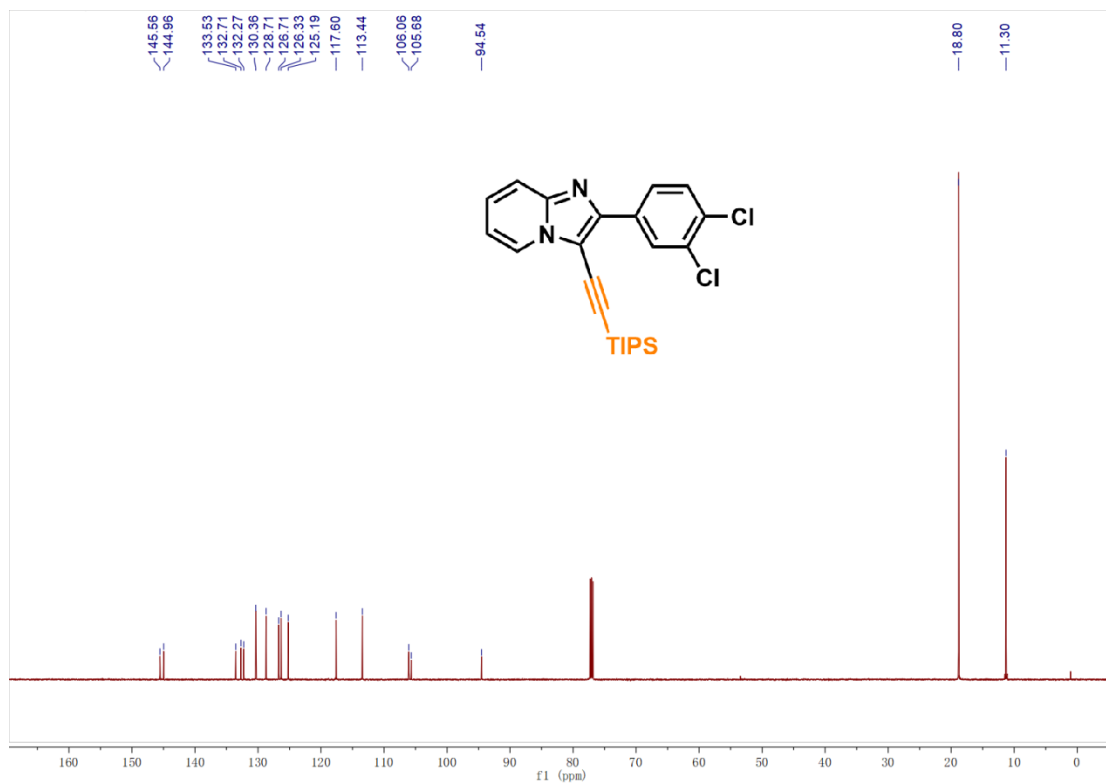

**3ra** |  $^1\text{H}$  NMR ( $\text{CDCl}_3$ , 600 MHz)

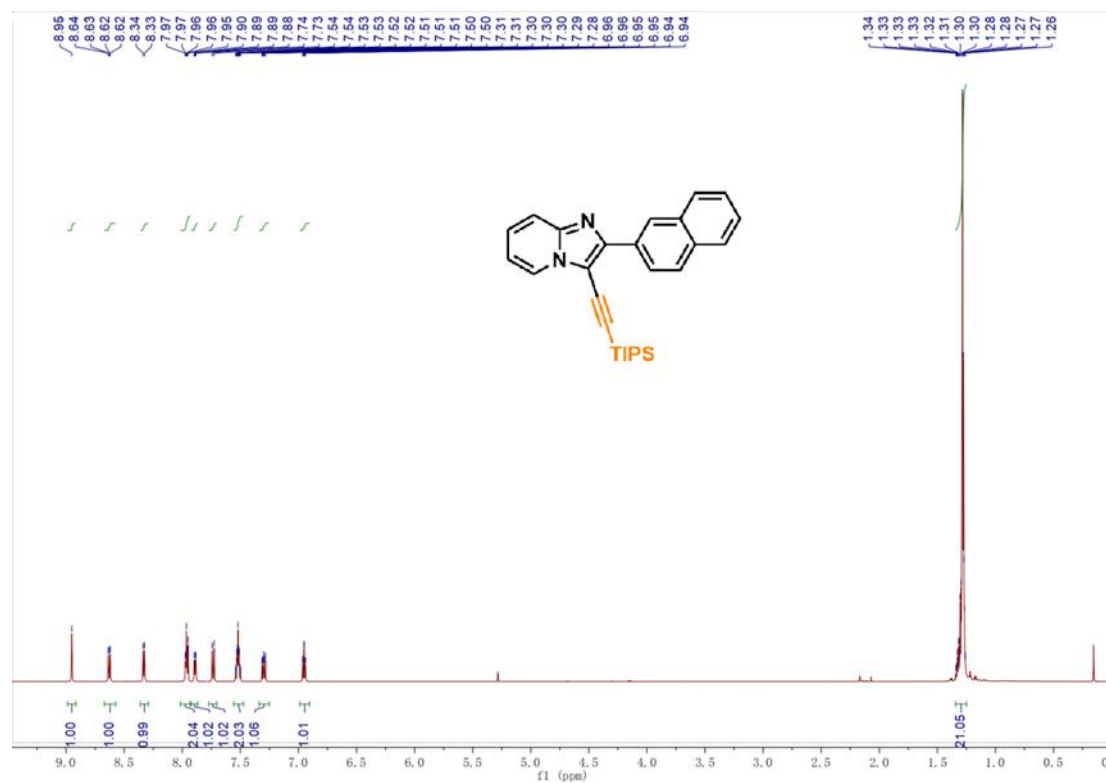

**3ra** |  $^{13}\text{C}\{^1\text{H}\}$  NMR ( $\text{CDCl}_3$ , 151 MHz)

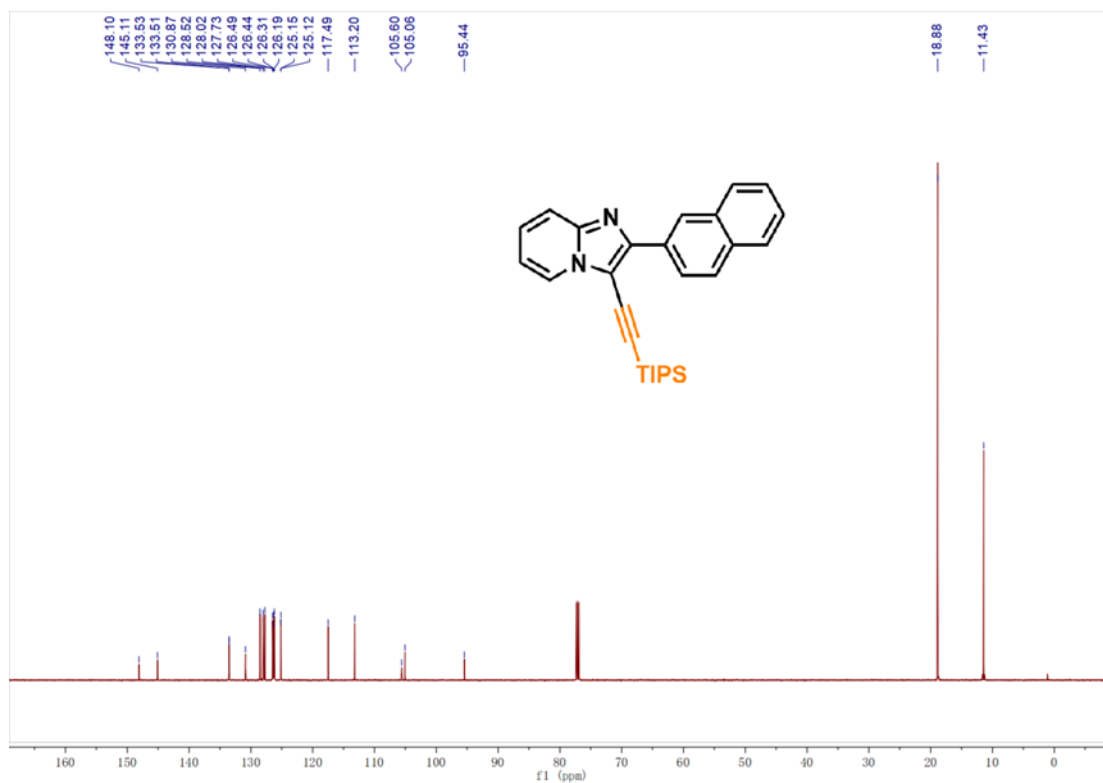

**3ta** |  $^1\text{H}$  NMR ( $\text{CDCl}_3$ , 600 MHz)

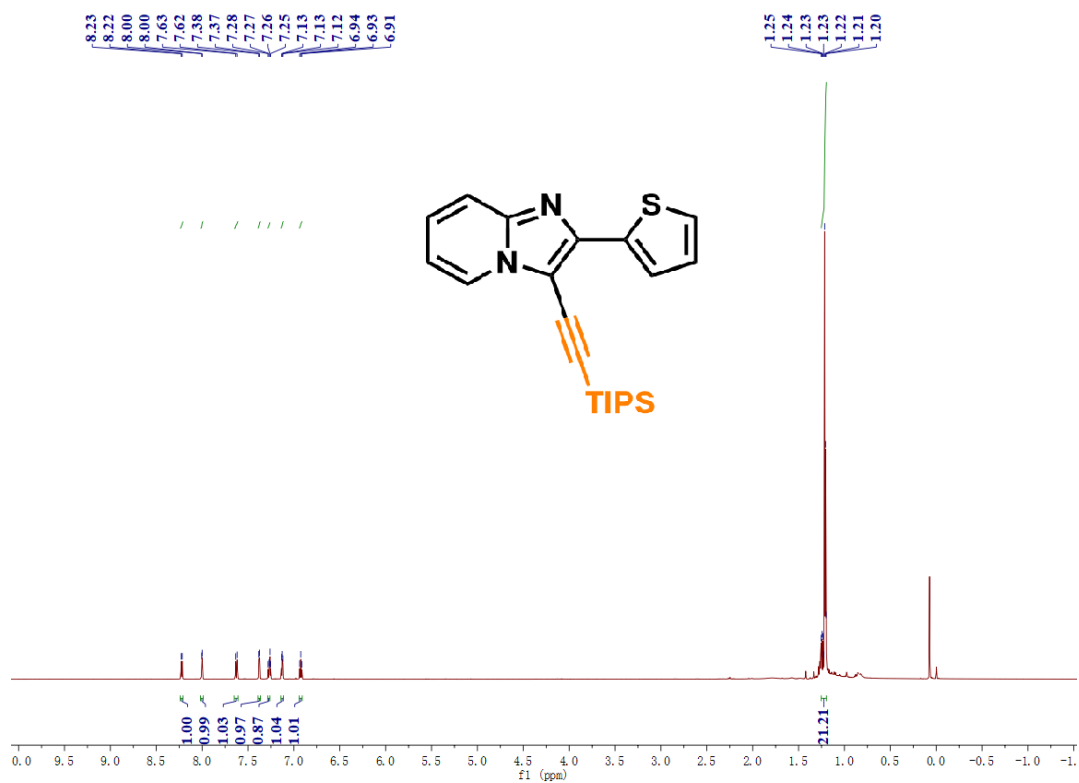

**3ta** |  $^{13}\text{C}\{^1\text{H}\}$  NMR ( $\text{CDCl}_3$ , 151 MHz)

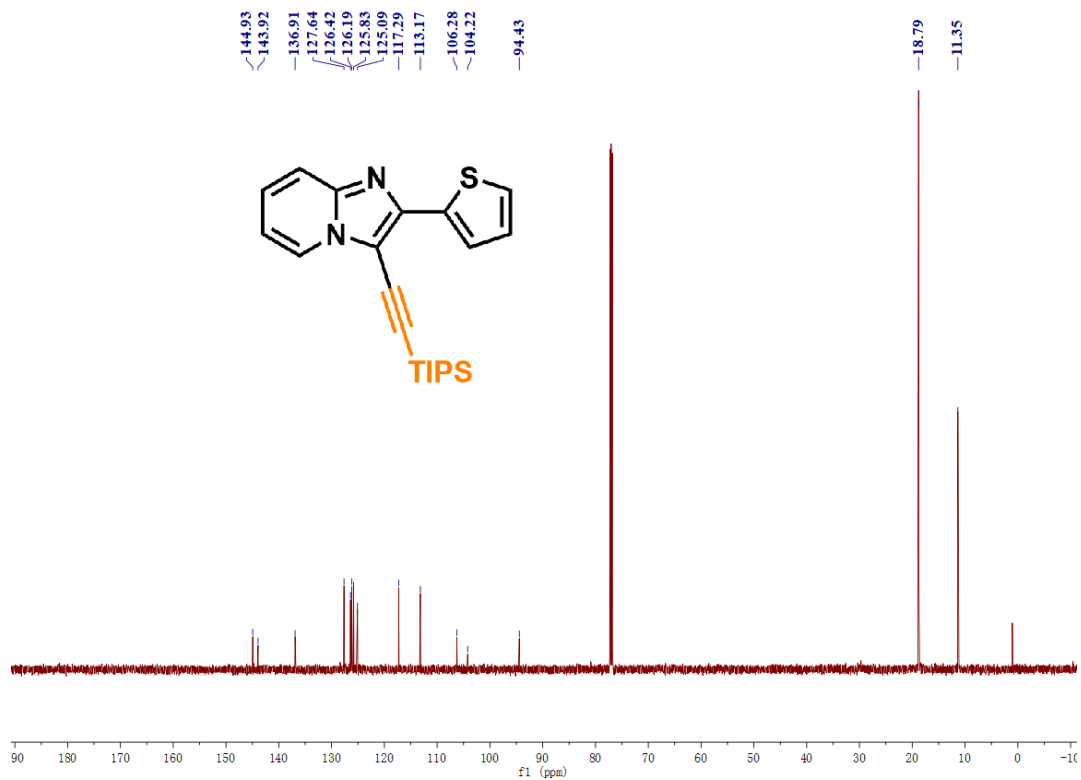

**4aa** |  $^1\text{H}$  NMR ( $\text{CDCl}_3$ , 600 MHz)

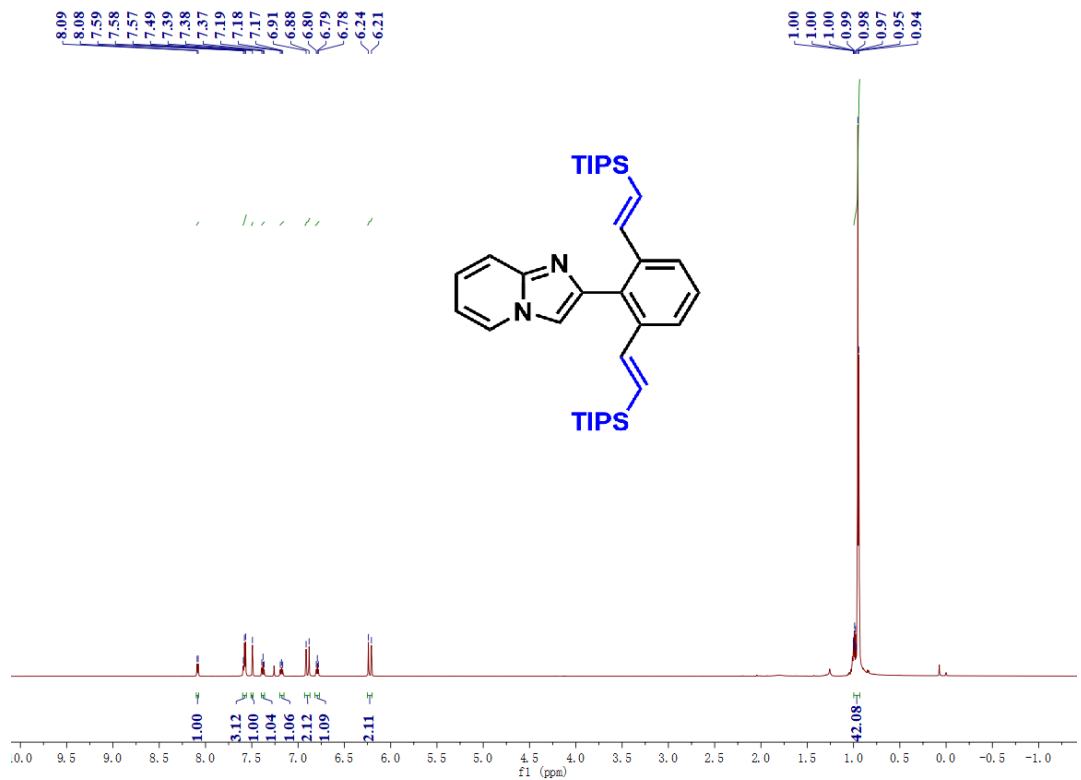

4aa |  $^{13}\text{C}\{^1\text{H}\}$  NMR ( $\text{CDCl}_3$ , 151 MHz)

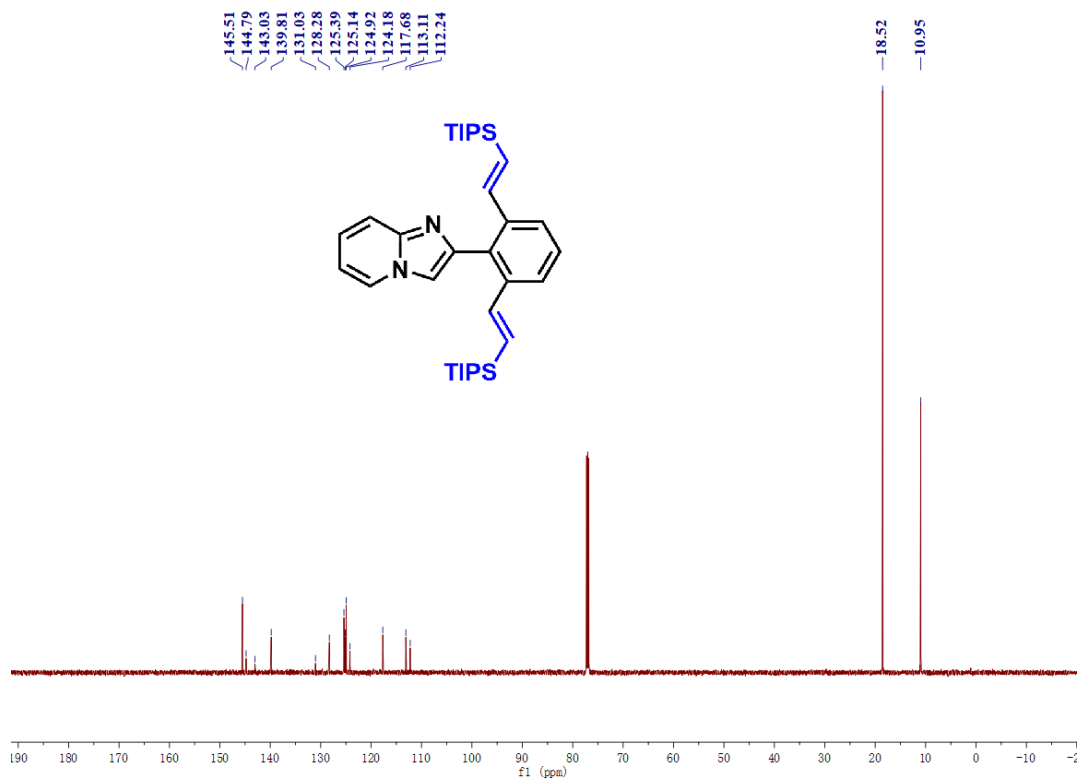

4aa<sub>1</sub> |  $^1\text{H}$  NMR ( $\text{CDCl}_3$ , 600 MHz)

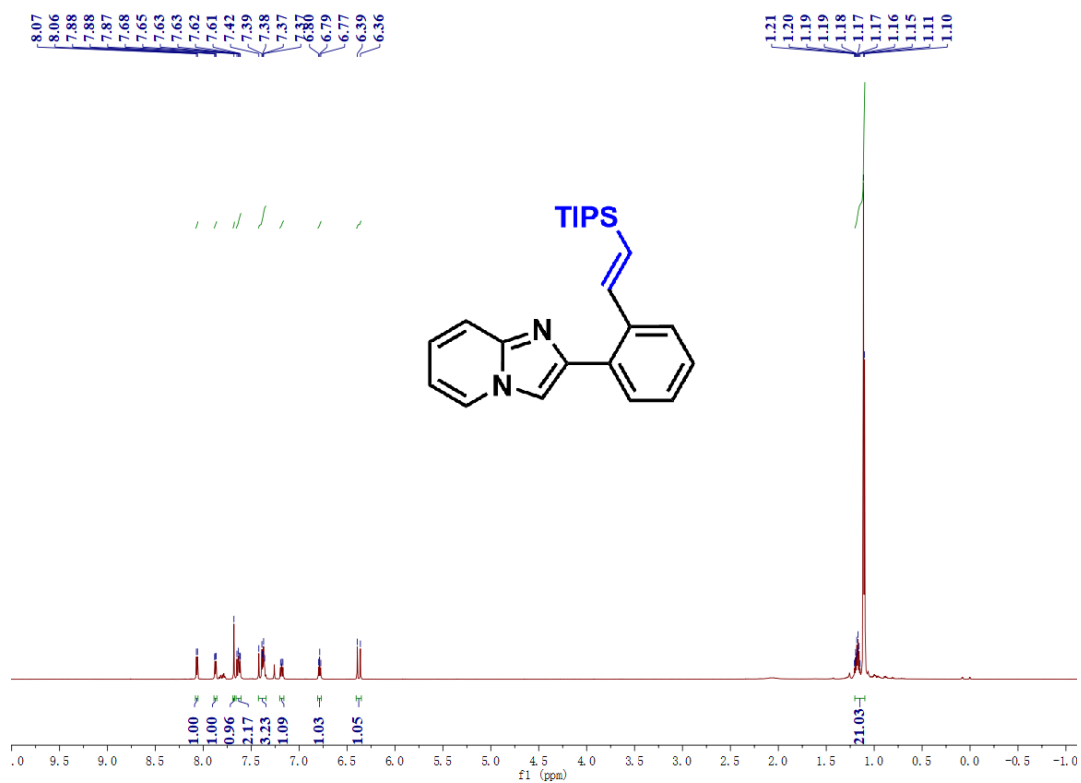

4aa<sub>1</sub> | <sup>13</sup>C{<sup>1</sup>H} NMR (CDCl<sub>3</sub>, 151 MHz)

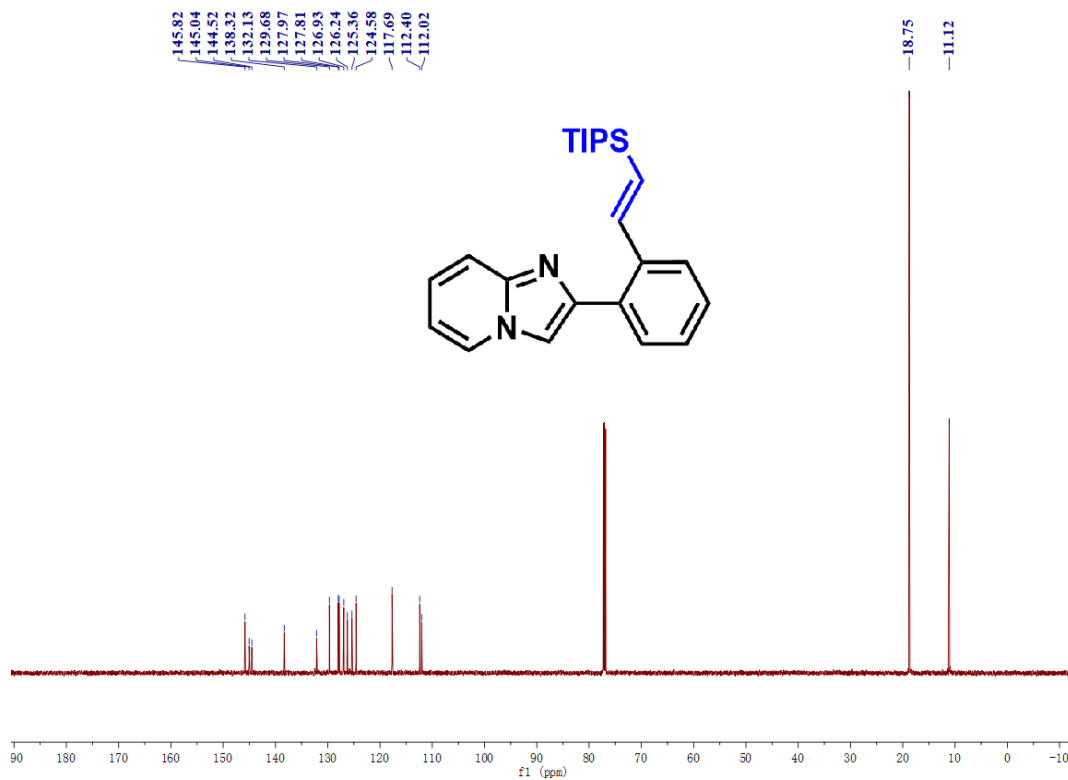

4ba | <sup>1</sup>H NMR (CDCl<sub>3</sub>, 600 MHz)

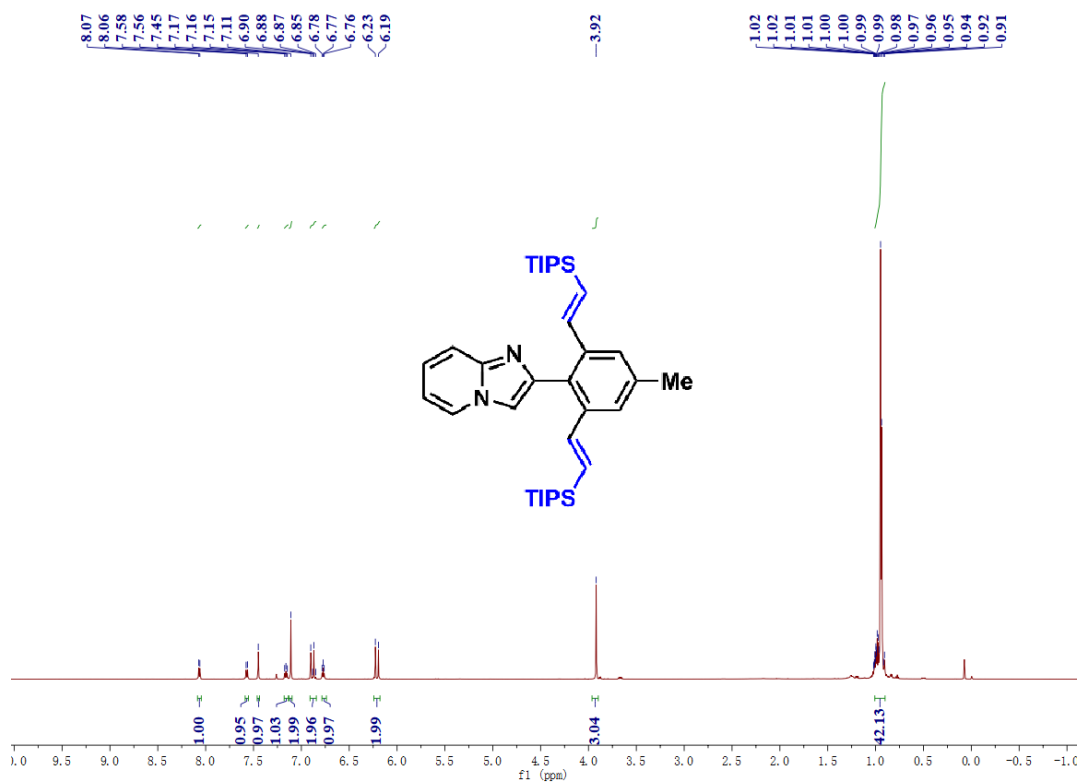

**4ba** |  $^{13}\text{C}\{^1\text{H}\}$  NMR ( $\text{CDCl}_3$ , 151 MHz)

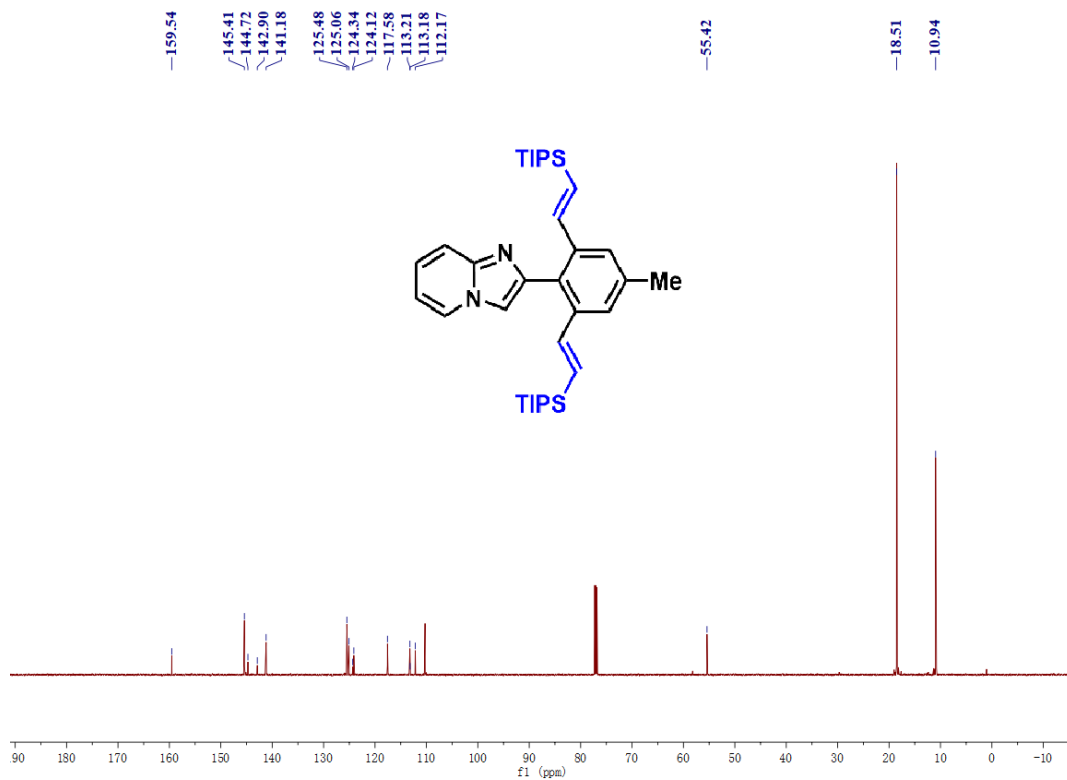

**4ba<sub>1</sub>** |  $^1\text{H}$  NMR ( $\text{CDCl}_3$ , 600 MHz)

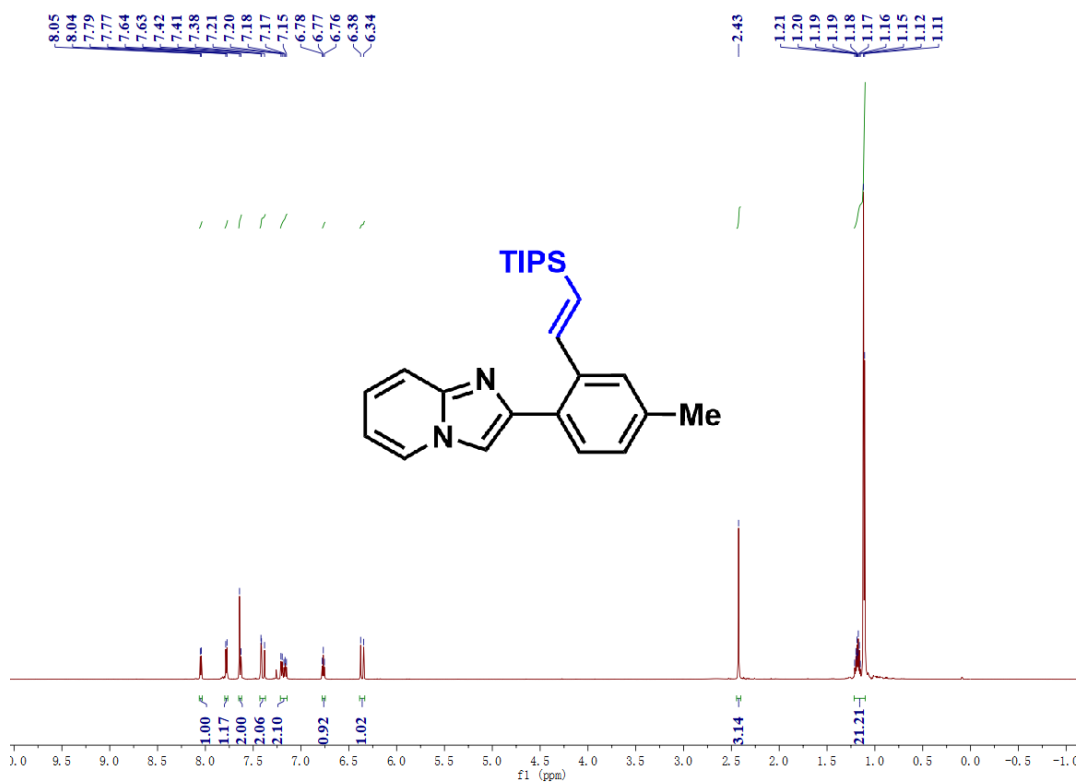

**4ba<sub>1</sub>** | <sup>13</sup>C{<sup>1</sup>H} NMR (CDCl<sub>3</sub>, 151 MHz)

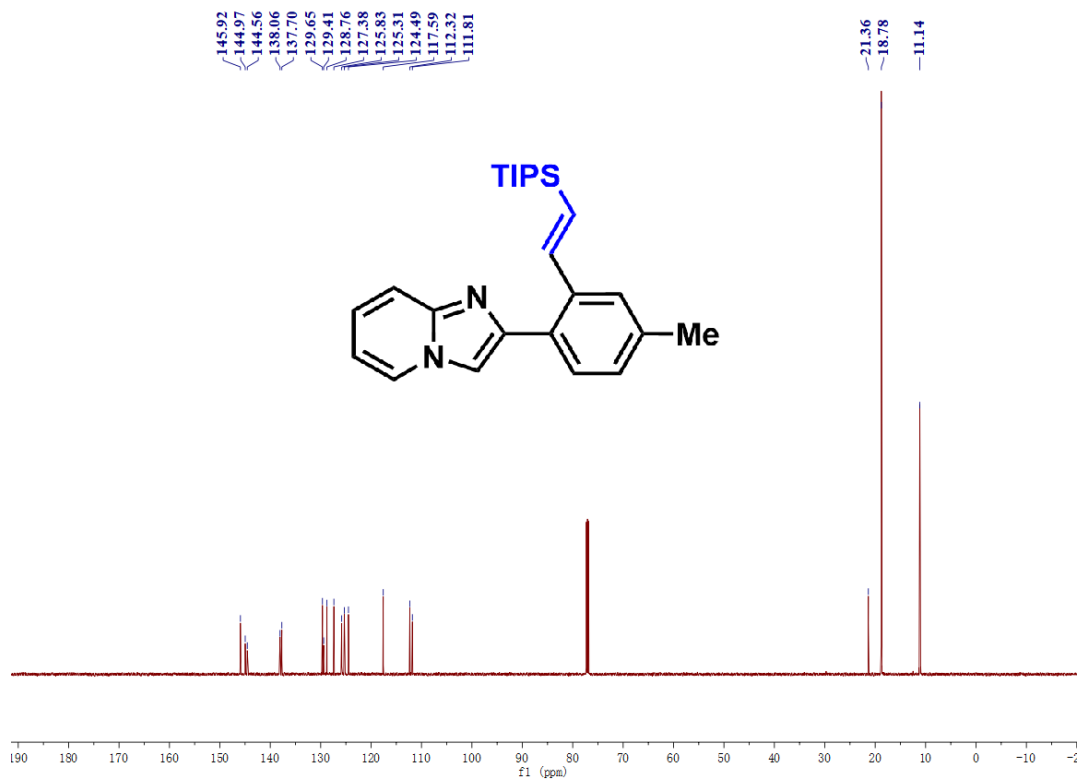

**4ca** | <sup>1</sup>H NMR (CDCl<sub>3</sub>, 600 MHz)

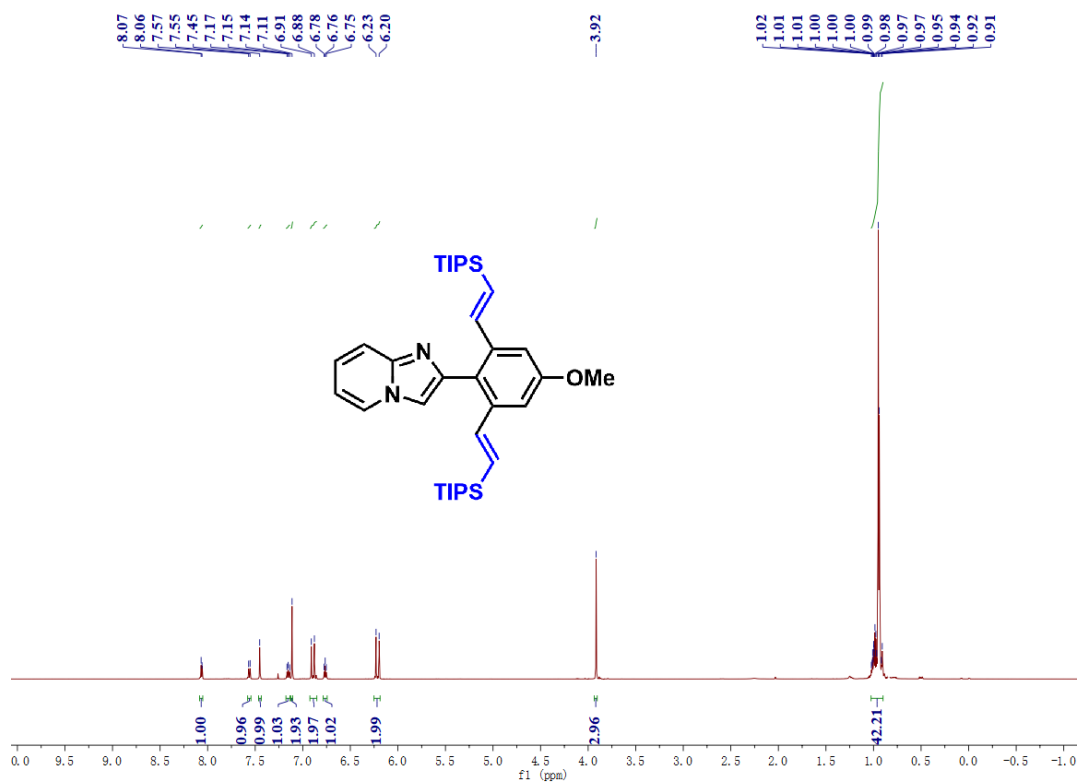

**4ca** |  $^{13}\text{C}\{^1\text{H}\}$  NMR ( $\text{CDCl}_3$ , 151 MHz)

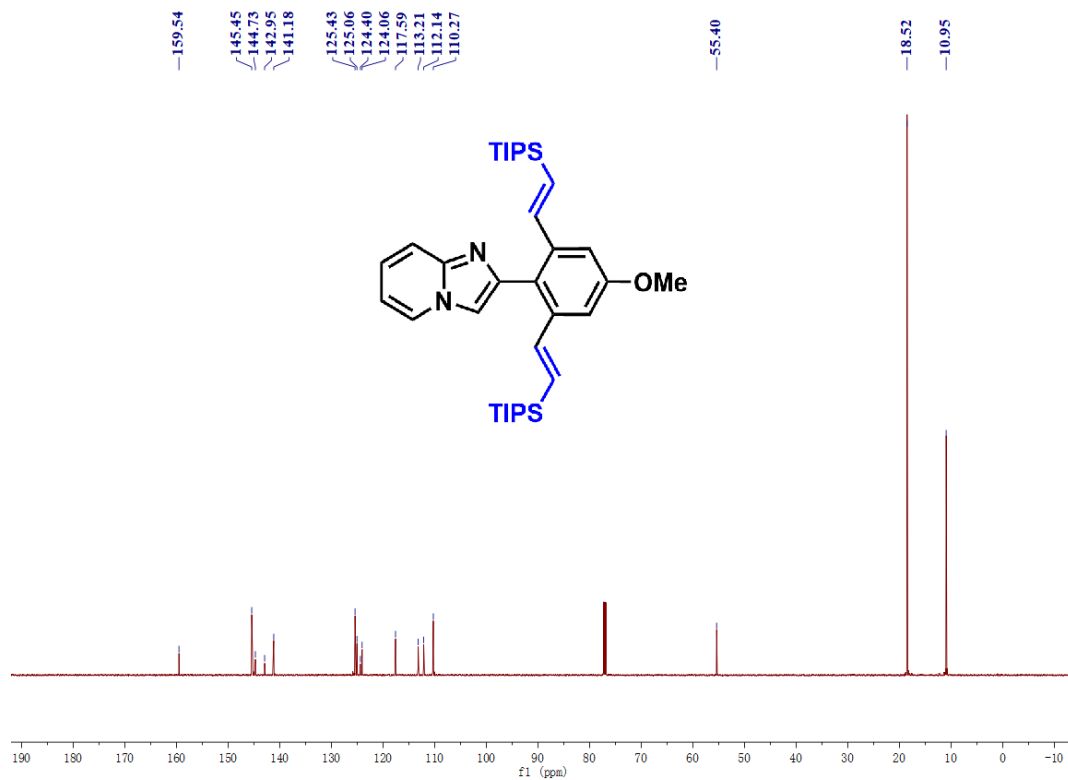

**4da** |  $^1\text{H}$  NMR ( $\text{CDCl}_3$ , 600 MHz)

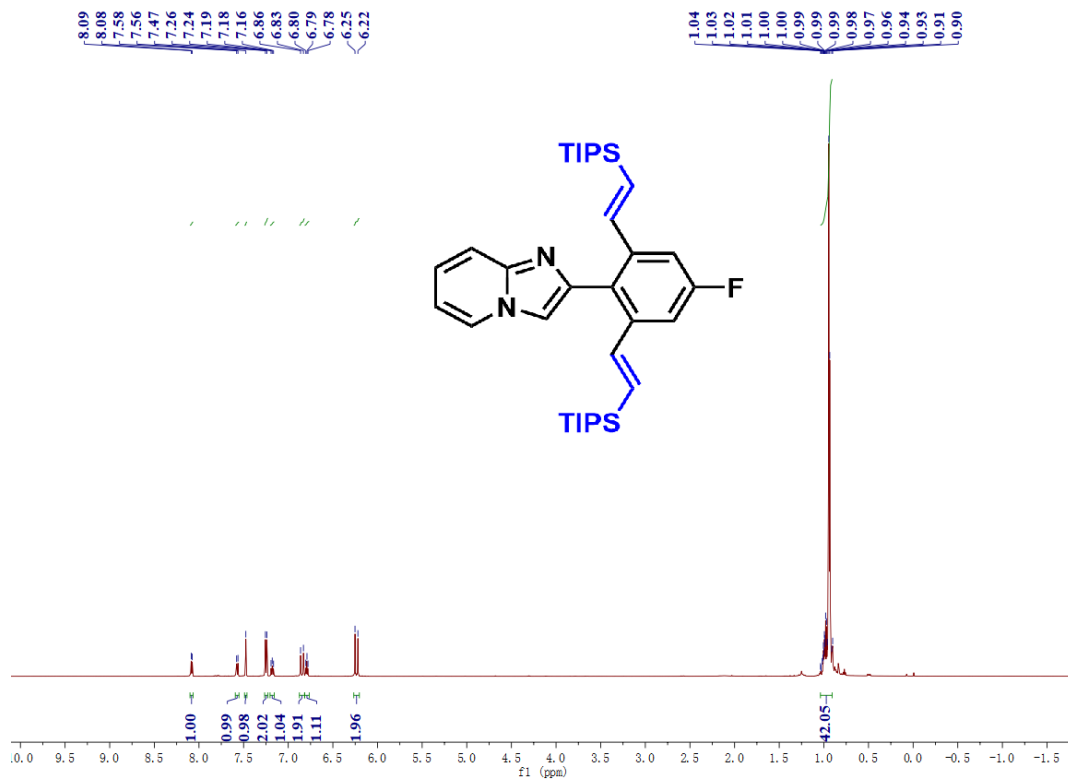

**4da** |  $^{13}\text{C}\{^1\text{H}\}$  NMR ( $\text{CDCl}_3$ , 151 MHz)

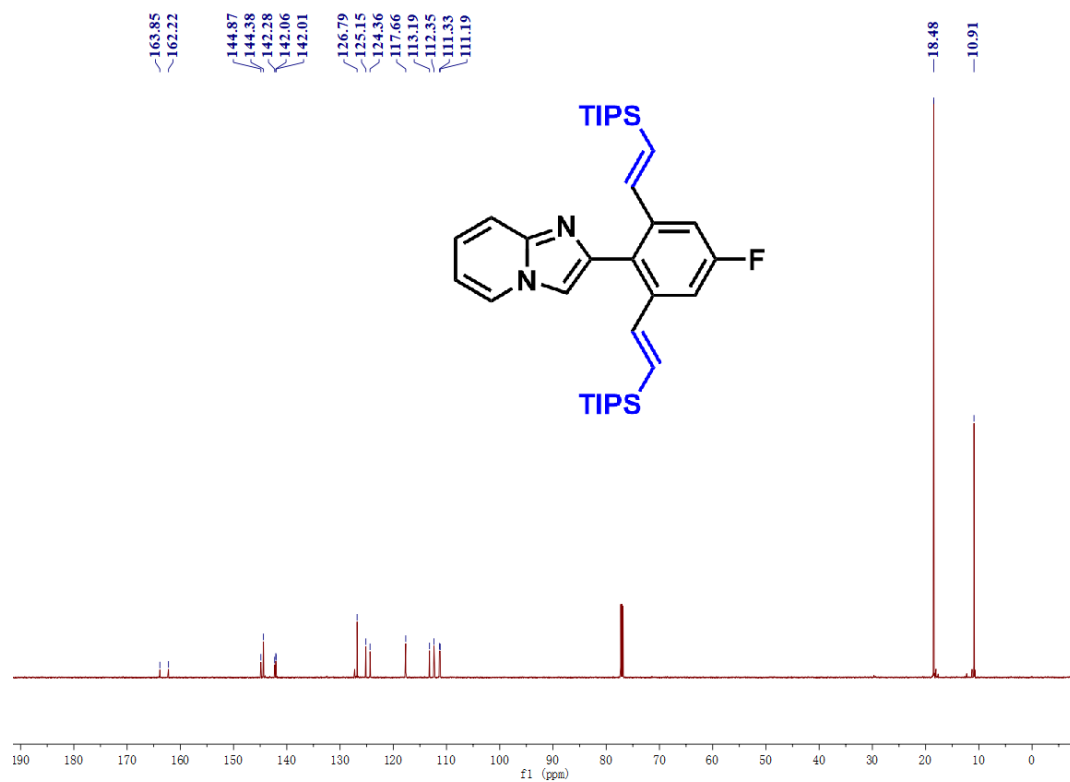

**4da** |  $^{19}\text{F}\{^1\text{H}\}$  NMR ( $\text{CDCl}_3$ , 565 MHz)

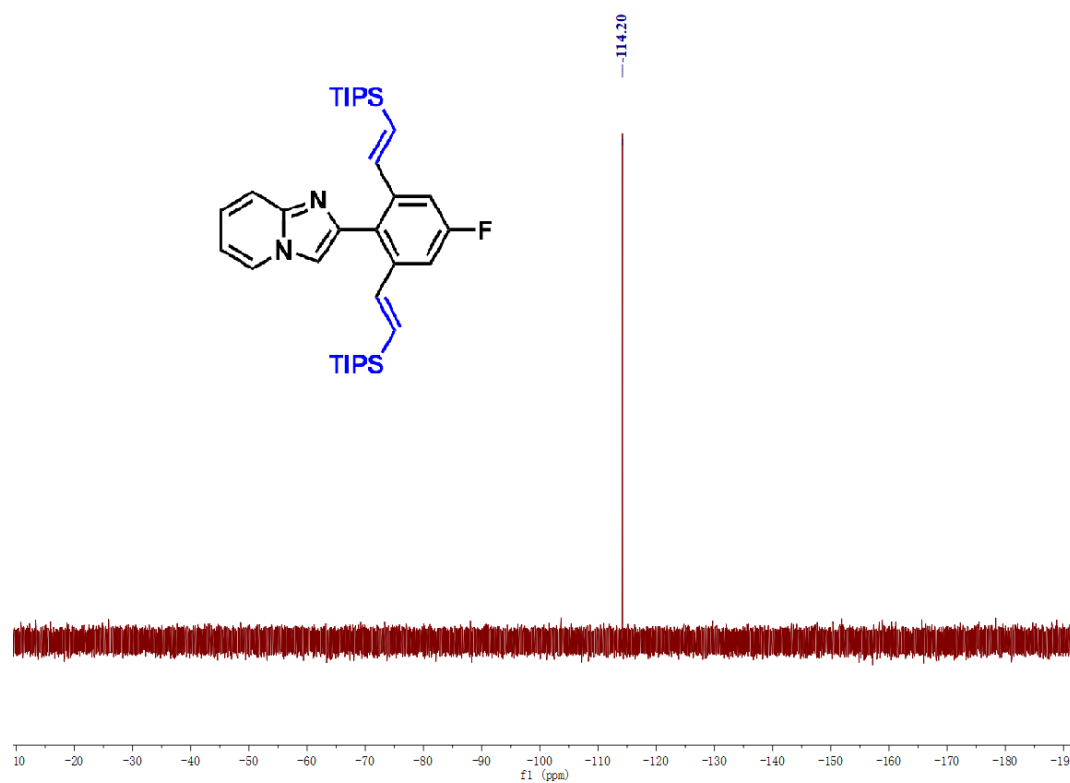

4ea |  $^1\text{H}$  NMR ( $\text{CDCl}_3$ , 600 MHz)

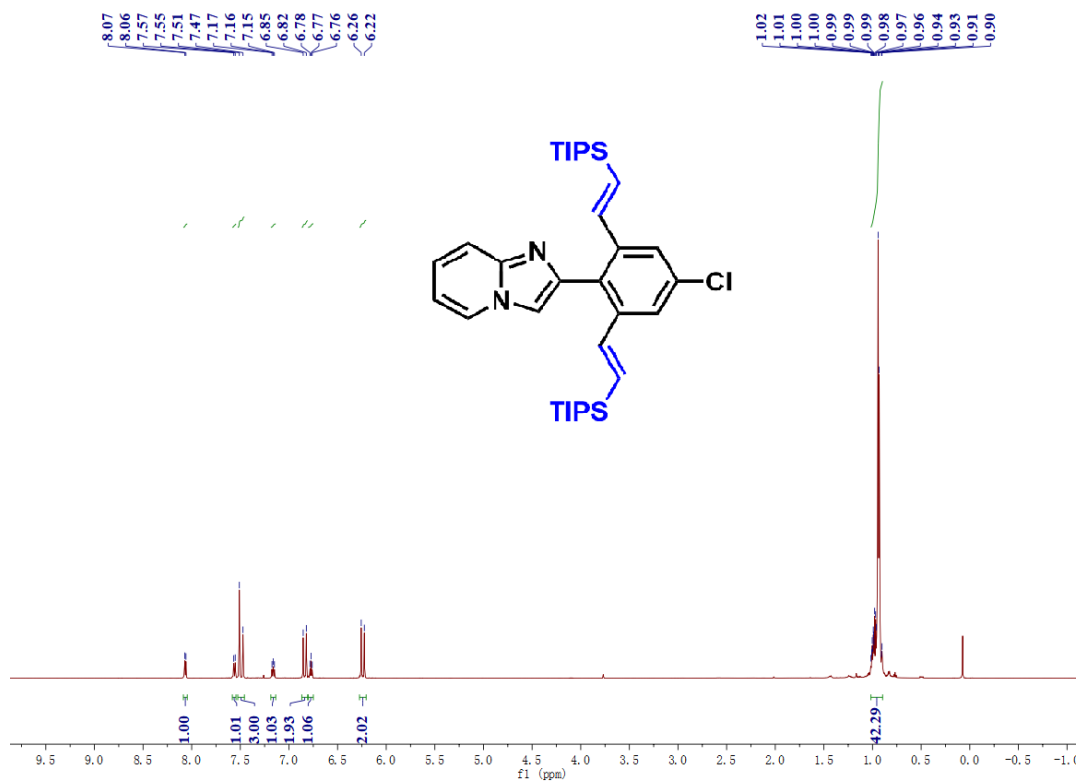

4ea |  $^{13}\text{C}\{^1\text{H}\}$  NMR ( $\text{CDCl}_3$ , 151 MHz)

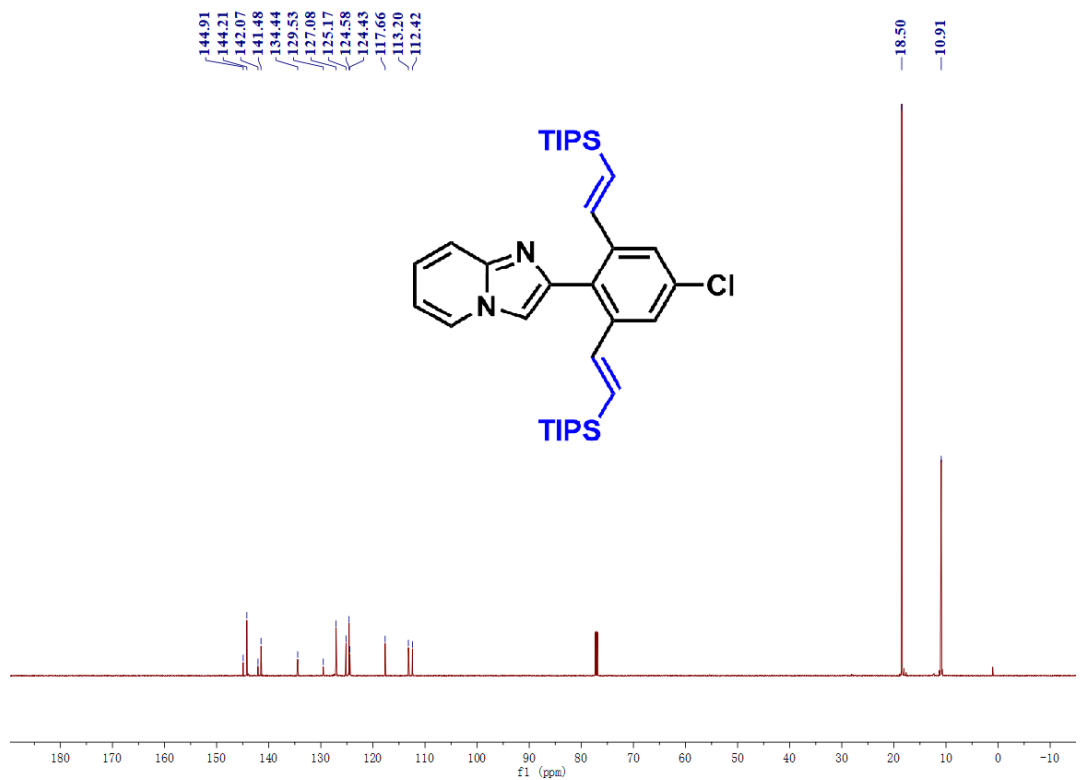

4fa |  $^1\text{H}$  NMR ( $\text{CDCl}_3$ , 600 MHz)

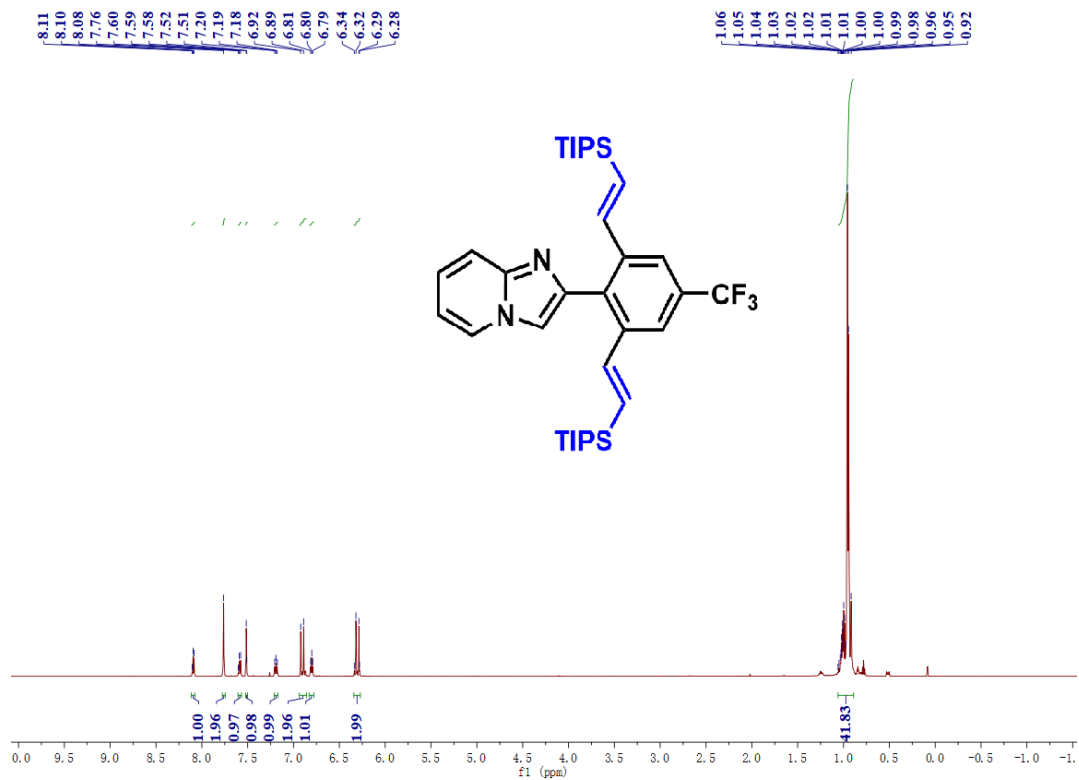

4fa |  $^{13}\text{C}\{^1\text{H}\}$  NMR ( $\text{CDCl}_3$ , 151 MHz)

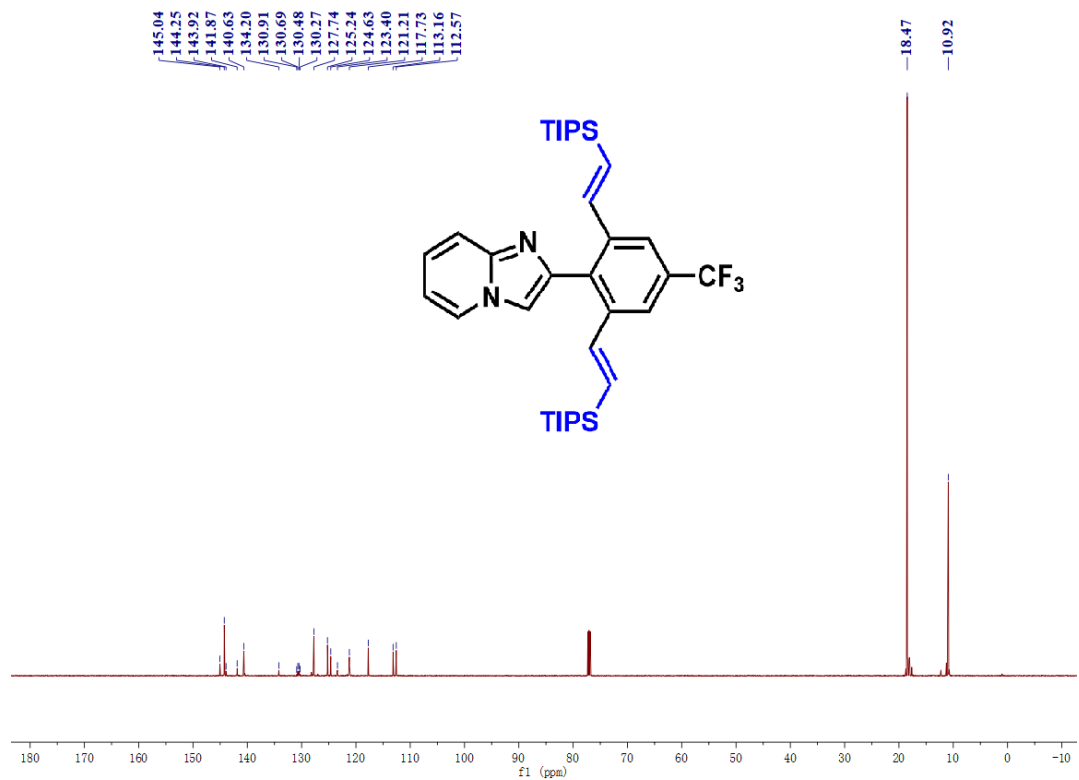

4fa |  $^{19}\text{F}\{^1\text{H}\}$  NMR ( $\text{CDCl}_3$ , 565 MHz)

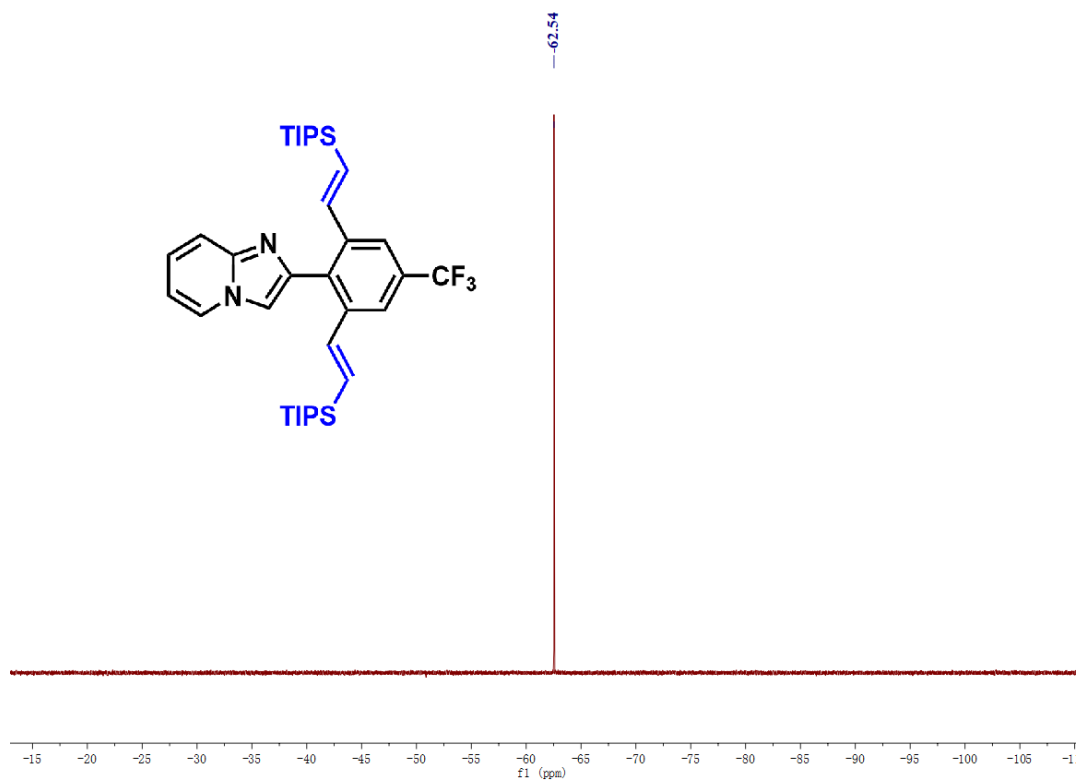

4ga |  $^1\text{H}$  NMR ( $\text{CDCl}_3$ , 600 MHz)

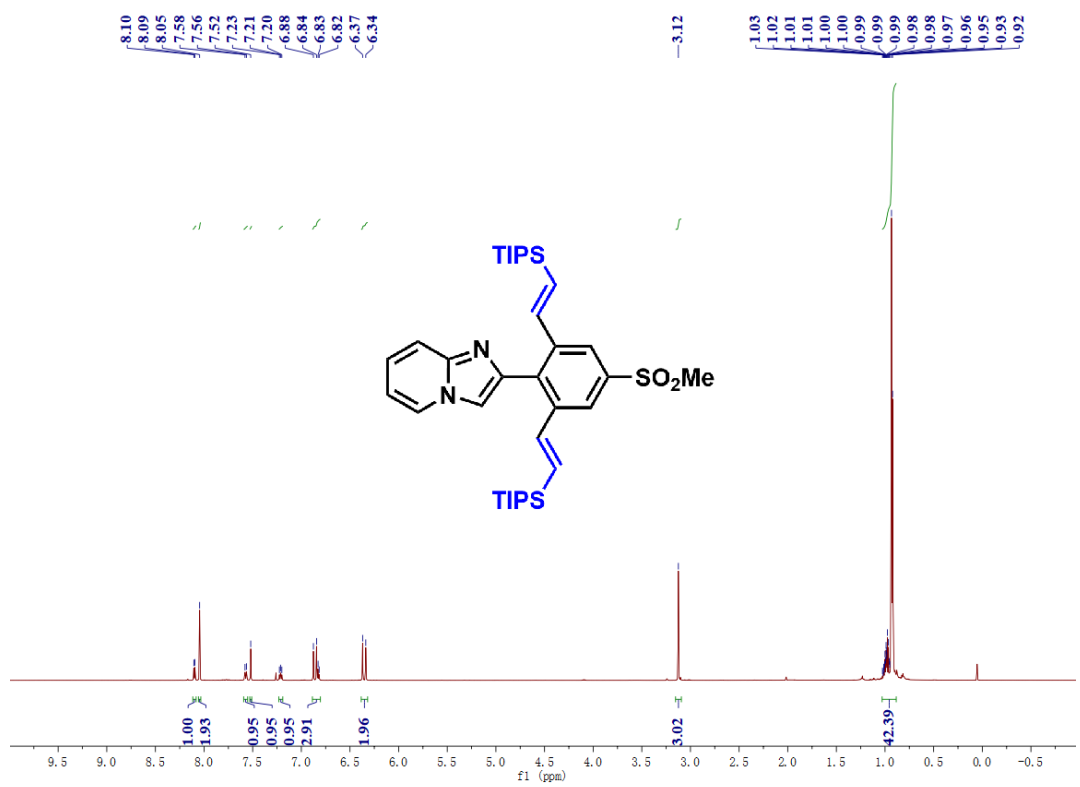

**4ga** |  $^{13}\text{C}\{^1\text{H}\}$  NMR ( $\text{CDCl}_3$ , 151 MHz)

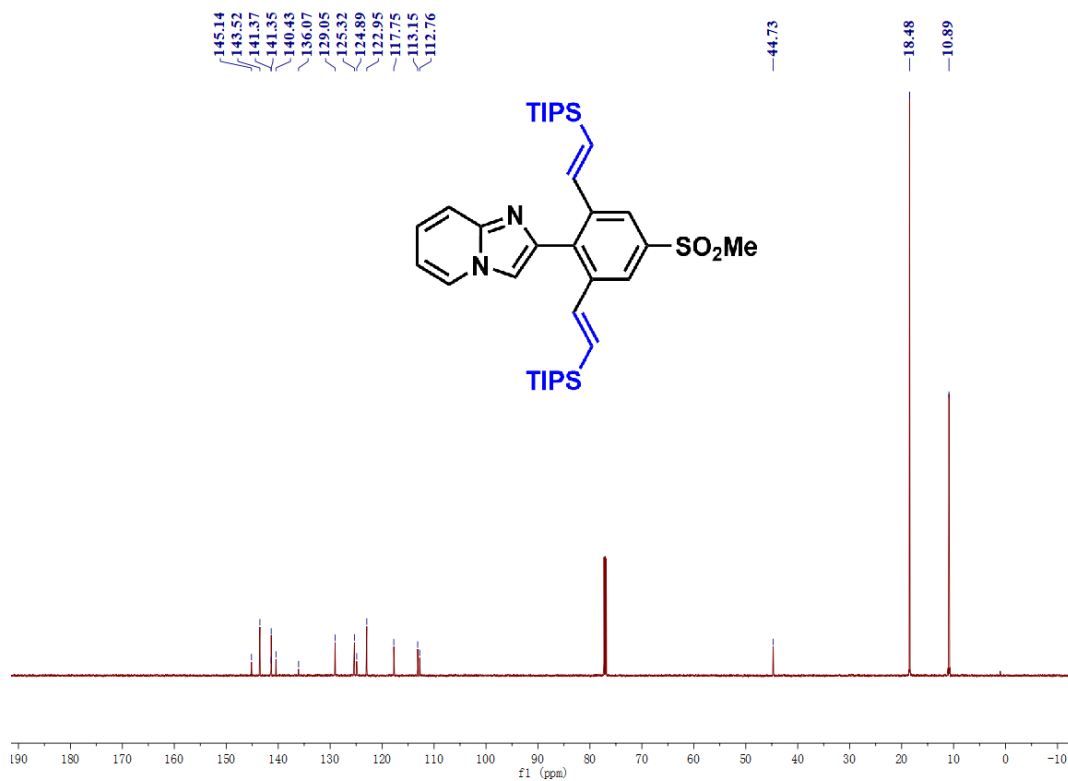

**4ja** |  $^1\text{H}$  NMR ( $\text{CDCl}_3$ , 600 MHz)

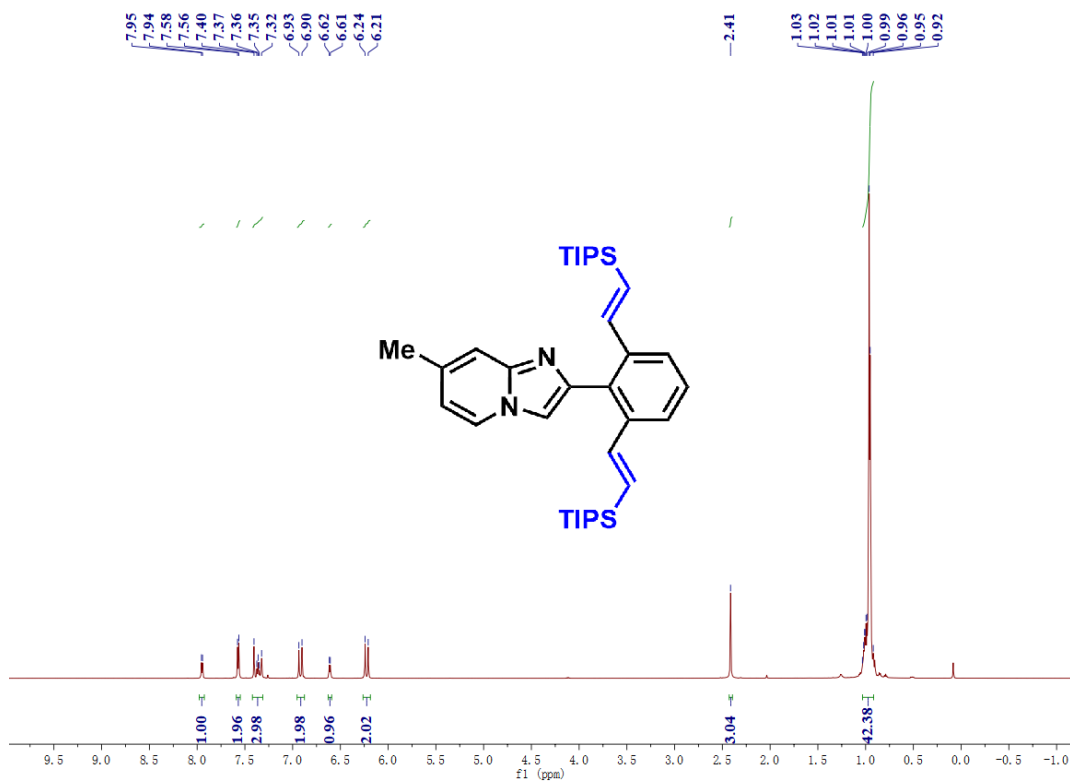

4ja |  $^{13}\text{C}\{^1\text{H}\}$  NMR ( $\text{CDCl}_3$ , 151 MHz)

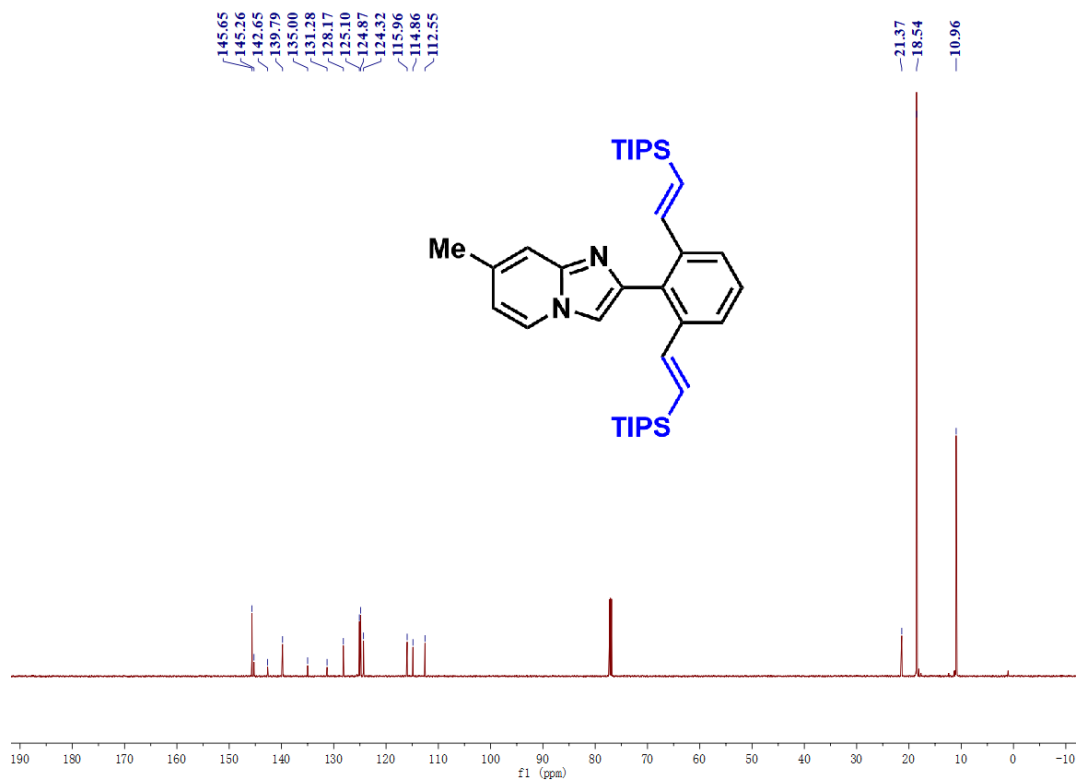

4ka |  $^1\text{H}$  NMR ( $\text{CDCl}_3$ , 600 MHz)

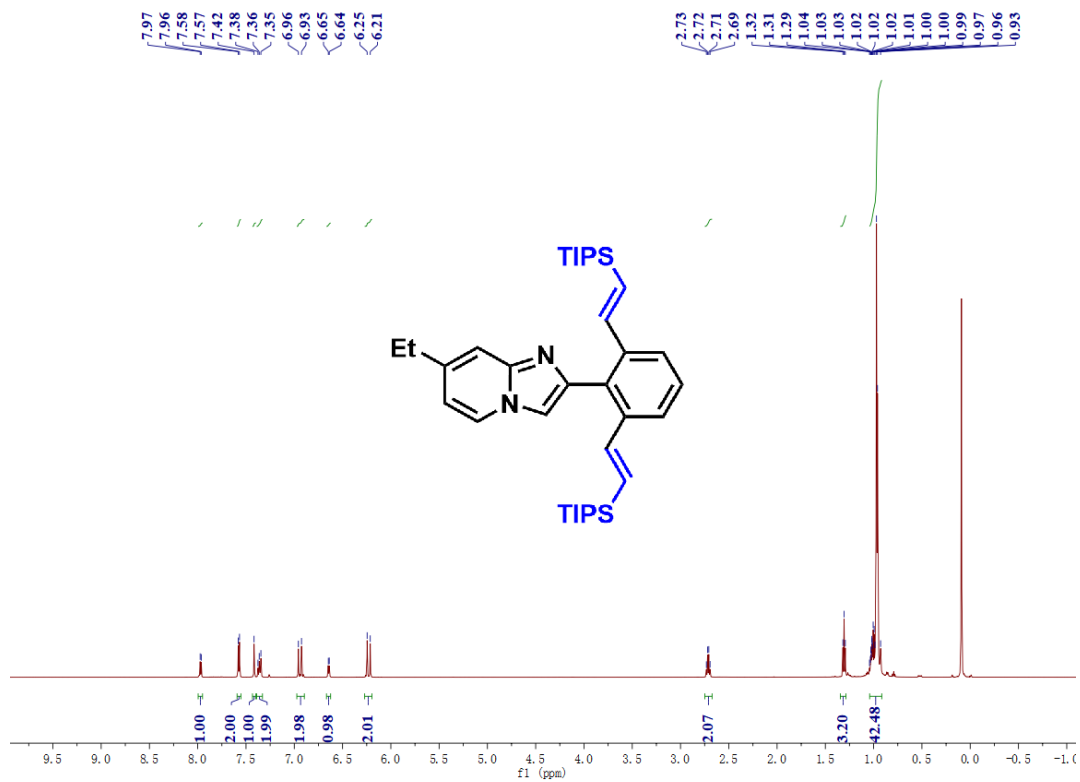

4ka |  $^{13}\text{C}\{^1\text{H}\}$  NMR ( $\text{CDCl}_3$ , 151 MHz)

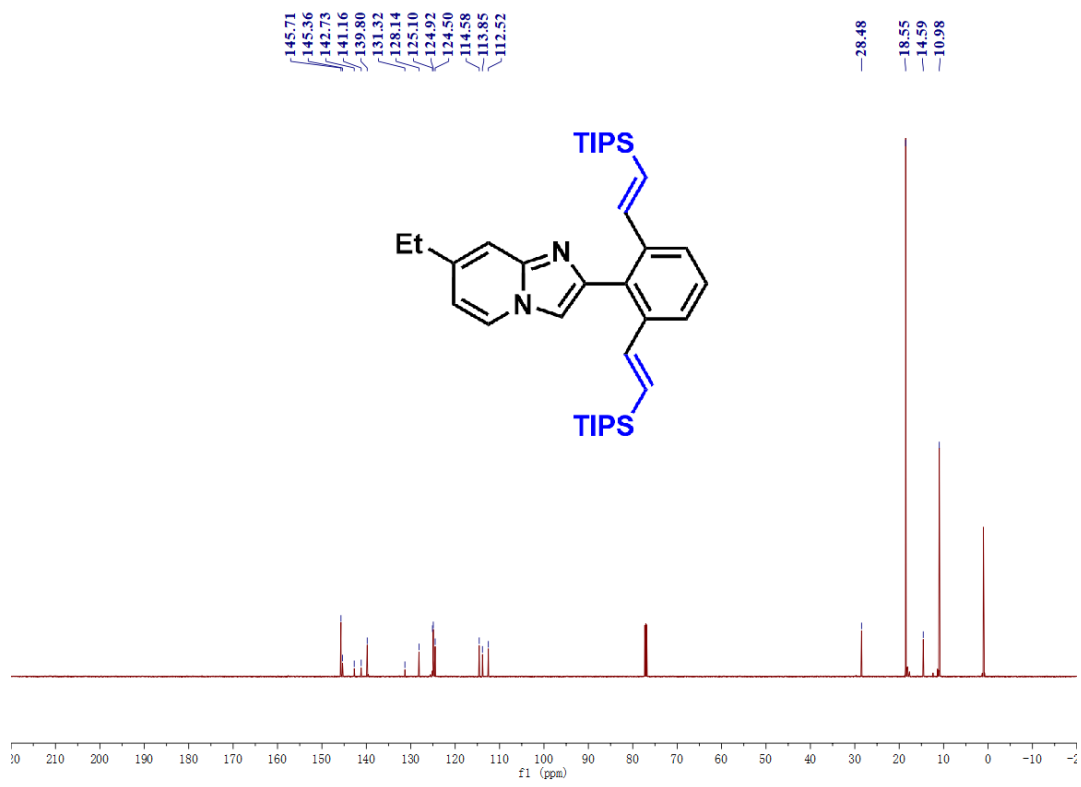

4la |  $^1\text{H}$  NMR ( $\text{CDCl}_3$ , 600 MHz)

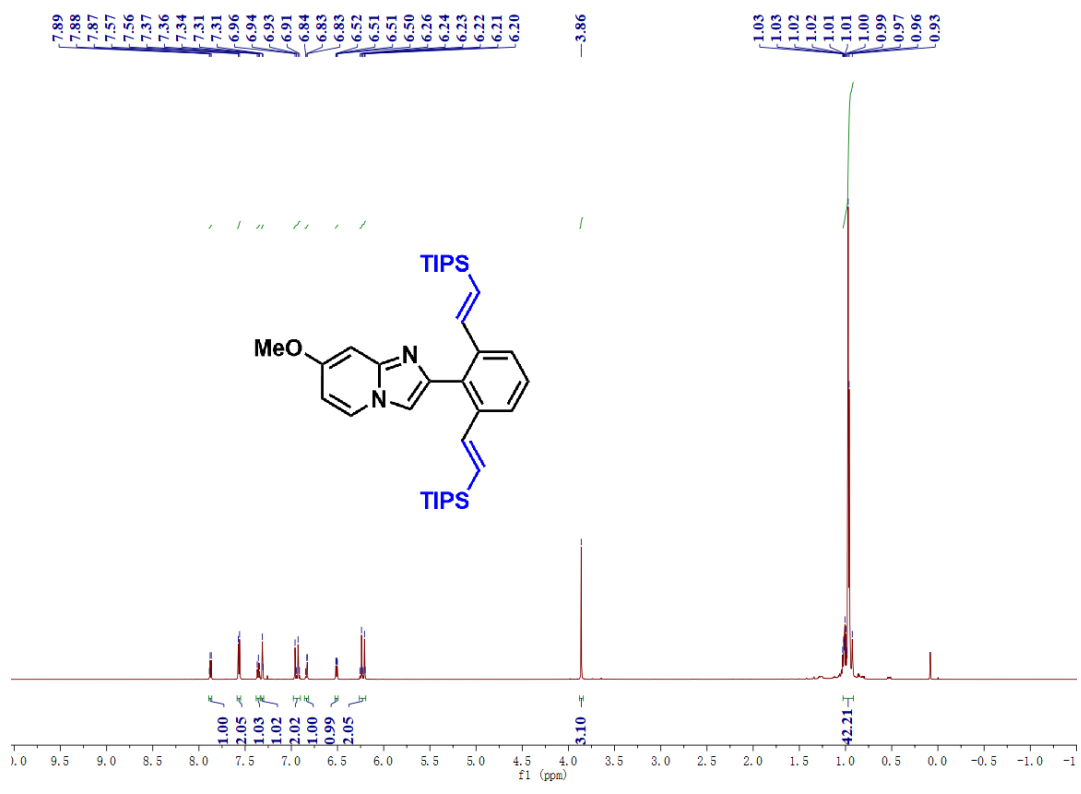

**4la** |  $^{13}\text{C}\{^1\text{H}\}$  NMR ( $\text{CDCl}_3$ , 151 MHz)

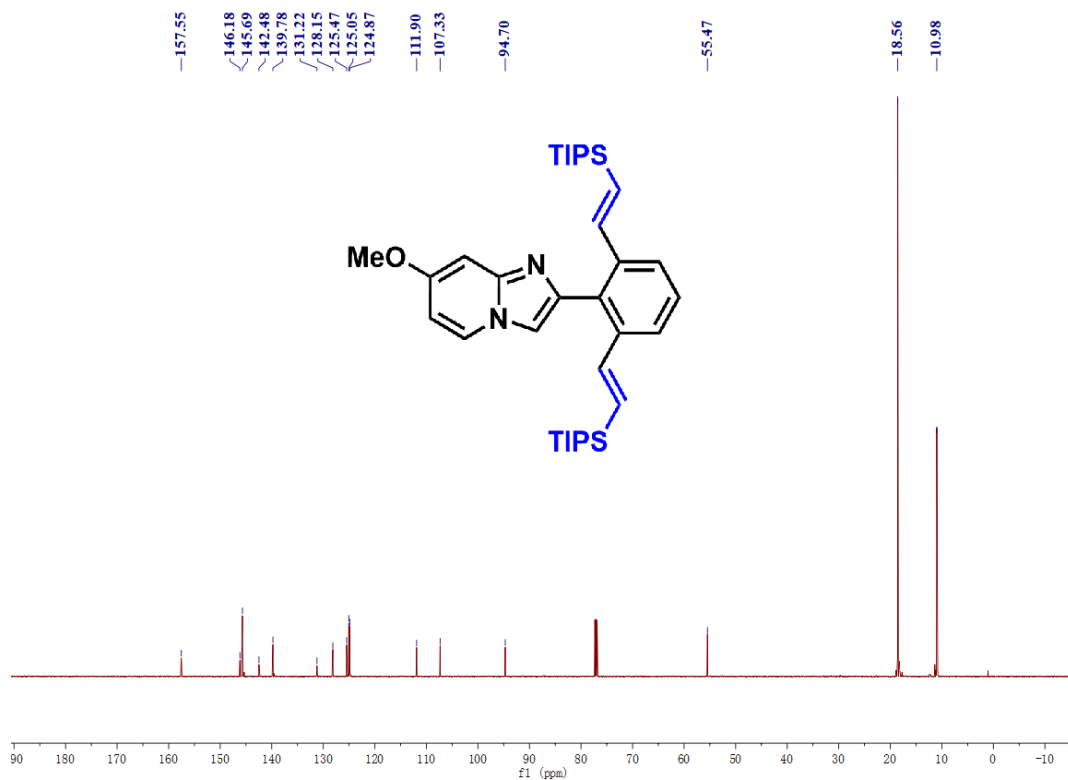

**4ma** |  $^1\text{H}$  NMR ( $\text{CDCl}_3$ , 600 MHz)

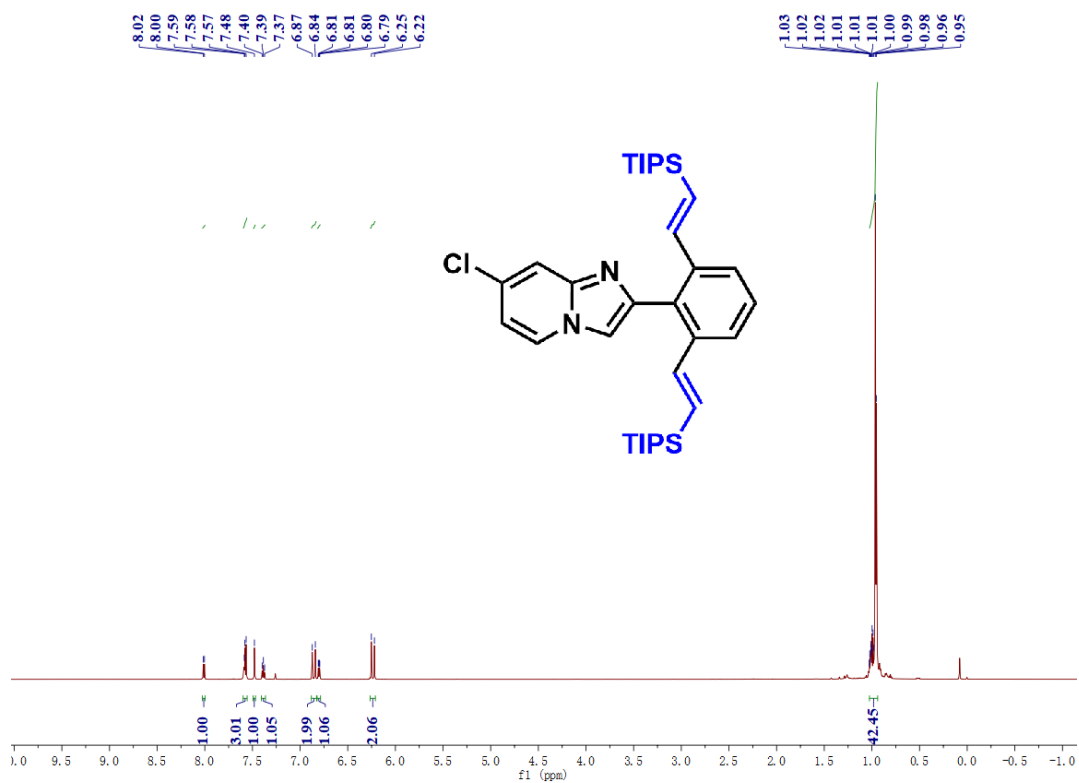

4ma |  $^{13}\text{C}\{^1\text{H}\}$  NMR ( $\text{CDCl}_3$ , 151 MHz)

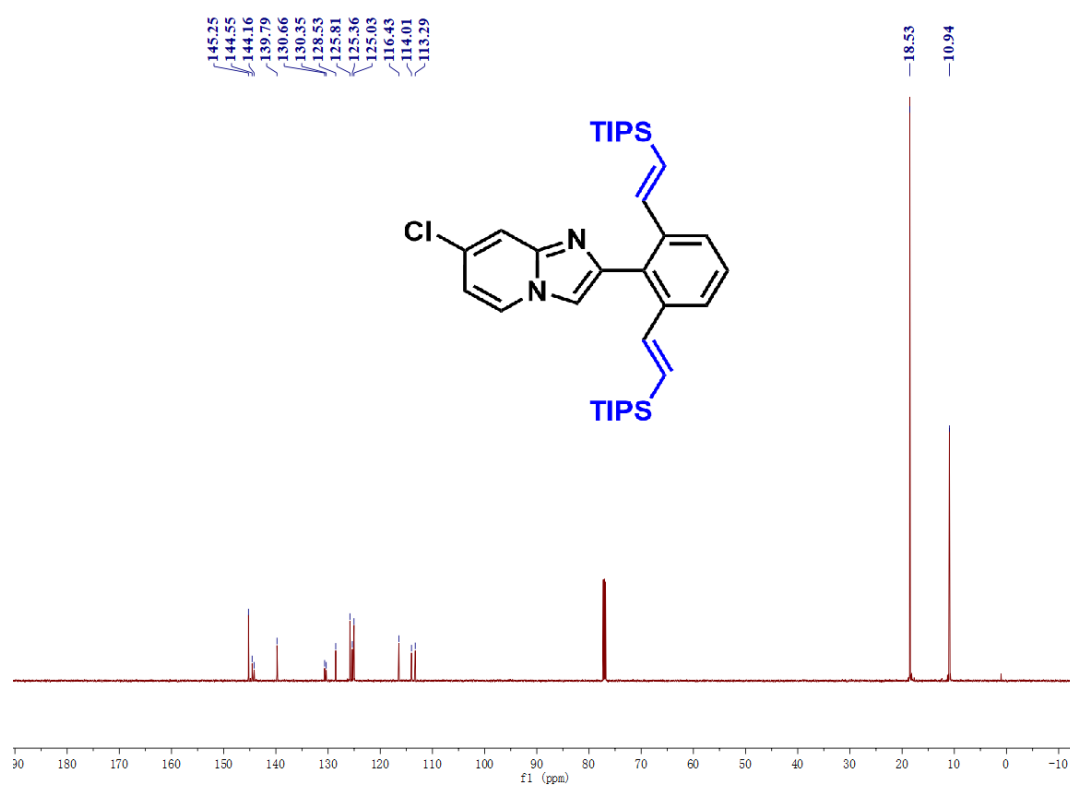

4na |  $^1\text{H}$  NMR ( $\text{CDCl}_3$ , 600 MHz)

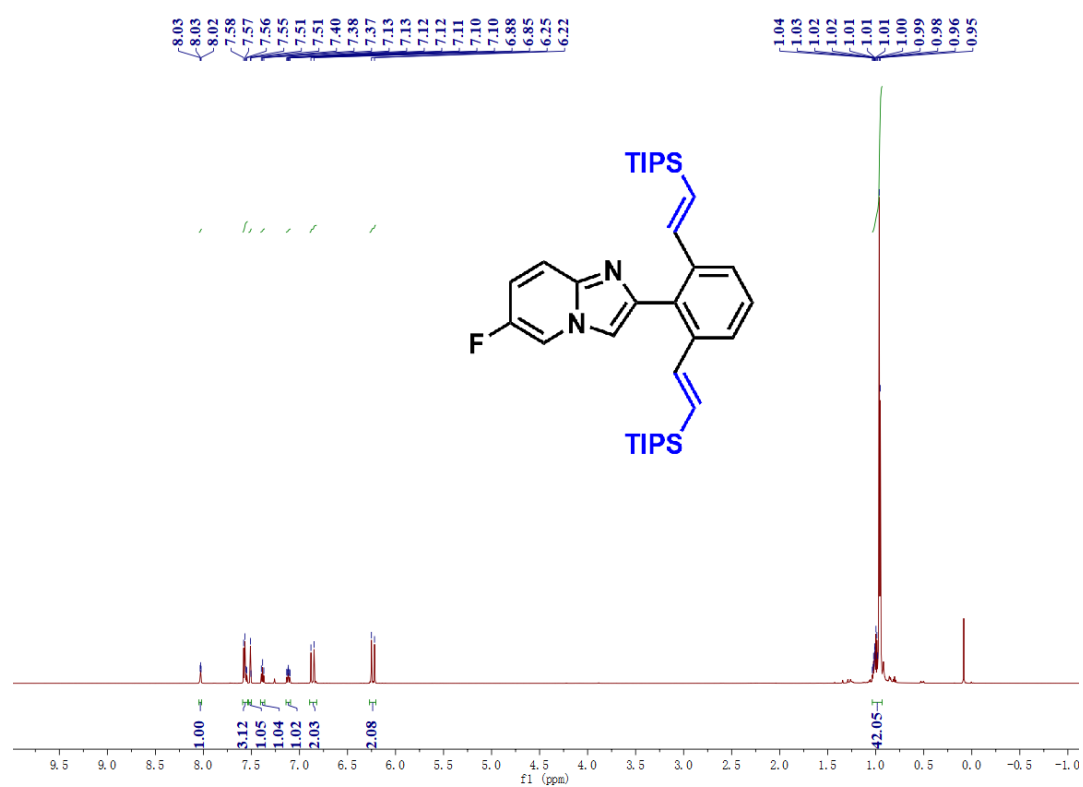

4na |  $^{13}\text{C}\{^1\text{H}\}$  NMR ( $\text{CDCl}_3$ , 151 MHz)

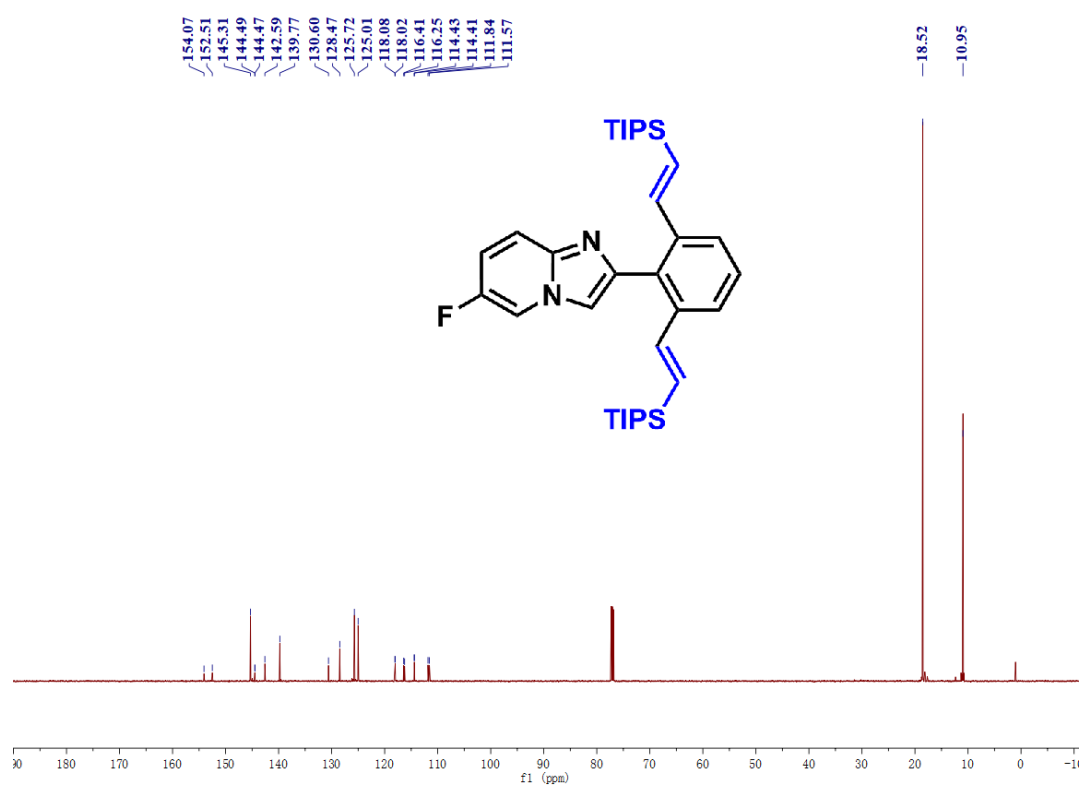

4na |  $^{19}\text{F}\{^1\text{H}\}$  NMR ( $\text{CDCl}_3$ , 565 MHz)

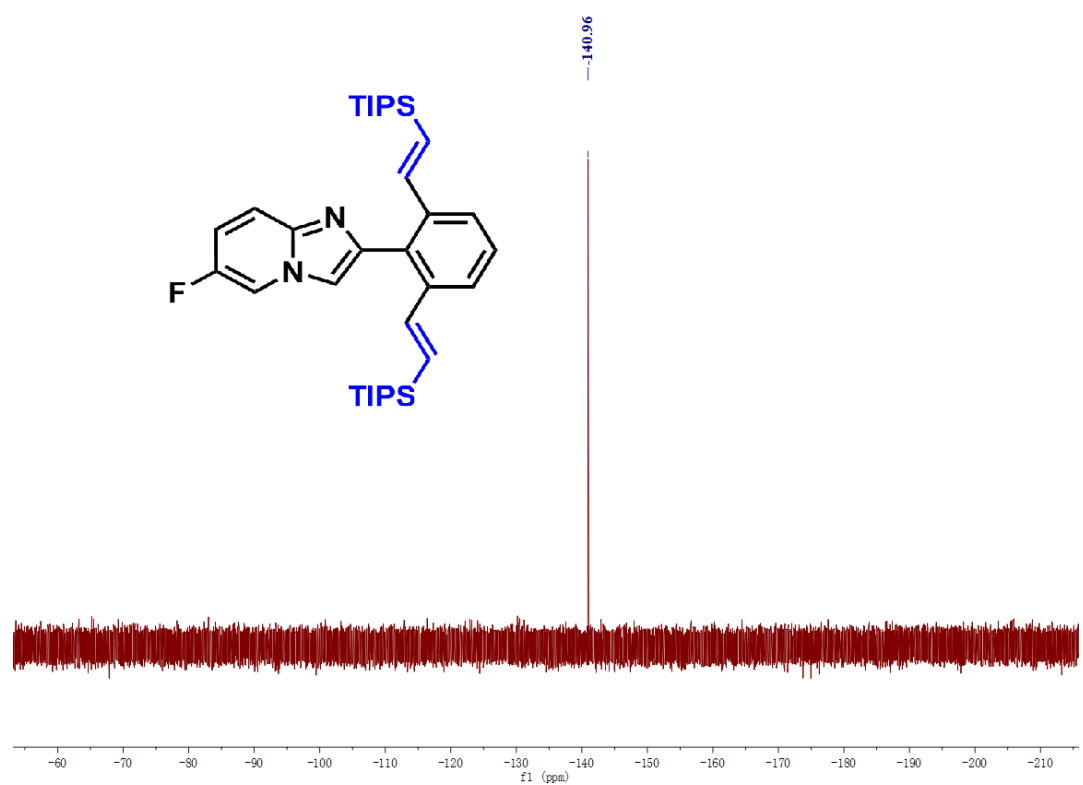

4oa | <sup>1</sup>H NMR (CDCl<sub>3</sub>, 600 MHz)

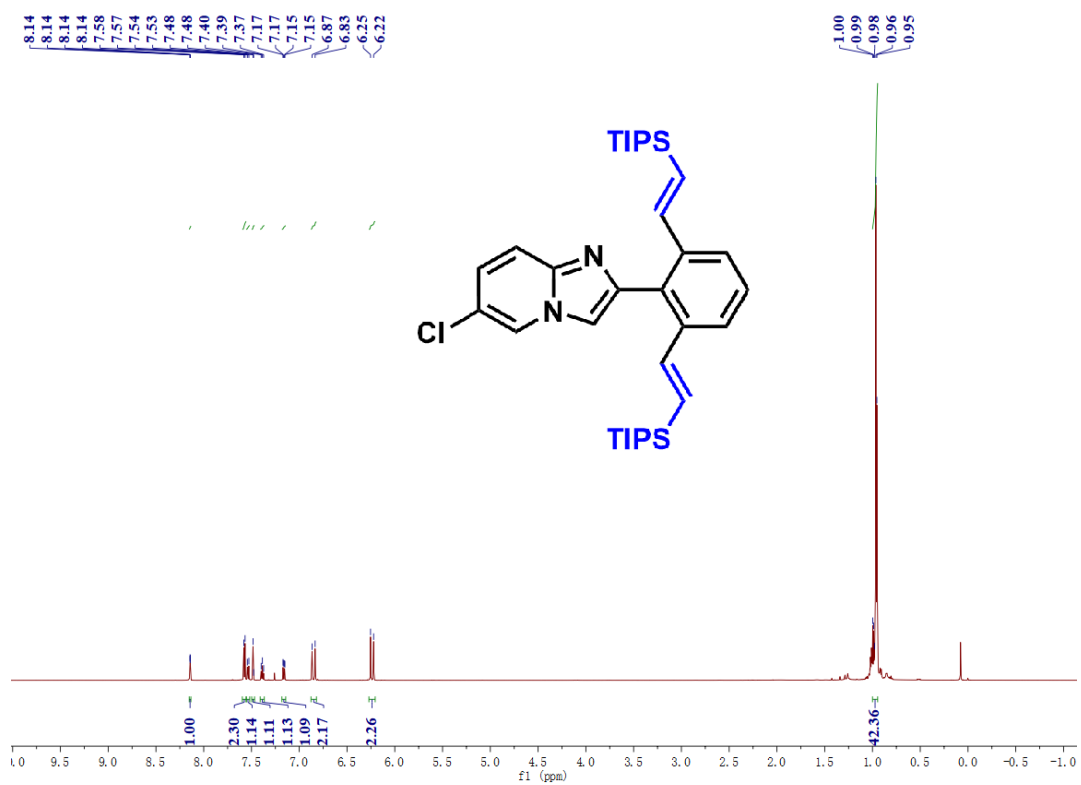

4oa | <sup>13</sup>C{<sup>1</sup>H} NMR (CDCl<sub>3</sub>, 151 MHz)

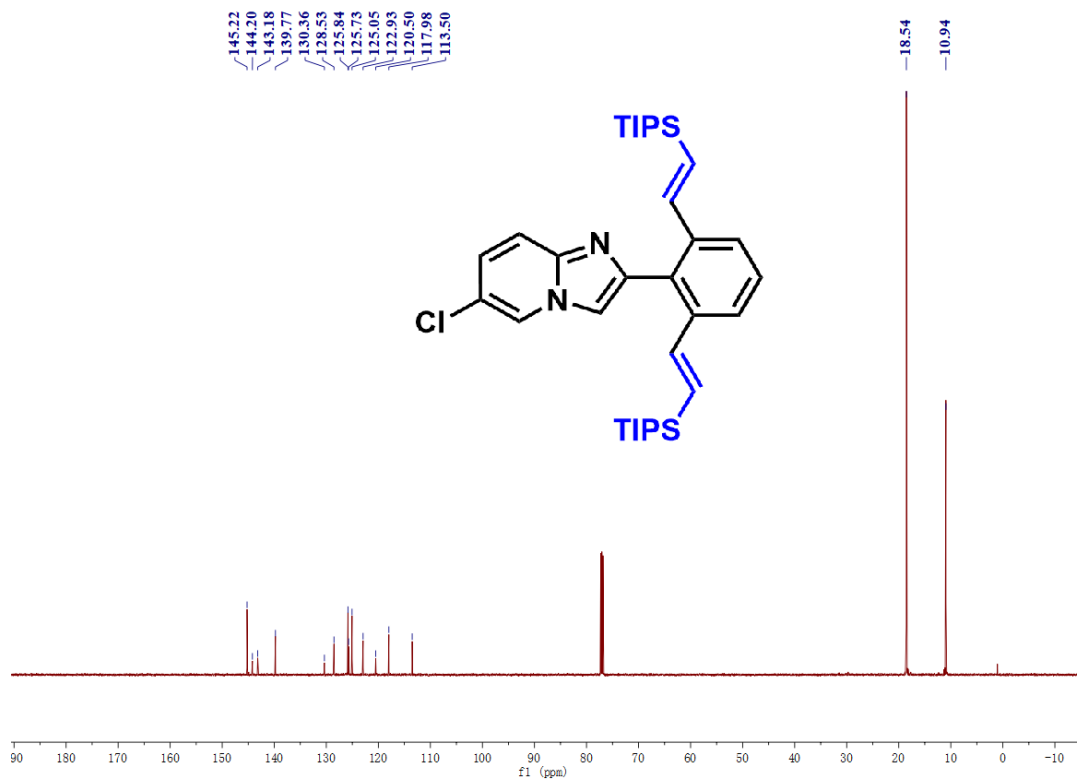

4qa | <sup>1</sup>H NMR (CDCl<sub>3</sub>, 600 MHz)

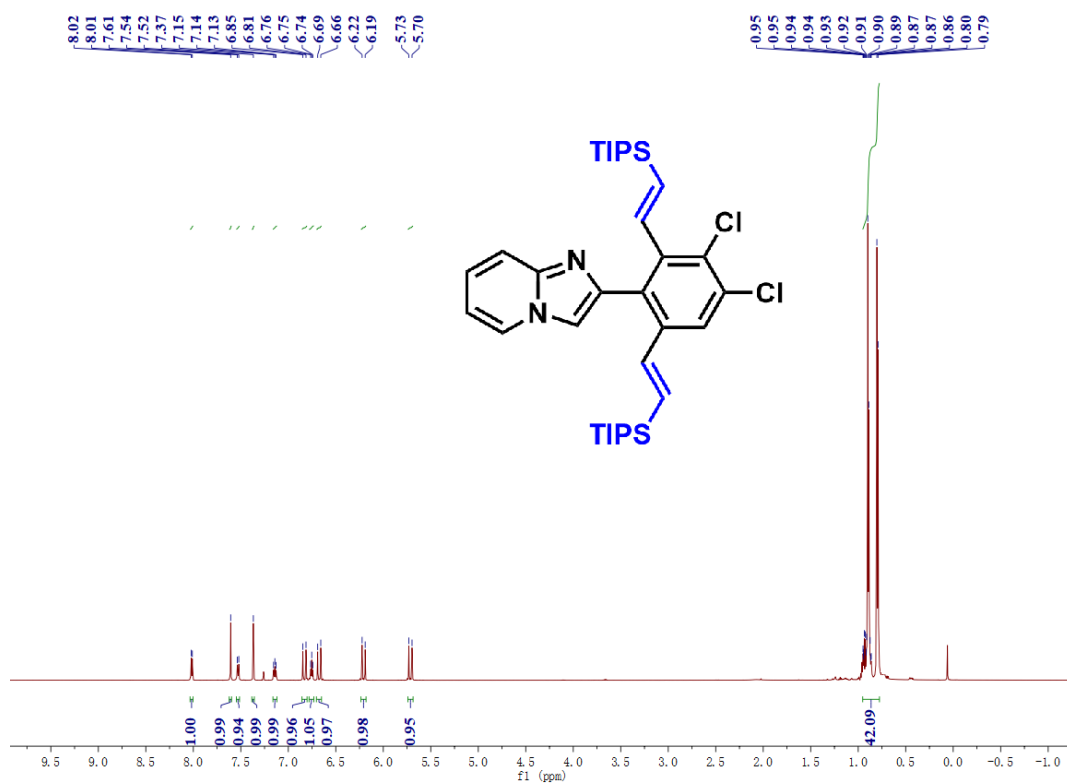

4qa | <sup>13</sup>C{<sup>1</sup>H} NMR (CDCl<sub>3</sub>, 151 MHz)

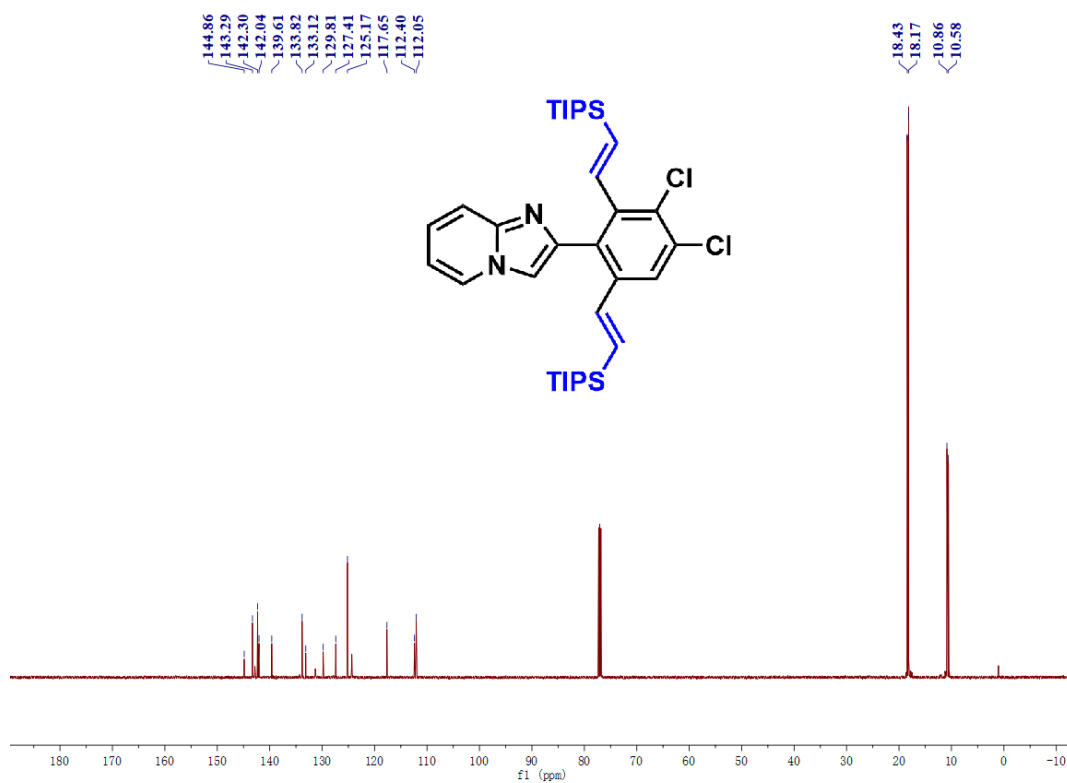

4ra | <sup>1</sup>H NMR (CDCl<sub>3</sub>, 600 MHz)

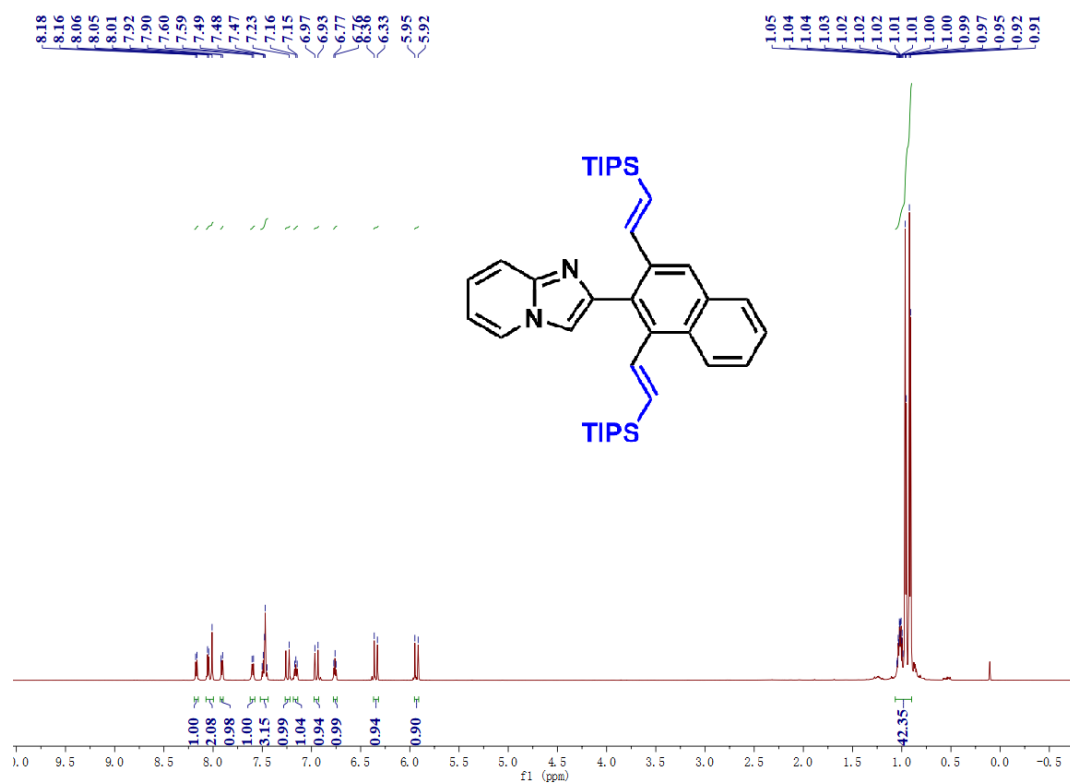

4ra | <sup>13</sup>C{<sup>1</sup>H} NMR (CDCl<sub>3</sub>, 151 MHz)

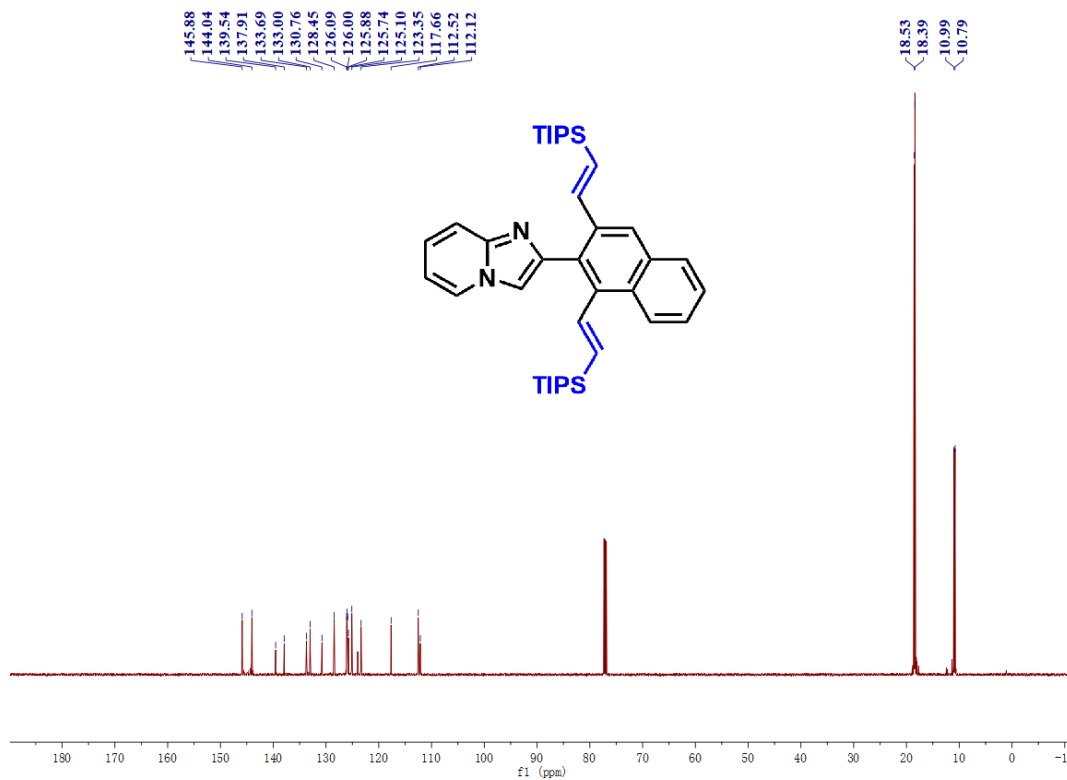

4ra<sub>1</sub> | <sup>1</sup>H NMR (CDCl<sub>3</sub>, 600 MHz)

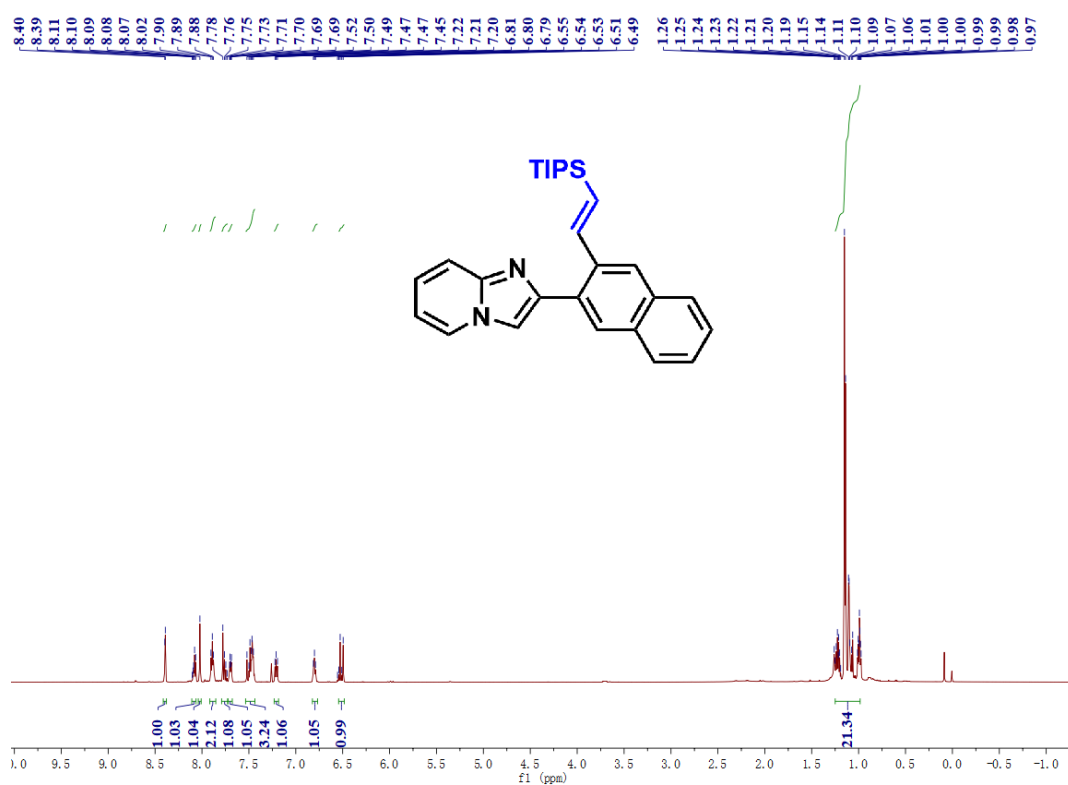

4ra<sub>1</sub> | <sup>13</sup>C{<sup>1</sup>H} NMR (CDCl<sub>3</sub>, 151 MHz)

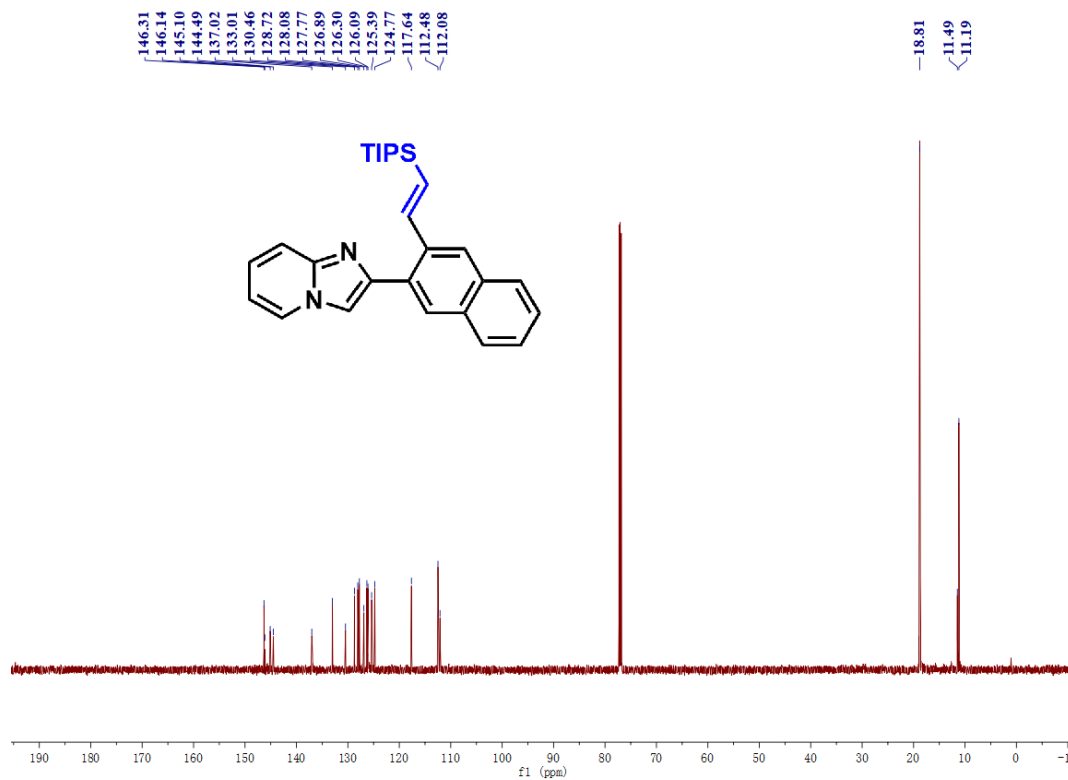

4qa<sub>1</sub> | <sup>1</sup>H NMR (CDCl<sub>3</sub>, 600 MHz)

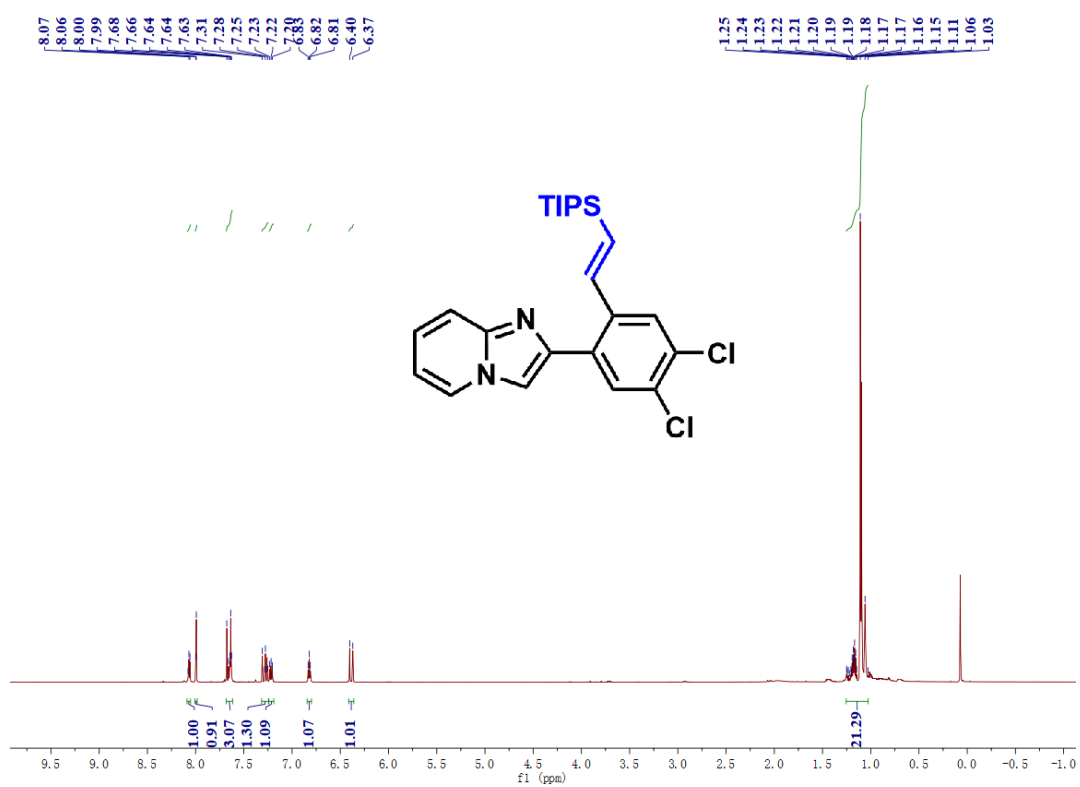

4qa<sub>1</sub> | <sup>13</sup>C{<sup>1</sup>H} NMR (CDCl<sub>3</sub>, 151 MHz)

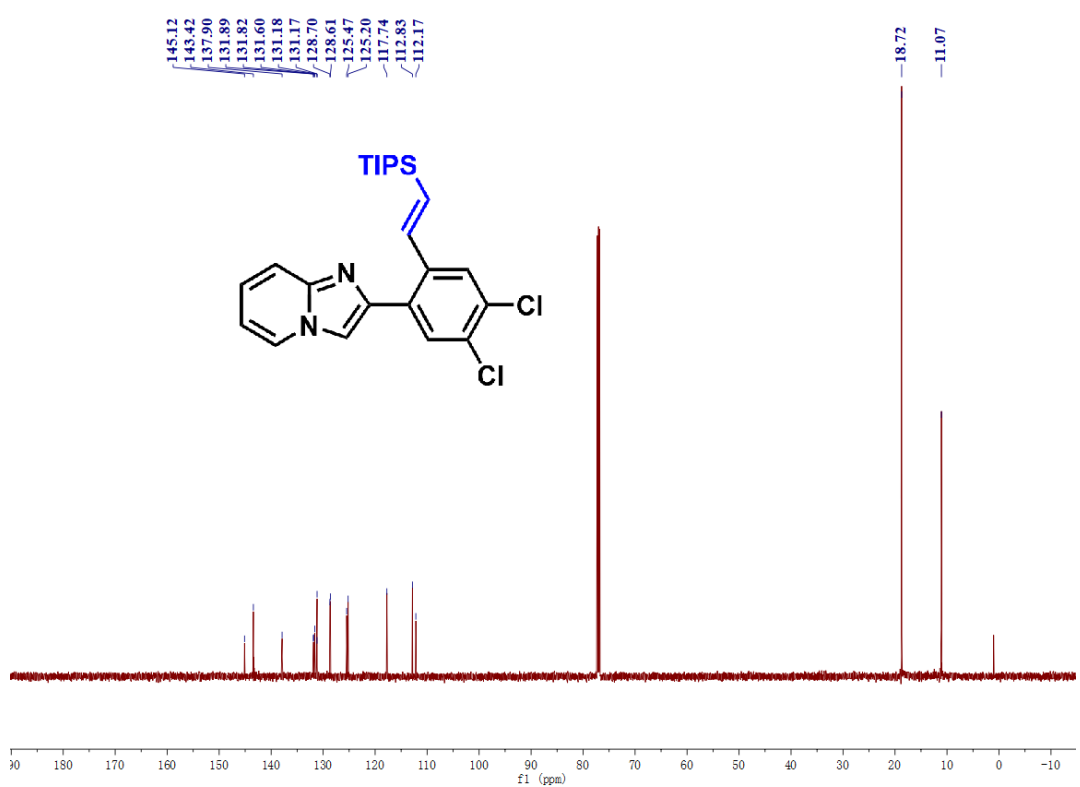

**4sa** |  $^1\text{H}$  NMR ( $\text{CDCl}_3$ , 600 MHz)

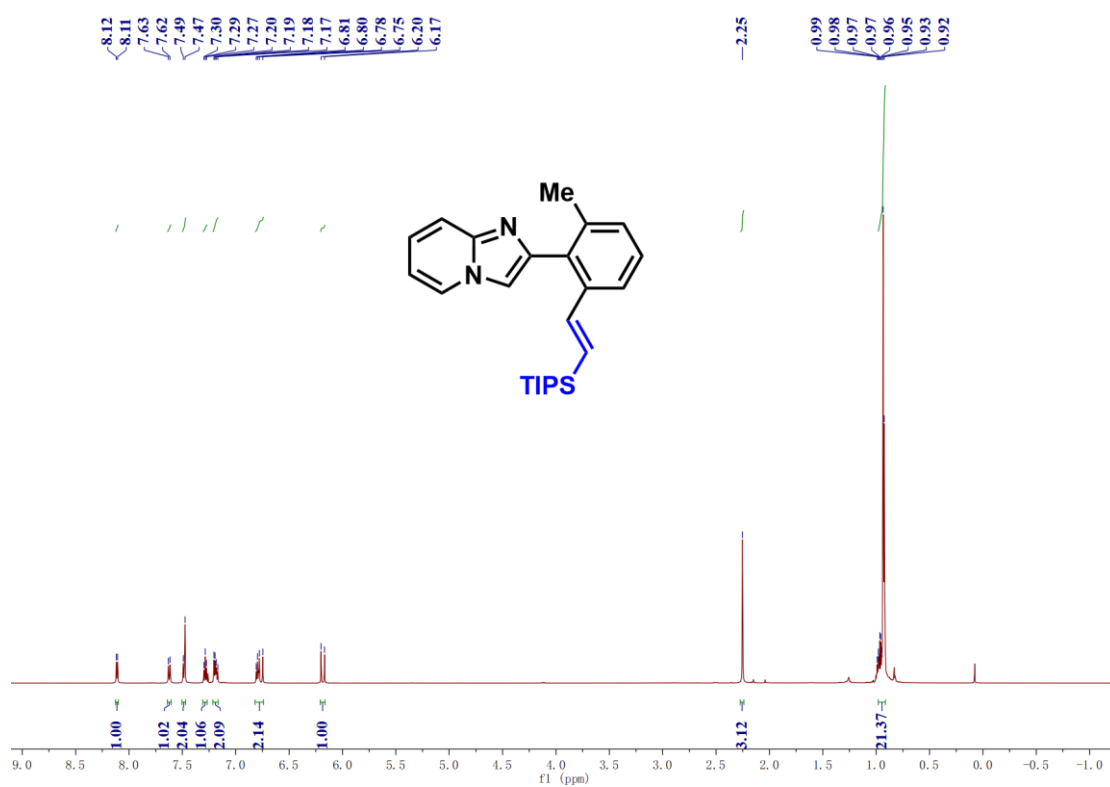

**4sa** |  $^{13}\text{C}\{^1\text{H}\}$  NMR ( $\text{CDCl}_3$ , 151 MHz)

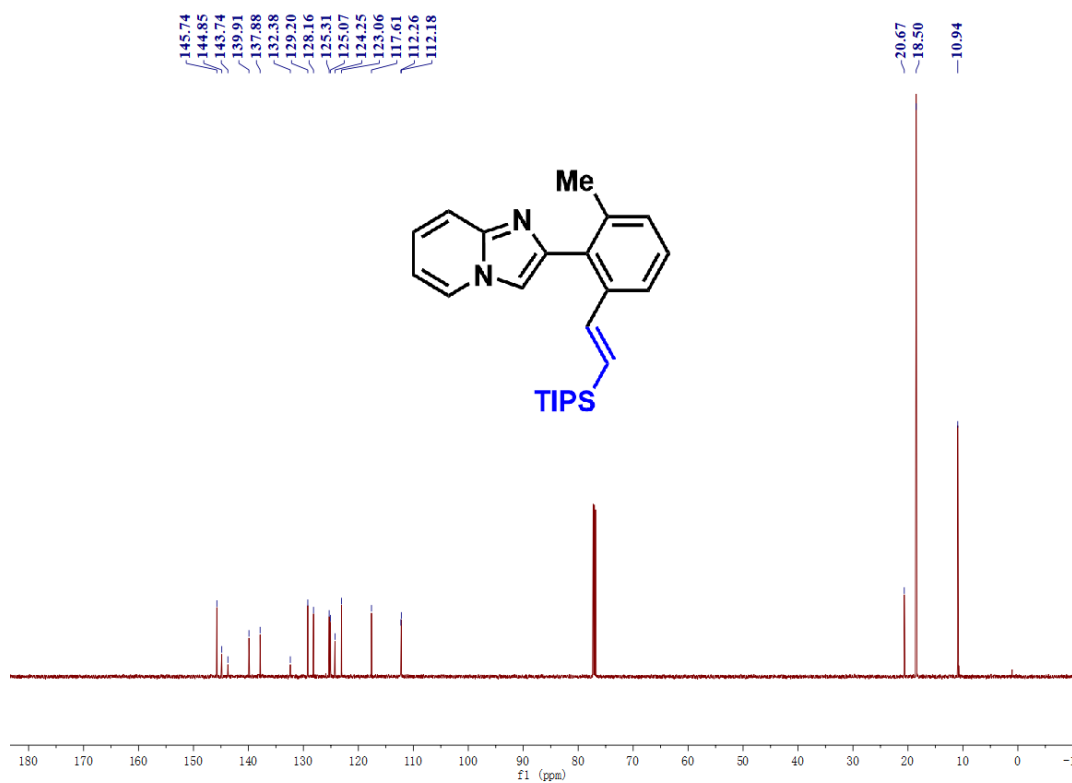

4ta |  $^1\text{H}$  NMR ( $\text{CDCl}_3$ , 600 MHz)

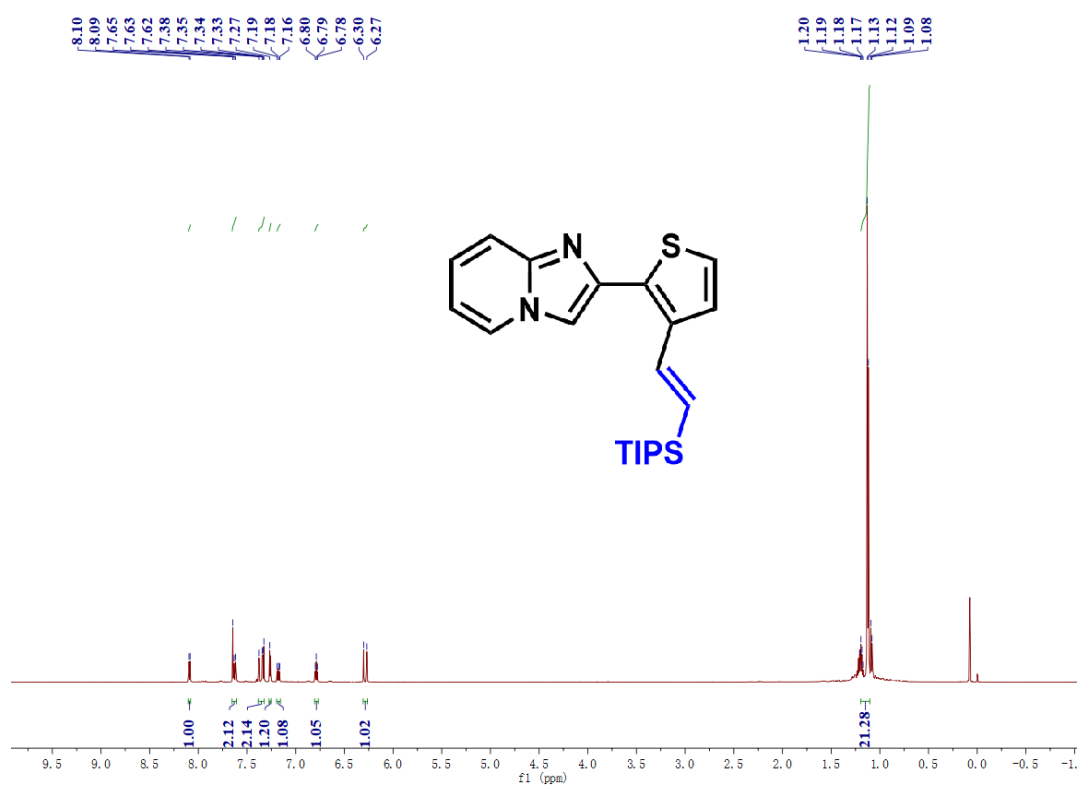

4ta |  $^{13}\text{C}\{^1\text{H}\}$  NMR ( $\text{CDCl}_3$ , 151 MHz)

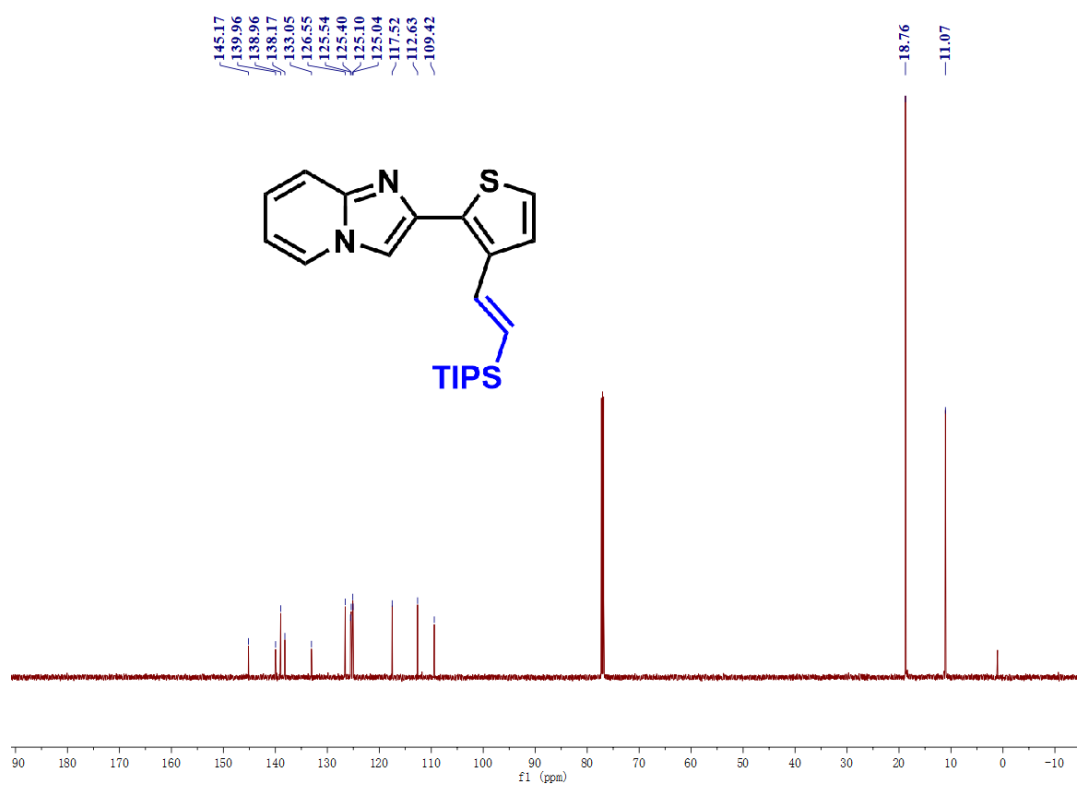

**4ab** |  $^1\text{H}$  NMR ( $\text{CDCl}_3$ , 600 MHz)

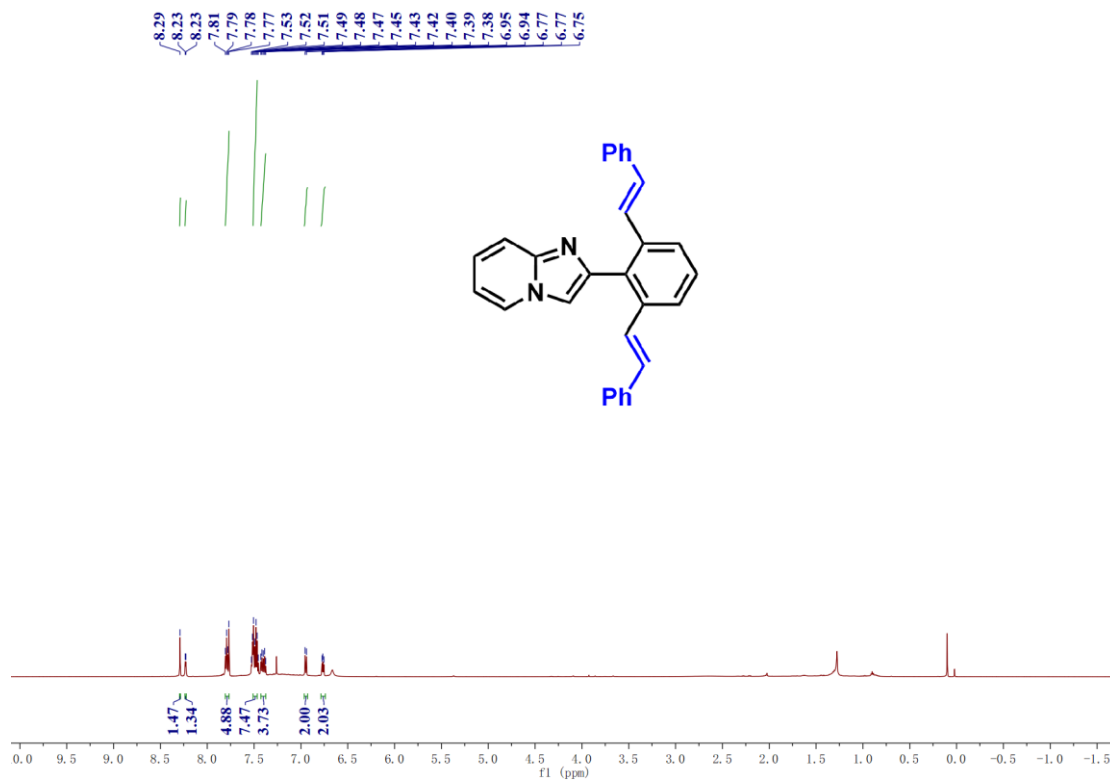

**4ab** |  $^{13}\text{C}\{^1\text{H}\}$  NMR ( $\text{CDCl}_3$ , 151 MHz)

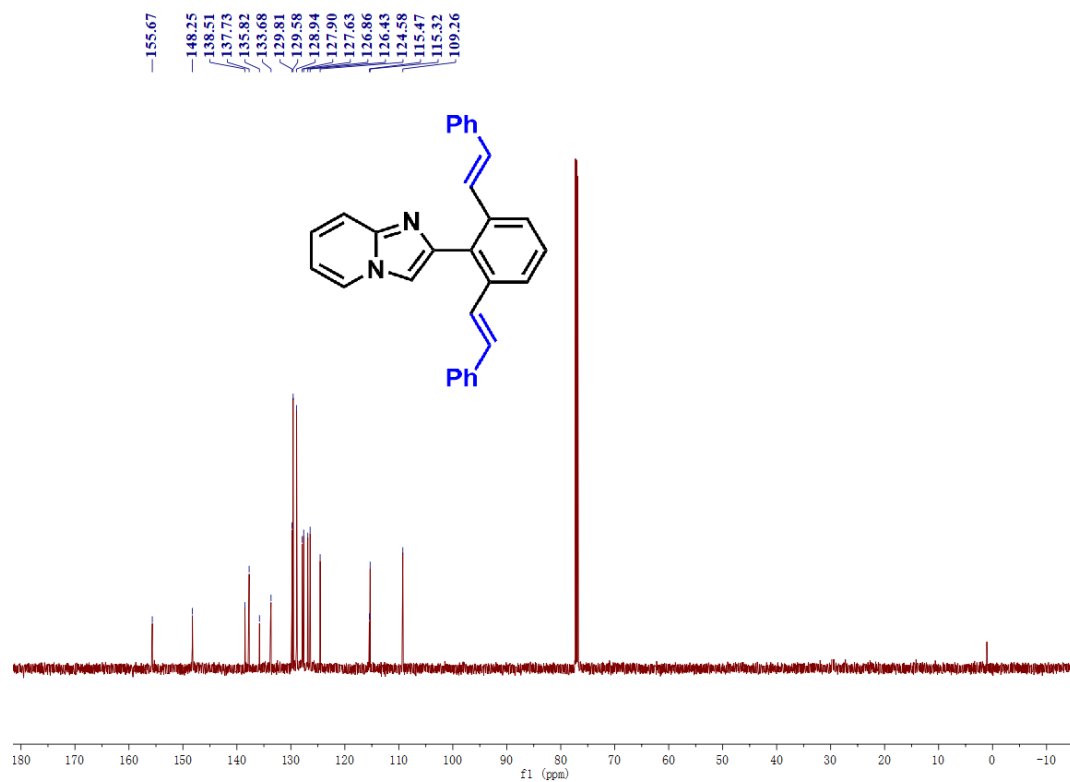

5 |  $^1\text{H}$  NMR ( $\text{CDCl}_3$ , 600 MHz)

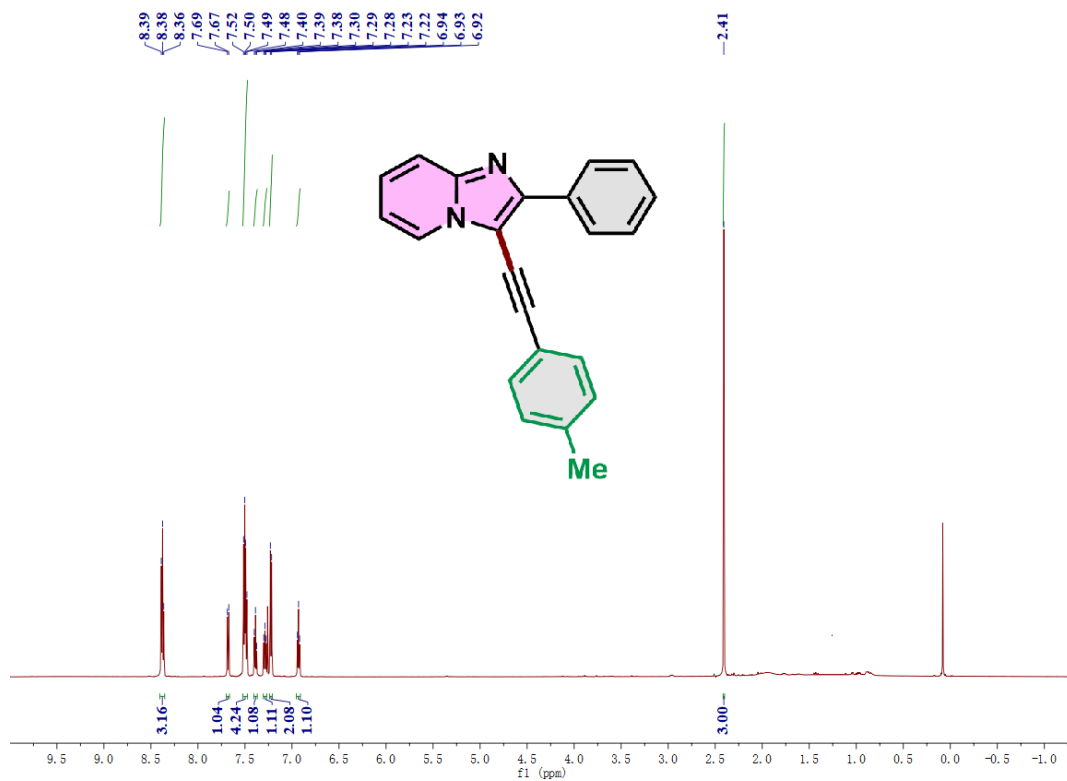

5 |  $^{13}\text{C}\{^1\text{H}\}$  NMR ( $\text{CDCl}_3$ , 151 MHz)

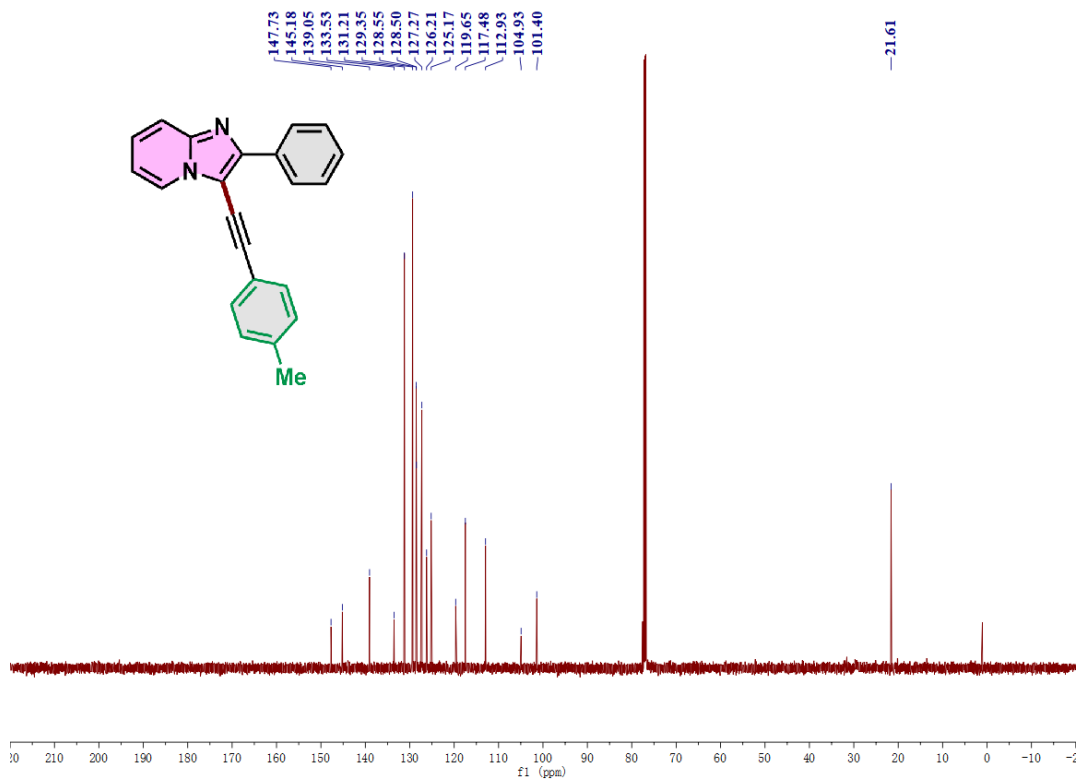

6 |  $^1\text{H}$  NMR ( $\text{CDCl}_3$ , 600 MHz)

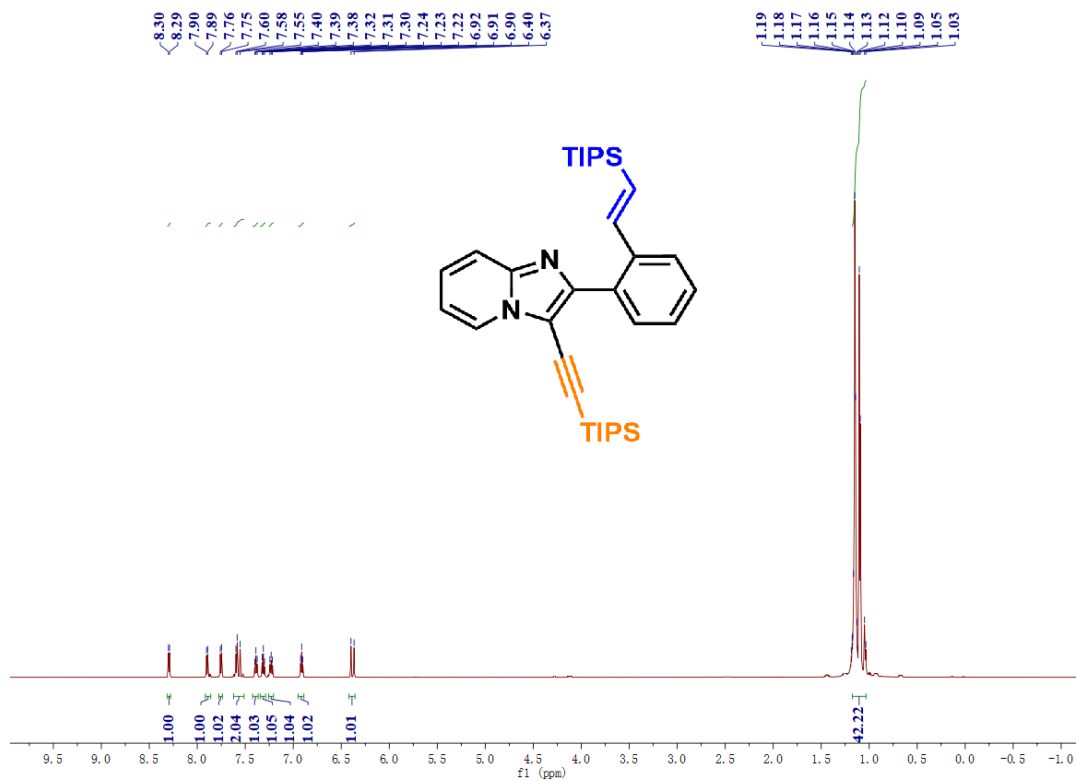

6 |  $^{13}\text{C}\{^1\text{H}\}$  NMR ( $\text{CDCl}_3$ , 151 MHz)

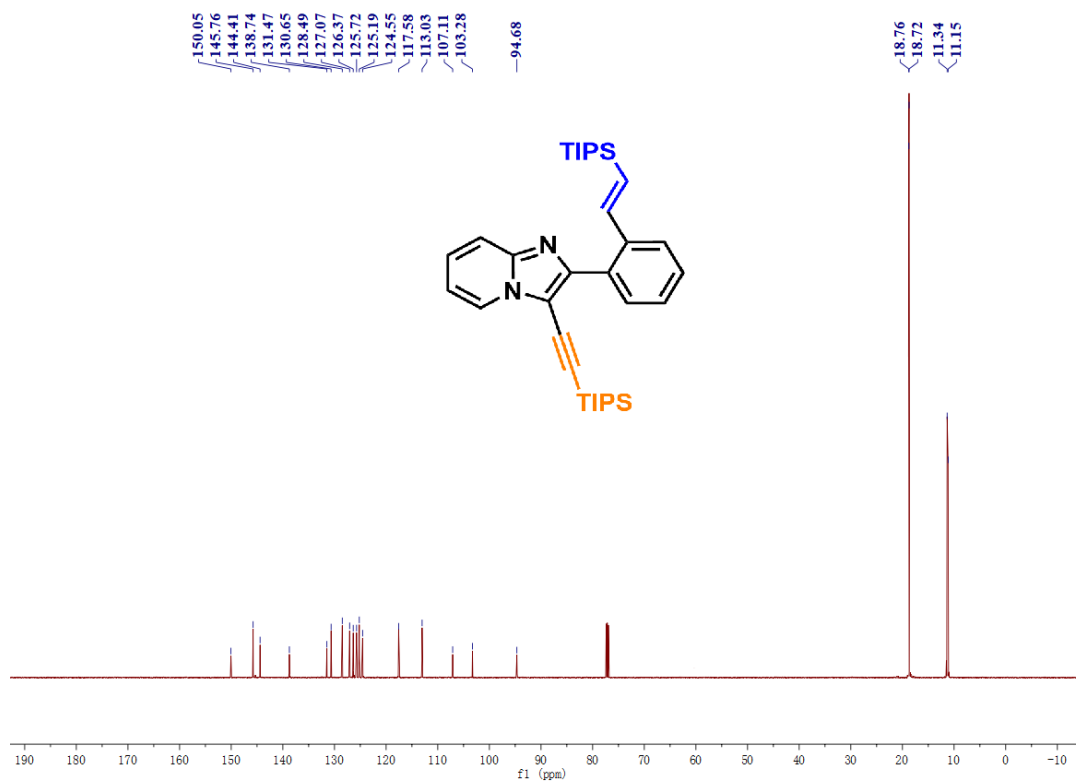

7 |  $^1\text{H}$  NMR ( $\text{CDCl}_3$ , 600 MHz)

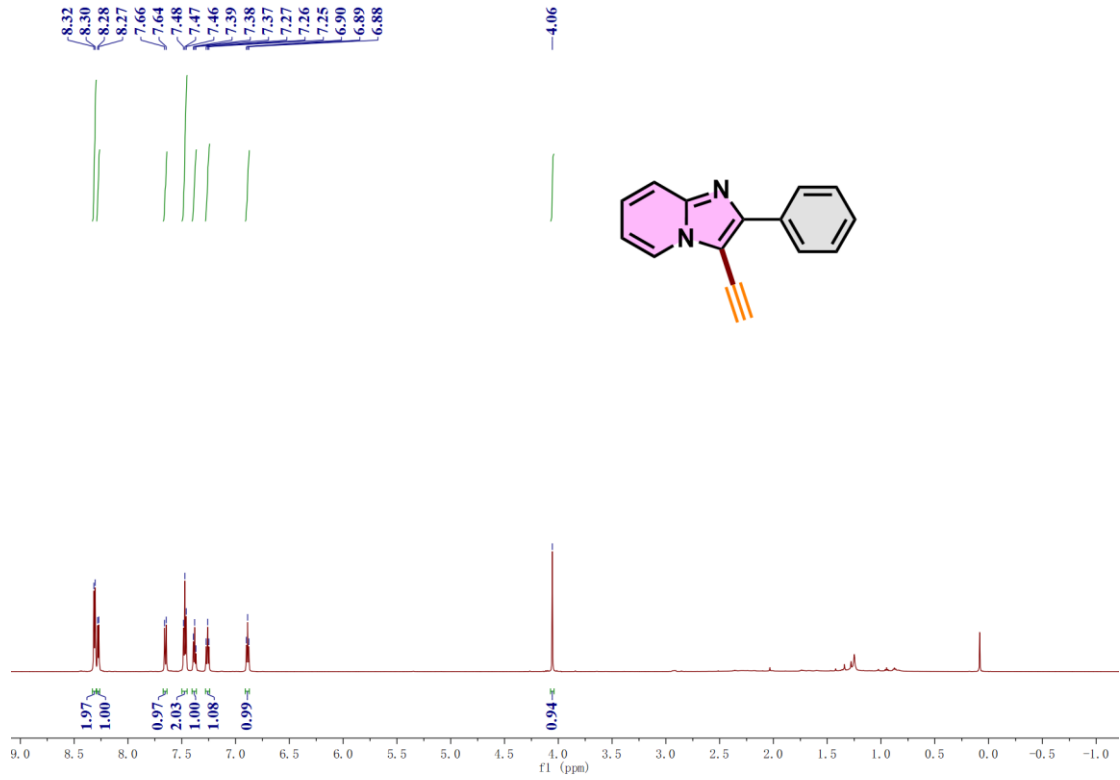

7 |  $^{13}\text{C}\{^1\text{H}\}$  NMR ( $\text{CDCl}_3$ , 151 MHz)

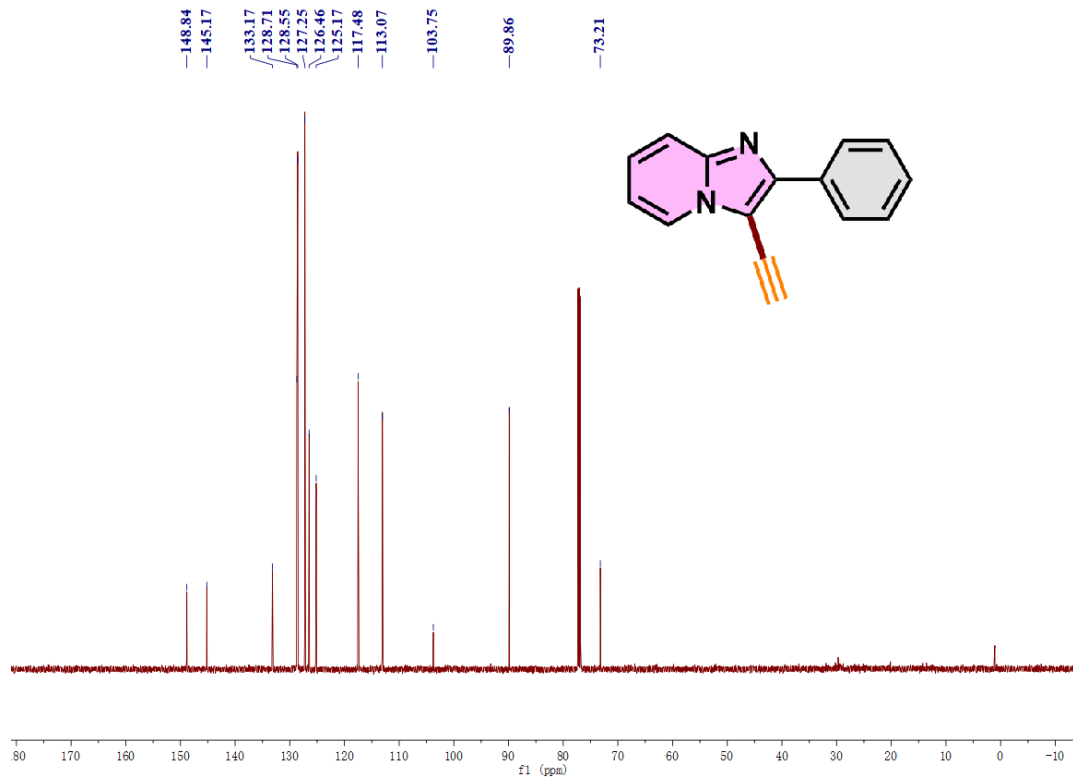

8 |  $^1\text{H}$  NMR ( $\text{CDCl}_3$ , 600 MHz)

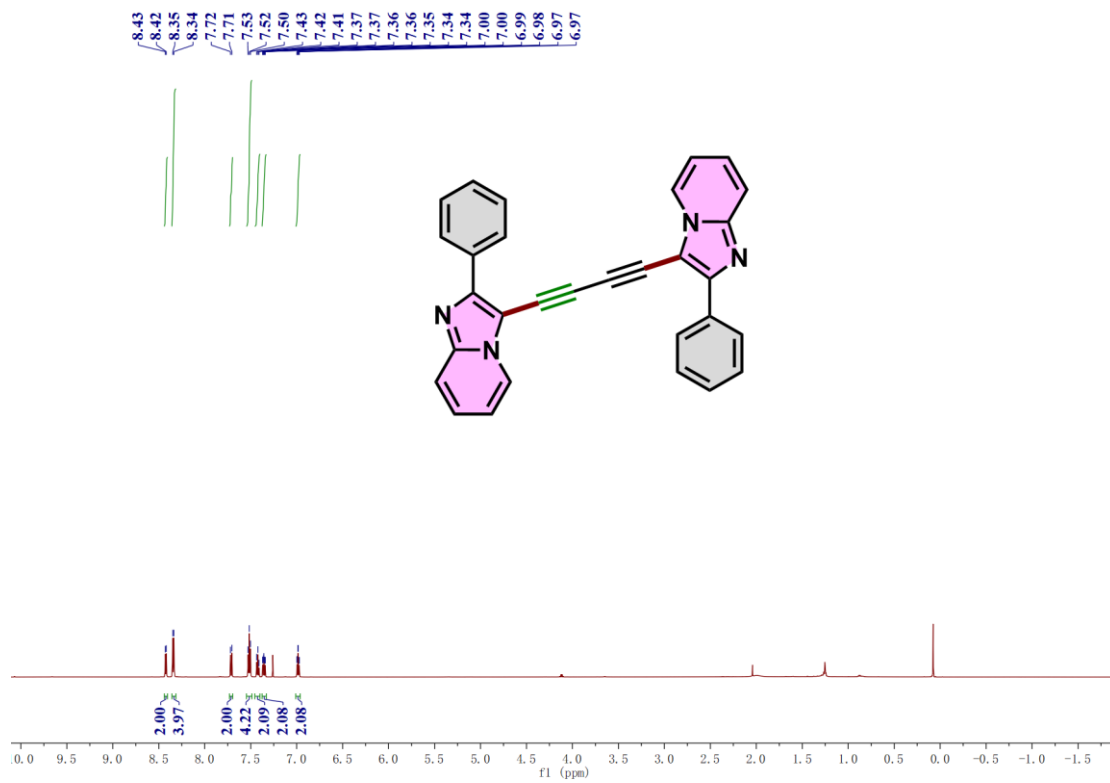

8 |  $^{13}\text{C}\{^1\text{H}\}$  NMR ( $\text{CDCl}_3$ , 151 MHz)

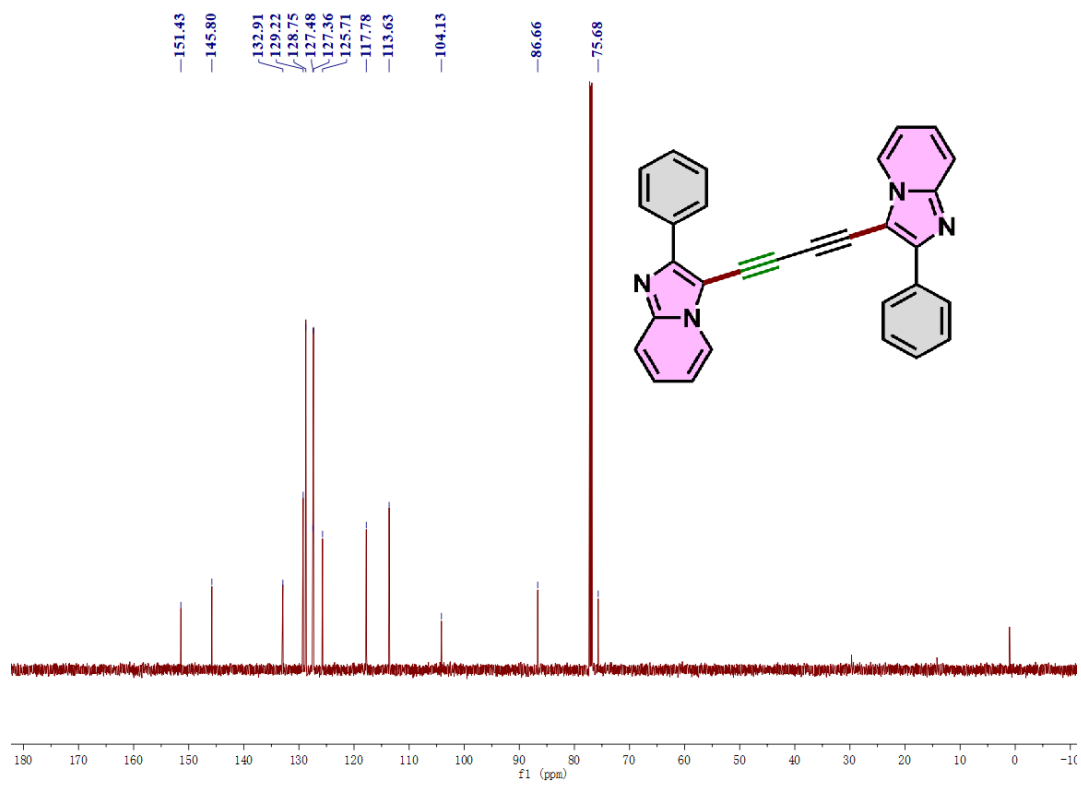

9 |  $^1\text{H}$  NMR ( $\text{CDCl}_3$ , 600 MHz)

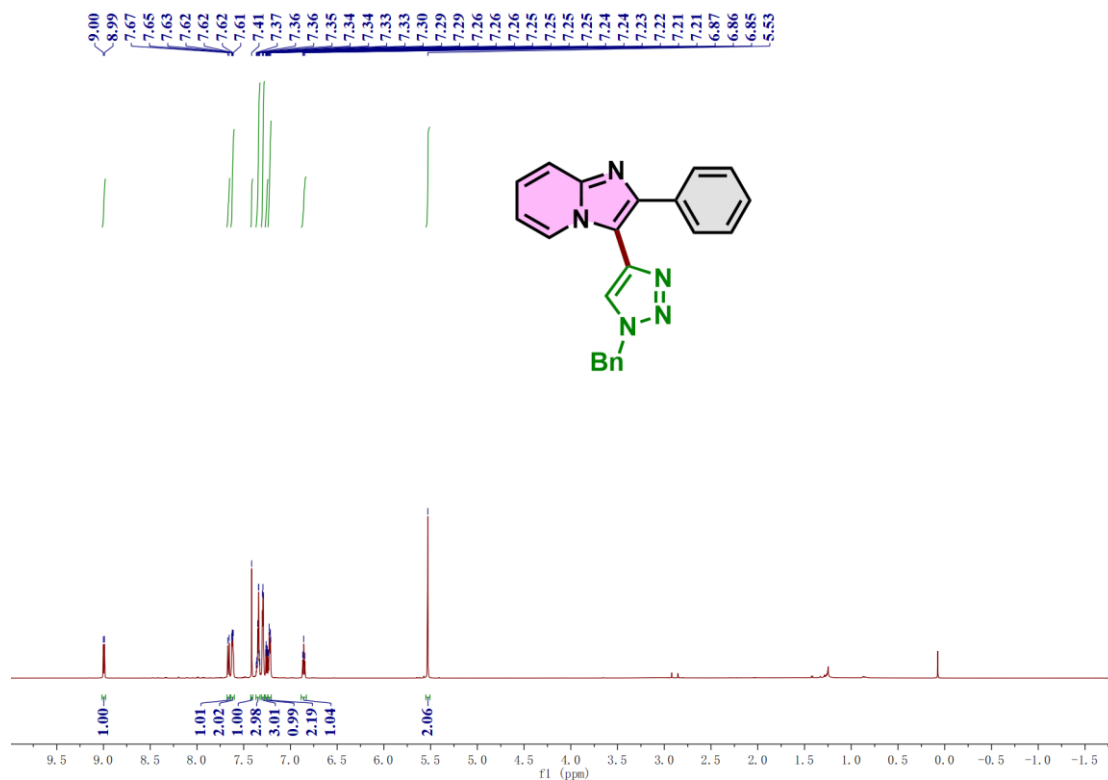

9 |  $^{13}\text{C}\{^1\text{H}\}$  NMR ( $\text{CDCl}_3$ , 151 MHz)

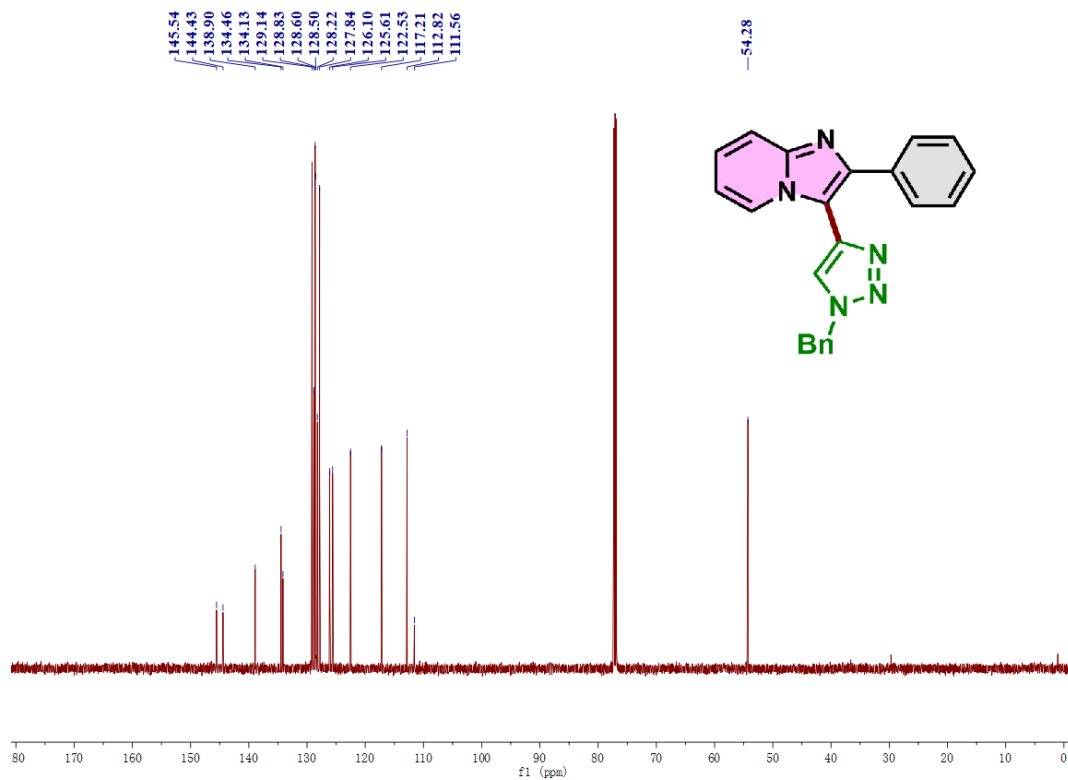

10 |  $^1\text{H}$  NMR ( $\text{CDCl}_3$ , 600 MHz)

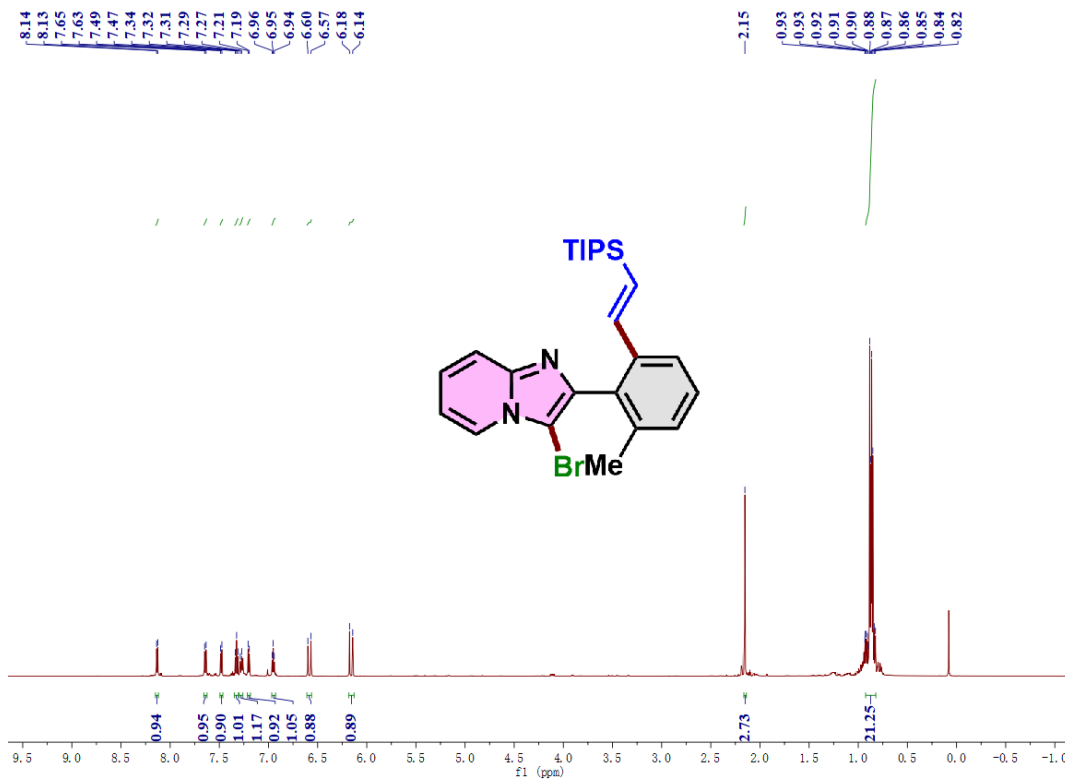

10 |  $^{13}\text{C}\{^1\text{H}\}$  NMR ( $\text{CDCl}_3$ , 151 MHz)

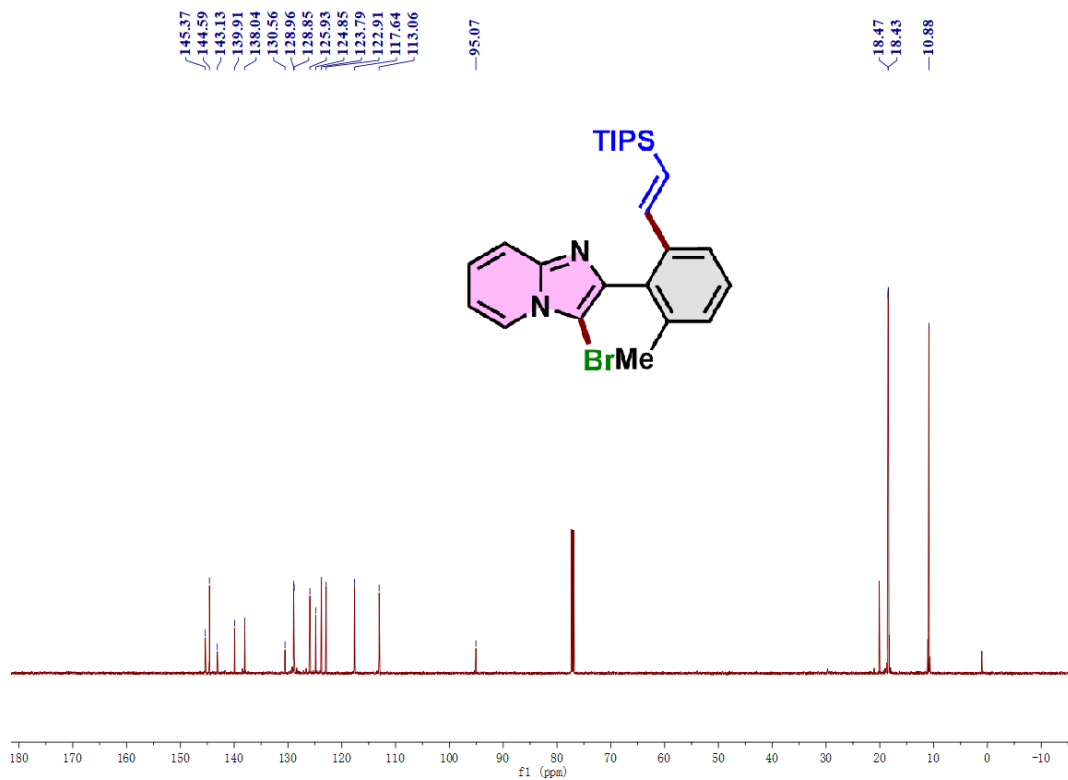

11 |  $^1\text{H}$  NMR ( $\text{CDCl}_3$ , 600 MHz)

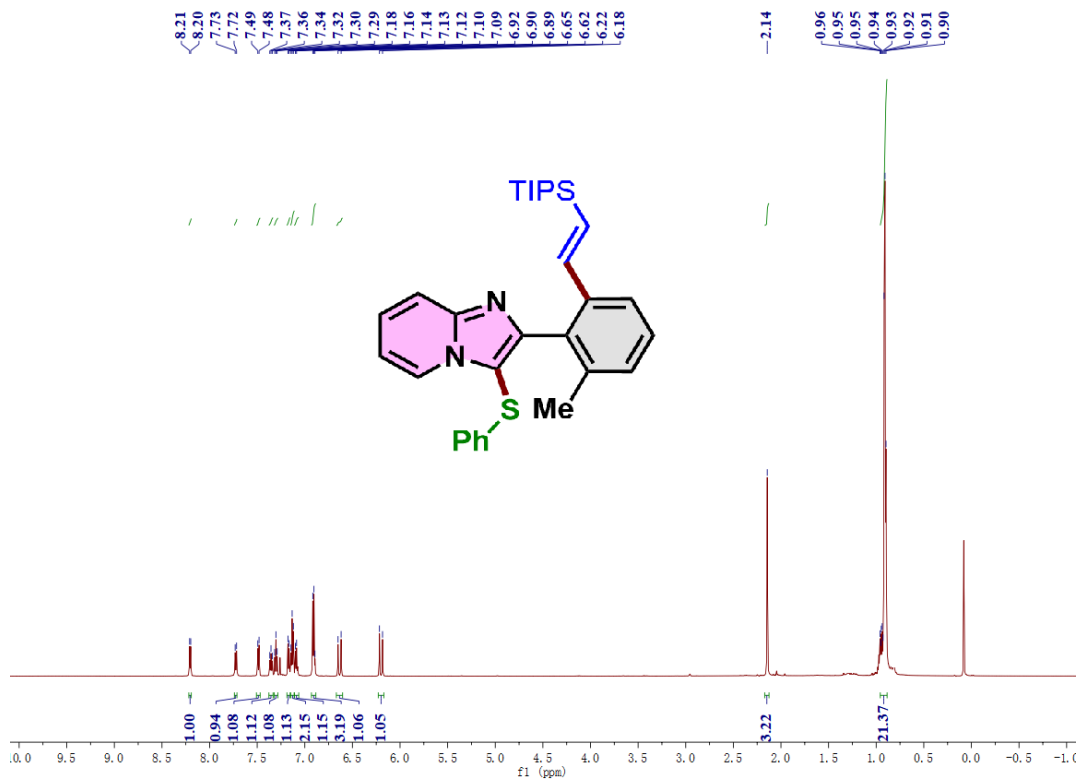

11 |  $^{13}\text{C}\{^1\text{H}\}$  NMR ( $\text{CDCl}_3$ , 151 MHz)

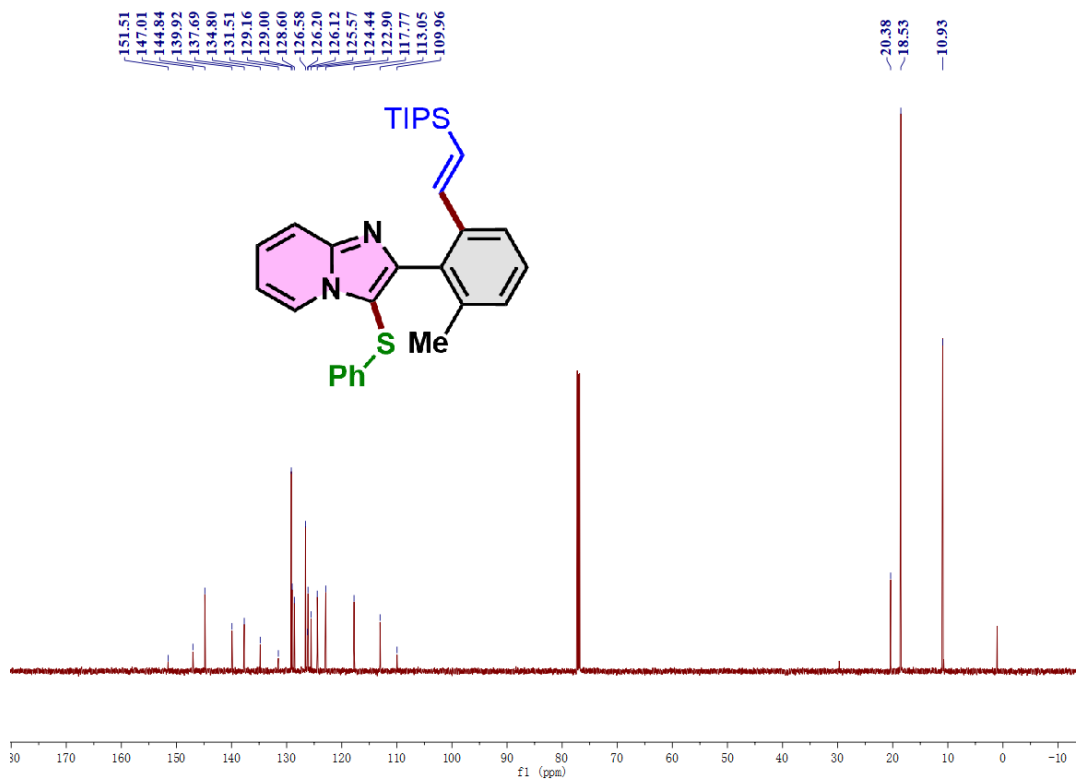



## 6. References

1. Su, H.; Wang, L.; Rao, H.; Xu, H. Iron-Catalyzed Dehydrogenative  $sp^3$ – $sp^2$  Coupling via Direct Oxidative C–H Activation of Acetonitrile. *Org. Lett.* **2017**, *19*, 2226–2229.
2. Ge, W. L.; Zhu, X.; Wei, Y. Y. Aerobic Multicomponent Tandem Synthesis of 3-Sulfonylimidazo[1,2-*a*] pyridines from Ketones, 2-Aminopyridines, and Disulfides. *Eur. J. Org. Chem.* **2013**, *27*, 6015–6020.
3. Liu, Y. P.; Lu, L. X.; Zhou, H. P.; Xu, F. J.; Ma, C.; Huang, Z. J.; Xu, J. Y.; Xu, S. T. Chemodivergent synthesis of *N*-(pyridin-2-yl)amides and 3-bromoimidazo[1,2-*a*]pyridines from  $\alpha$ -bromoketones and 2-aminopyridines. *RSC Adv.* **2019**, *9*, 34671–34676.
